# Supplementary material for: Novel 5-anilinoquinazoline-8-nitro derivatives as inhibitors of VEGFR-2 tyrosine kinase: synthesis, biological evaluation and molecular docking
Source: Royal Society of Chemistry journal article supplement (doi:10.1039/c3ob40368h), 2013-01-01

Supporting Information

For

# A Novel 5-anilinoquinazoline-8-nitro derivatives as inhibitors of VEGFR-2 tyrosine kinase: synthesis, biological evaluation and molecular docking

Liang Xi,<sup>a</sup> Jian-Xiang Zhang,<sup>a</sup> Zhi-Cheng Liu,<sup>c</sup> Ji-Hong Zhang,<sup>c</sup> Ju-Fang Yang,<sup>d</sup> Yi Jin\*<sup>a</sup> and Jun Lin\*<sup>a,b</sup>

5

<sup>a</sup> Key Laboratory of Medicinal Chemistry for Natural Resource (Yunnan University), Ministry Education, School of Chemical Science and Technology, Yunnan University, Kunming, 650091, P. R. China.

<sup>b</sup> State Key Laboratory of Elemento-organic Chemistry, Nankai University, Tianjin, 300071, P. R. China

<sup>c</sup> Faculty of Life Science and Technology, Kunming University of Science and Technology, Kunming 650224, PR China

<sup>d</sup> Chengdu DiAo Pharmaceut Grp Co Ltd, Drug Screening Ctr, Chengdu 610041, Peoples R China

E-mail: [jinyi@ynu.edu.cn](mailto:jinyi@ynu.edu.cn); [linjun@ynu.edu.cn](mailto:linjun@ynu.edu.cn); Fax: +86 871 5033215.

15 <sup>1</sup>H NMR AND <sup>13</sup>C NMR SPECTRA OF 4a-4z COMPOUNDS .....2-22

<sup>1</sup>H NMR, <sup>13</sup>C NMR, MS AND IR SPECTRA OF 6a-6z COMPOUNDS.....23-70

20

The caculated logP and logD(PH = 7.4) of 4-hydroxy quinazolines.....71-72

The Binding mode of Compound 6f in EGFR or VEGFR-2 Kinase activity pocket area.....73-74

25

30

35

40

45

50

55

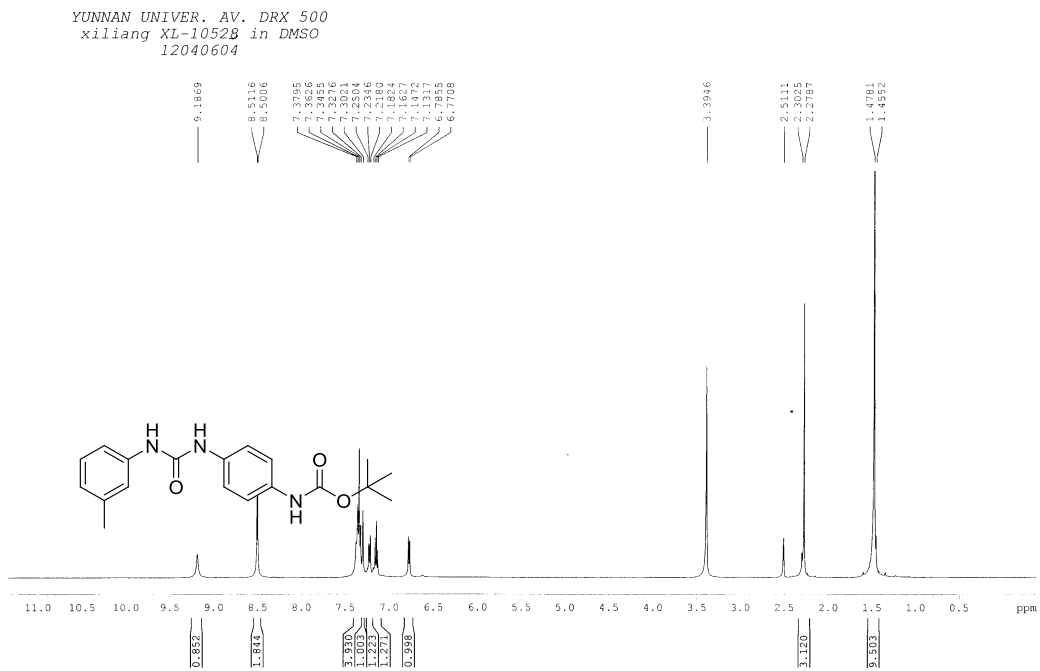

<sup>1</sup>H-NMR spectrum of 4a

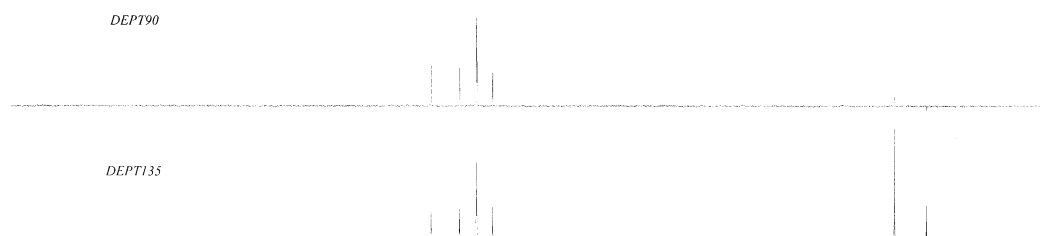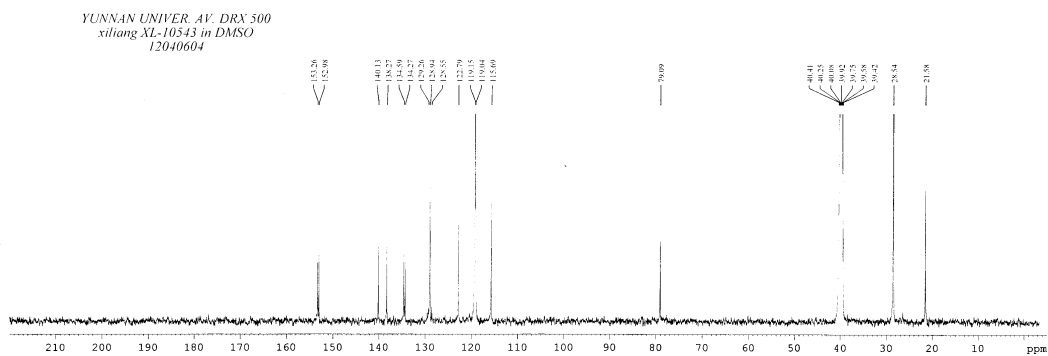

<sup>13</sup>C-NMR spectrum of 4a

Supporting Information

For

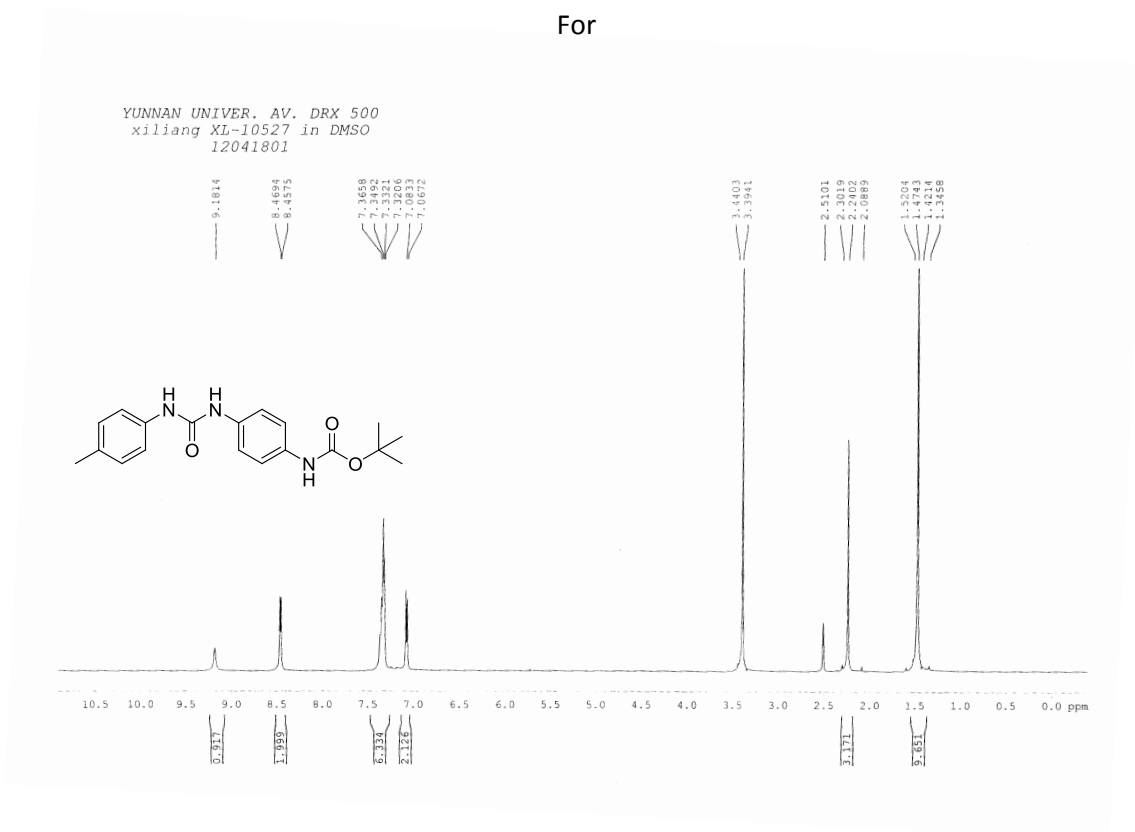

<sup>1</sup>H-NMR spectrum of 4b

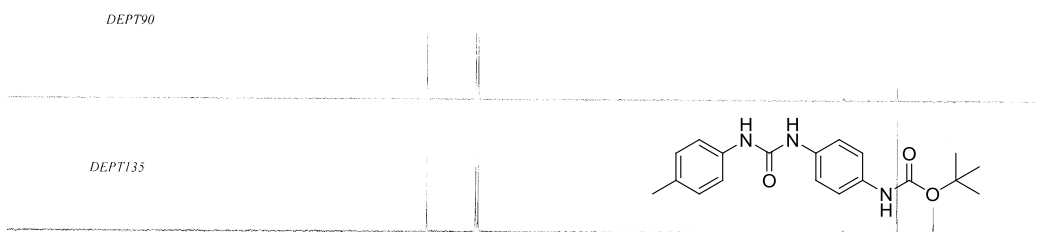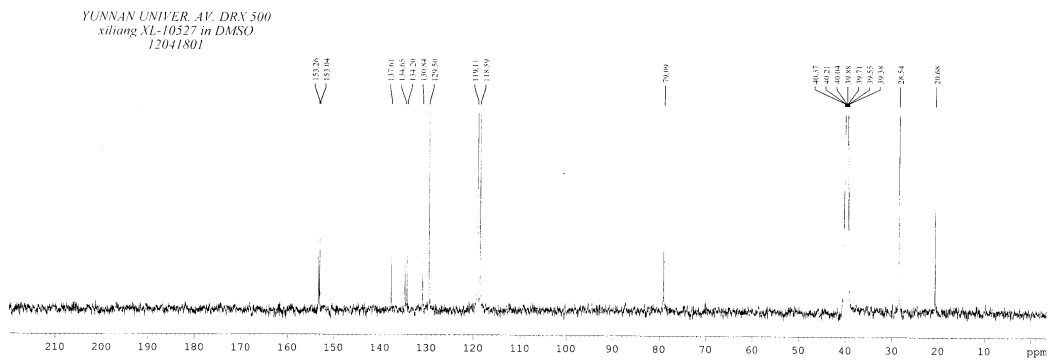

<sup>13</sup>C-NMR spectrum of 4b

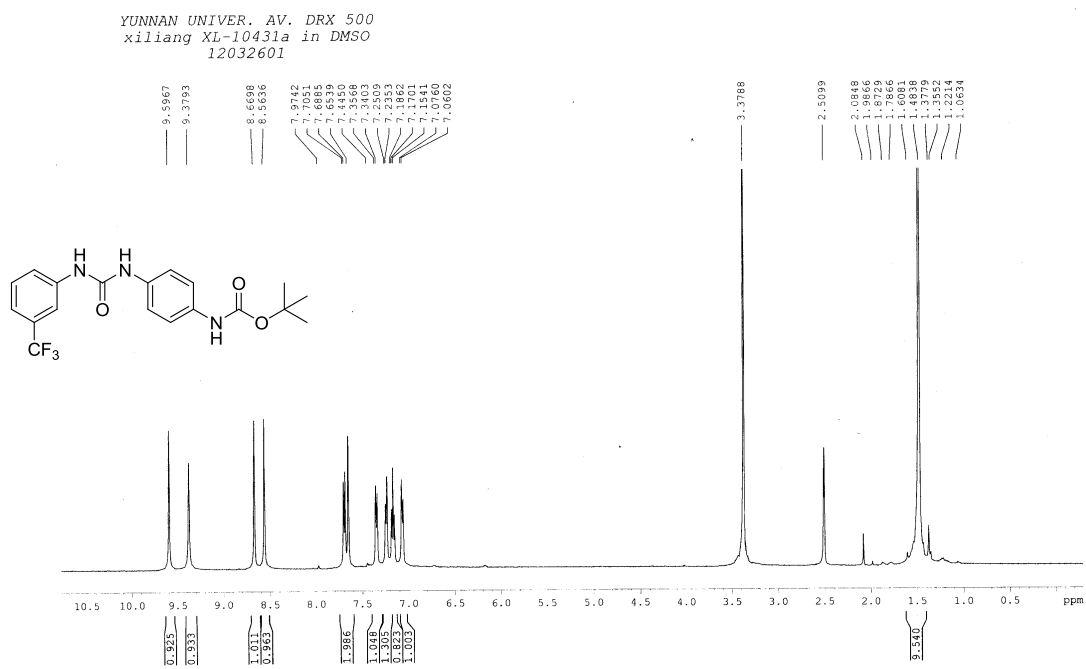

<sup>1</sup>H-NMR spectrum of 4d

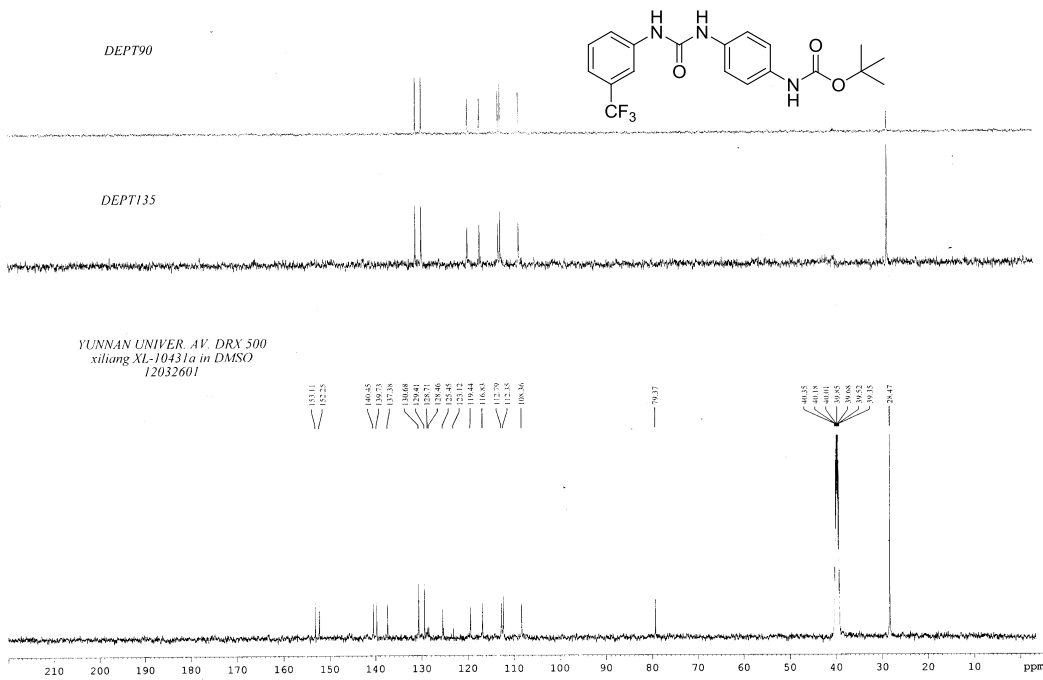

<sup>13</sup>C-NMR spectrum of 4d

### Supporting Information

For

YUNNAN UNIVER. AV. DRX 500  
xiliang XL-10548 in DMSO  
12040605

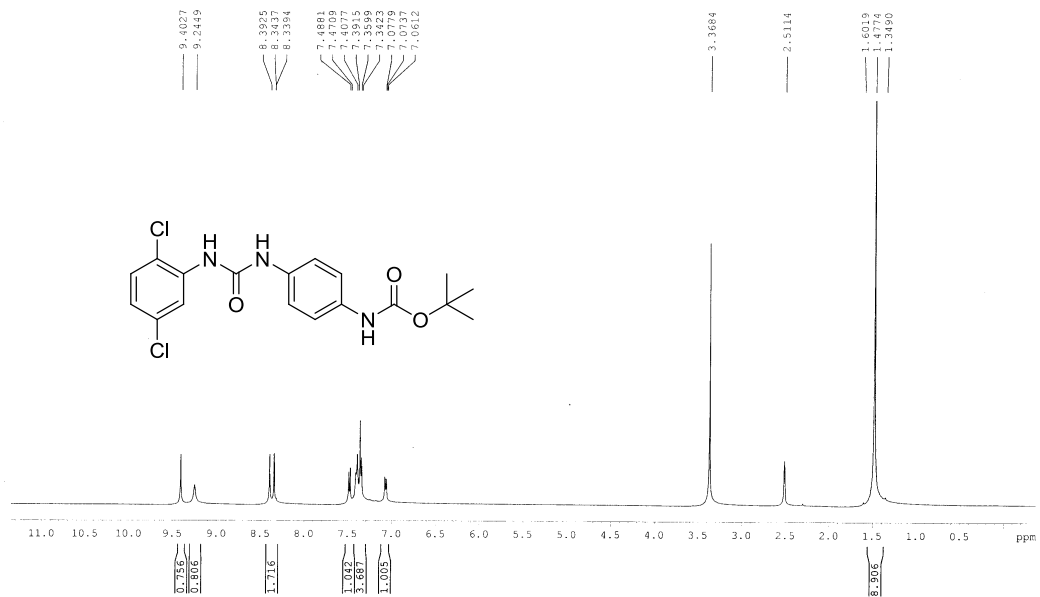

<sup>1</sup>H-NMR spectrum of 4e

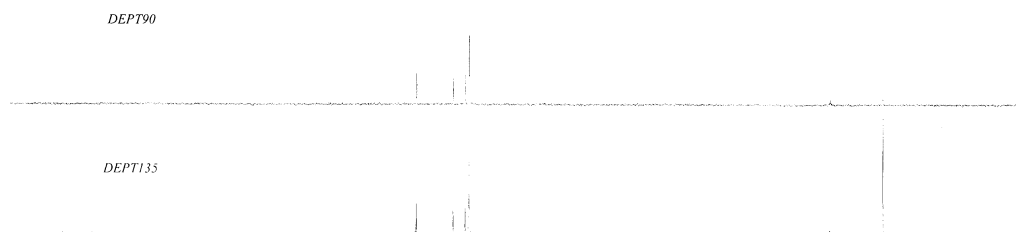

YUNNAN UNIVER. AV. DRX 500  
xiliang XL-10548 in DMSO  
12040605

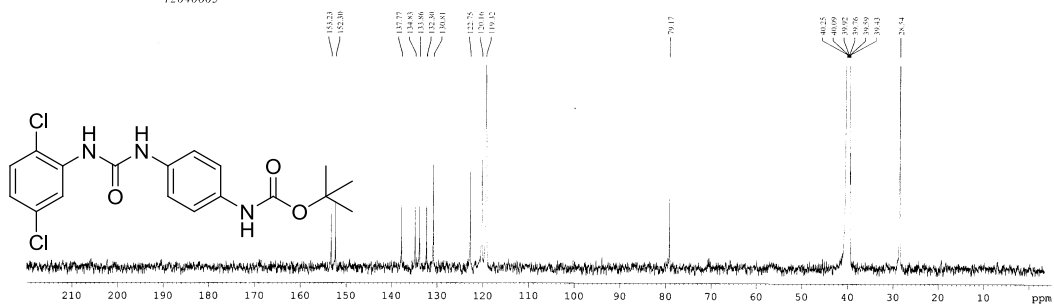

<sup>13</sup>C-NMR spectrum of 4e

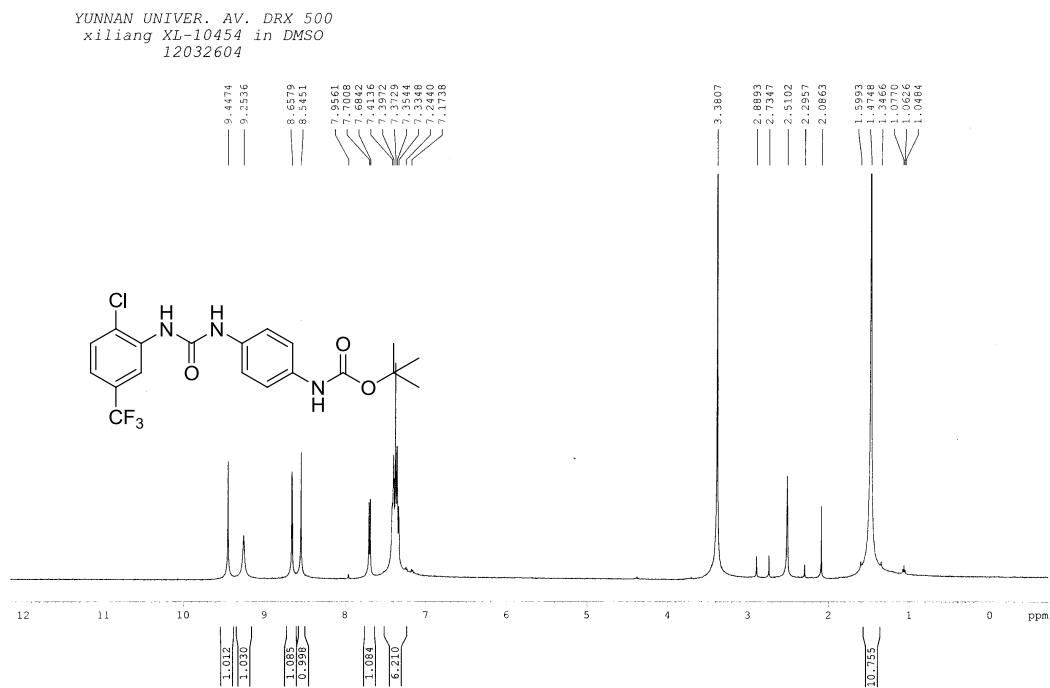

<sup>1</sup>H-NMR spectrum of 4f

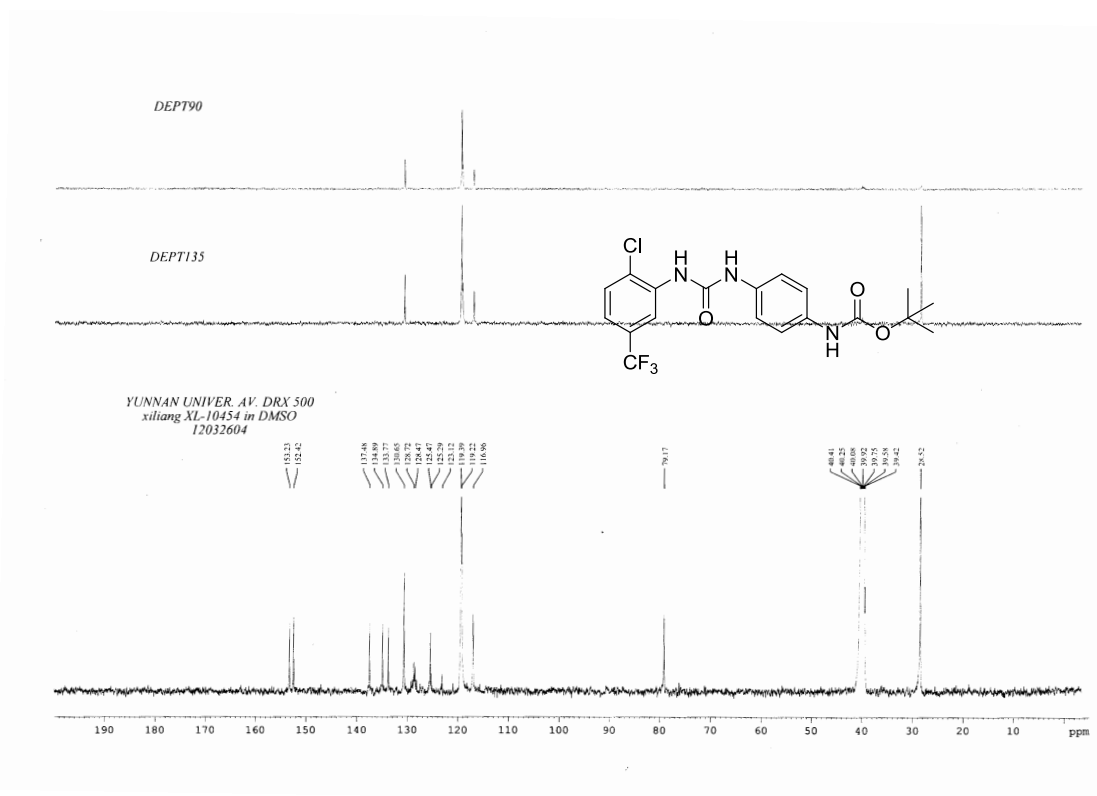

<sup>13</sup>C-NMR spectrum of 4f

Supporting Information

For

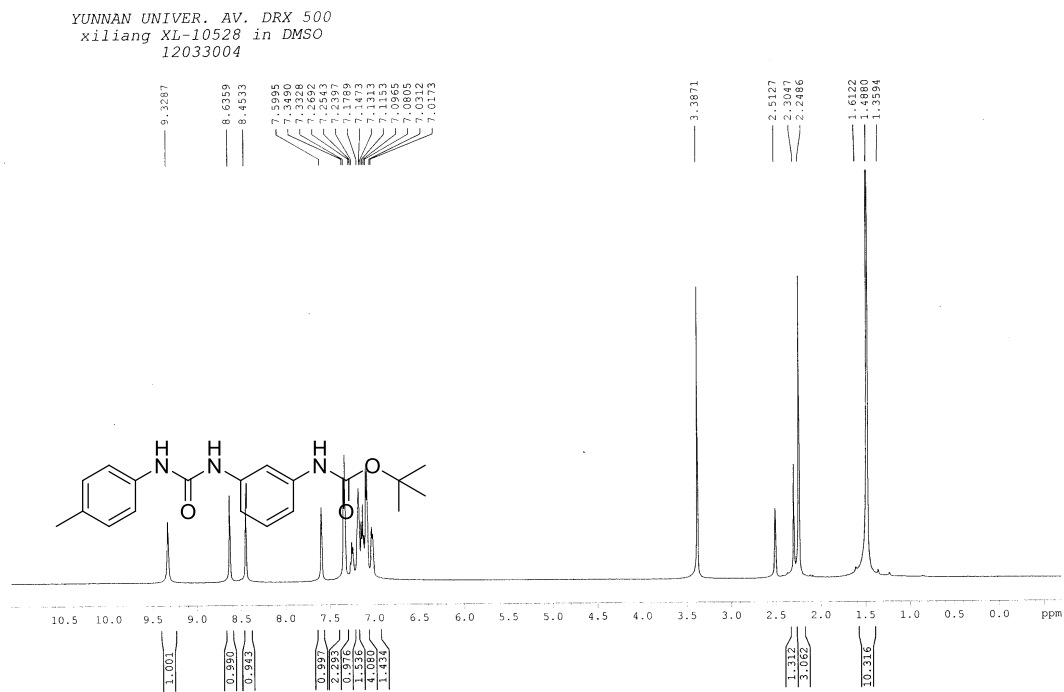

<sup>1</sup>H-NMR spectrum of 4g

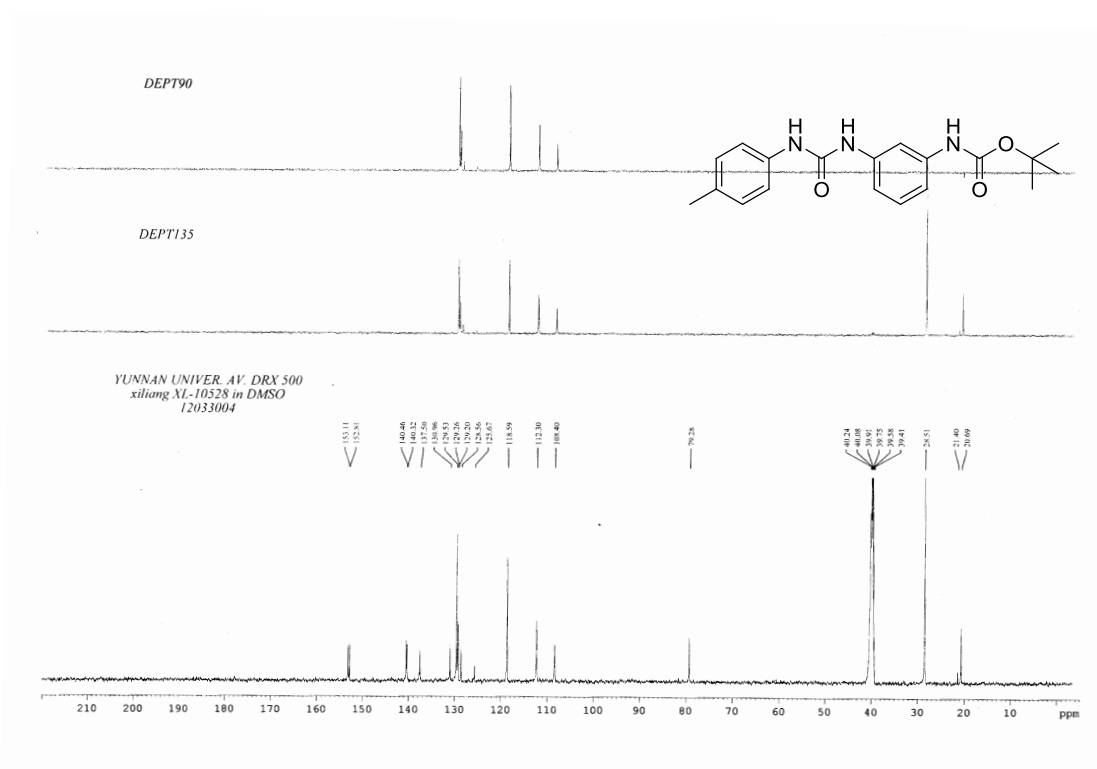

<sup>13</sup>C-NMR spectrum of 4g

For

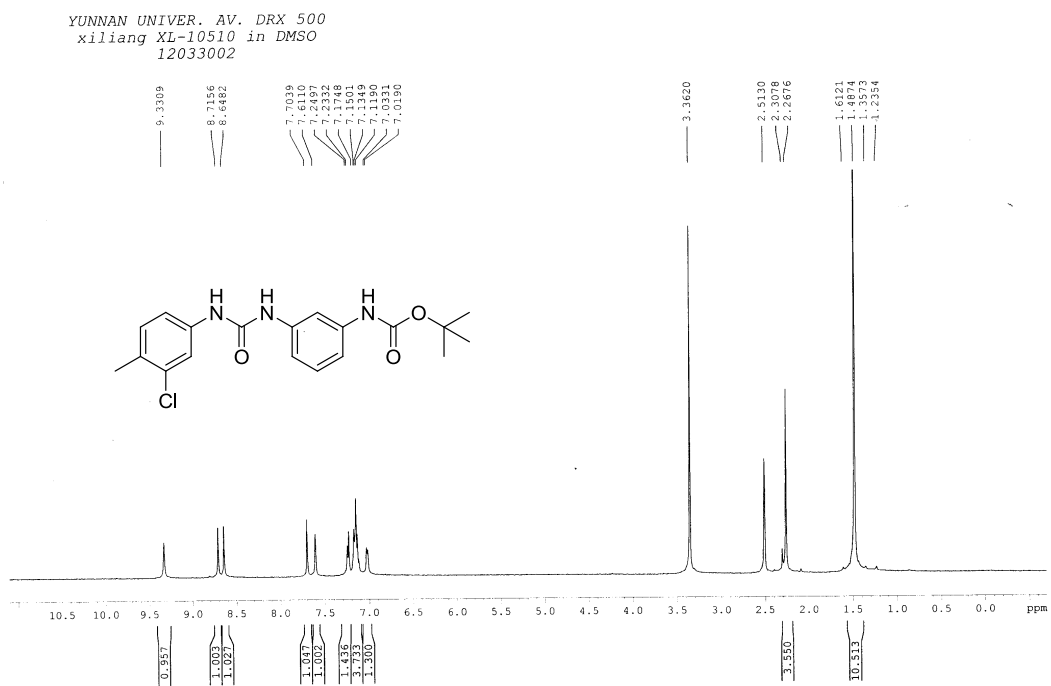

<sup>1</sup>H-NMR spectrum of 4h

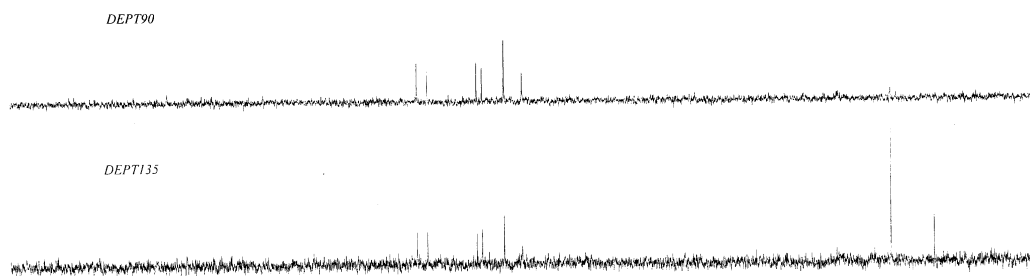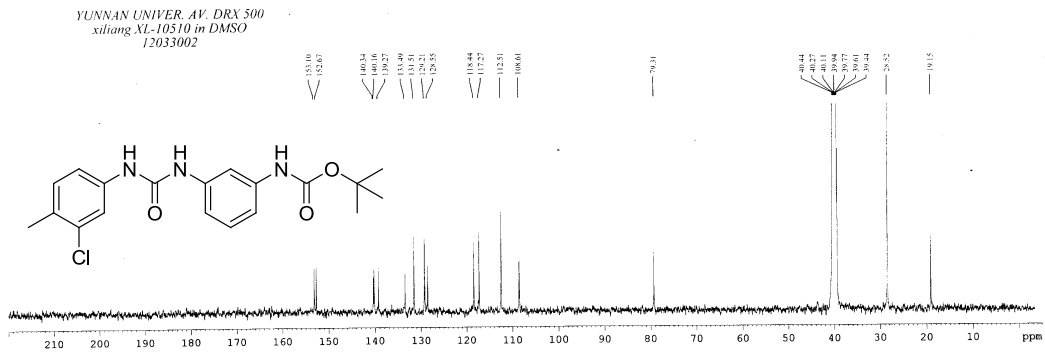

<sup>13</sup>C-NMR spectrum of 4h



Supporting Information

For

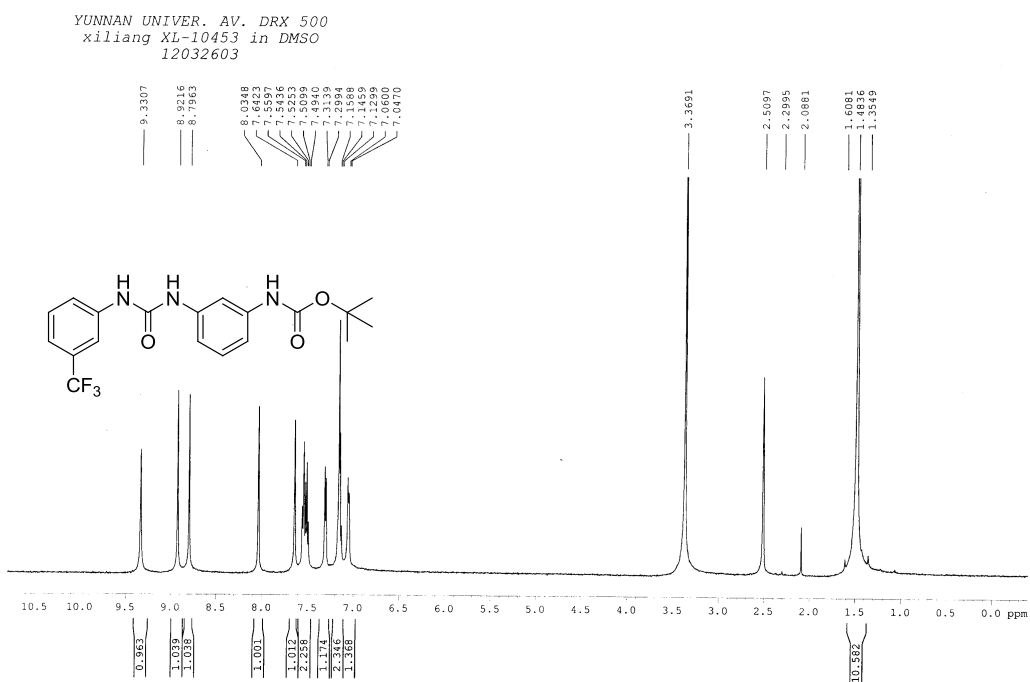

<sup>1</sup>H-NMR spectrum of 4i

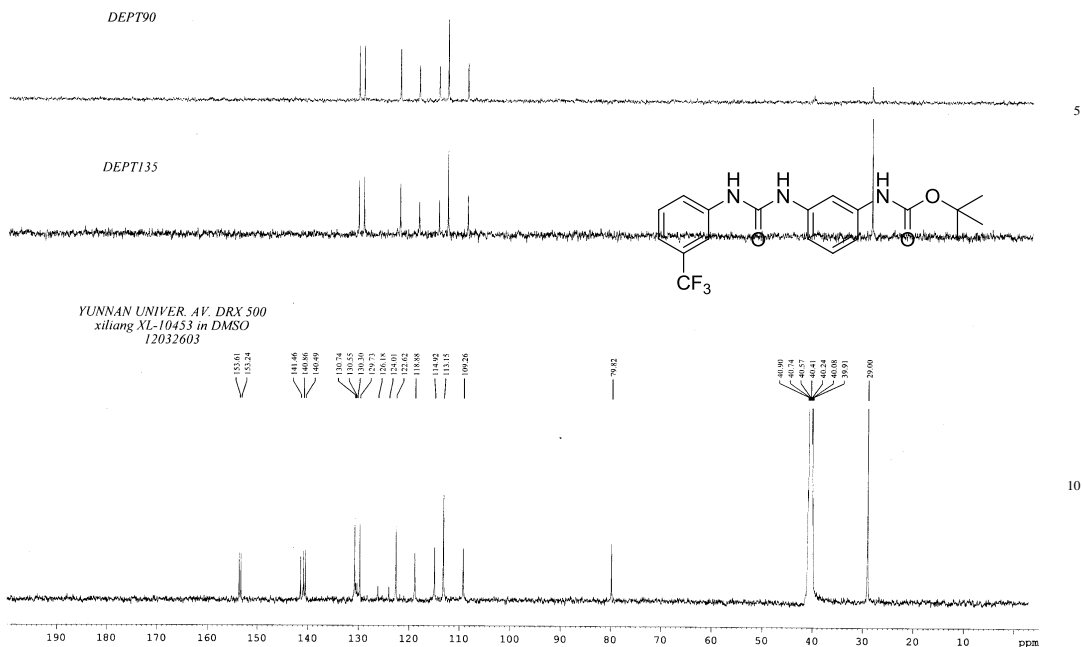

<sup>13</sup>C-NMR spectrum of 4i

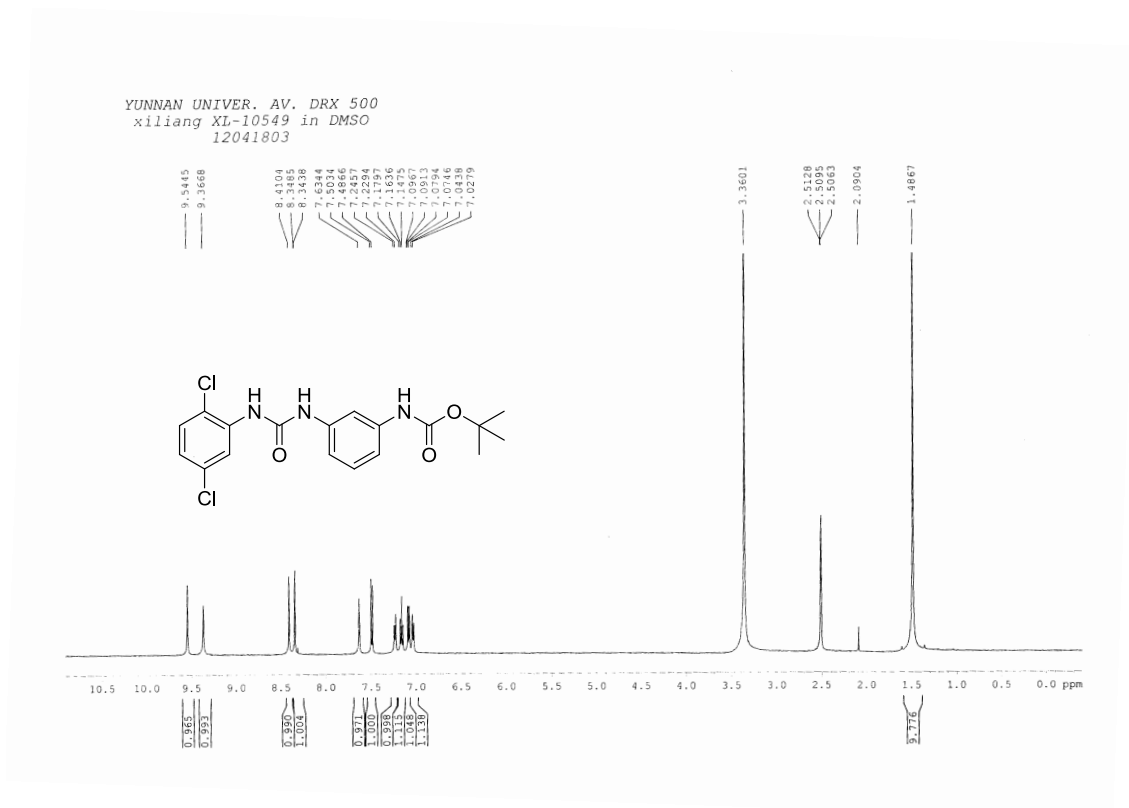

<sup>1</sup>H-NMR spectrum of 4j

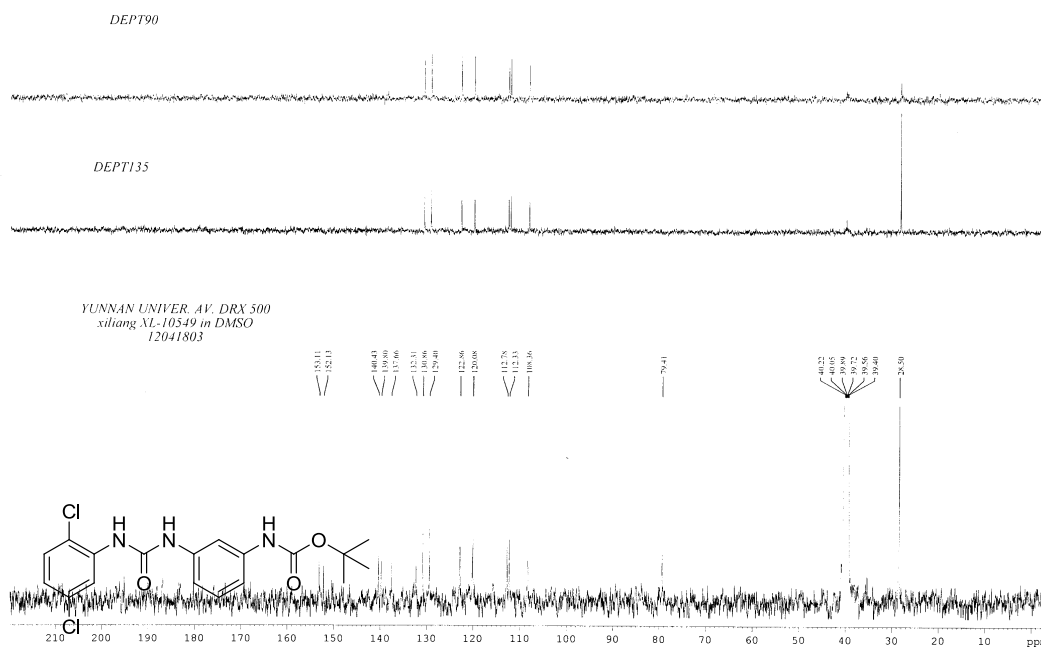

<sup>13</sup>C-NMR spectrum of 4j

Supporting Information  
For

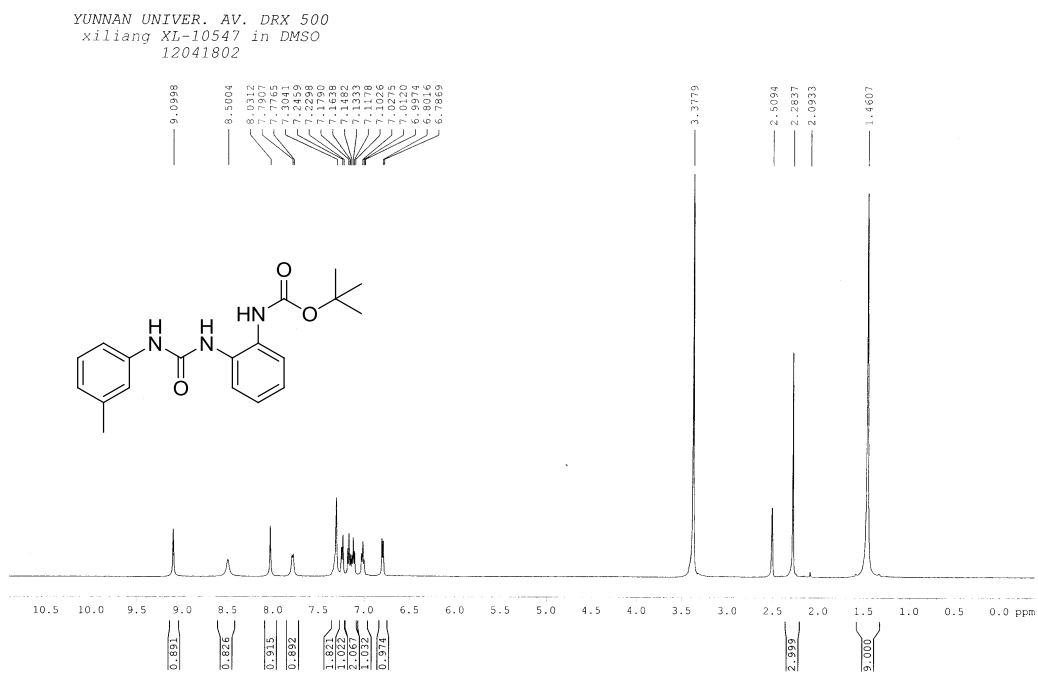

<sup>1</sup>H-NMR spectrum of 4I

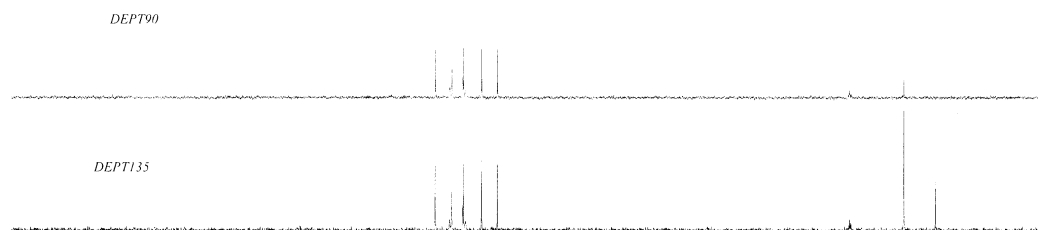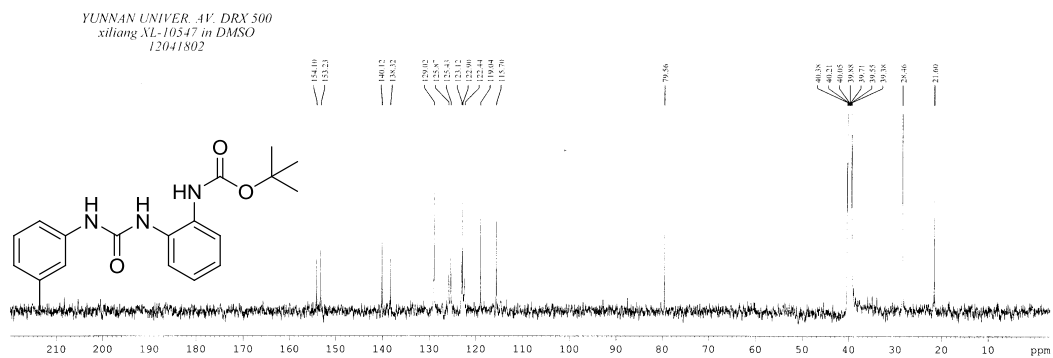

<sup>13</sup>C-NMR spectrum of 4I

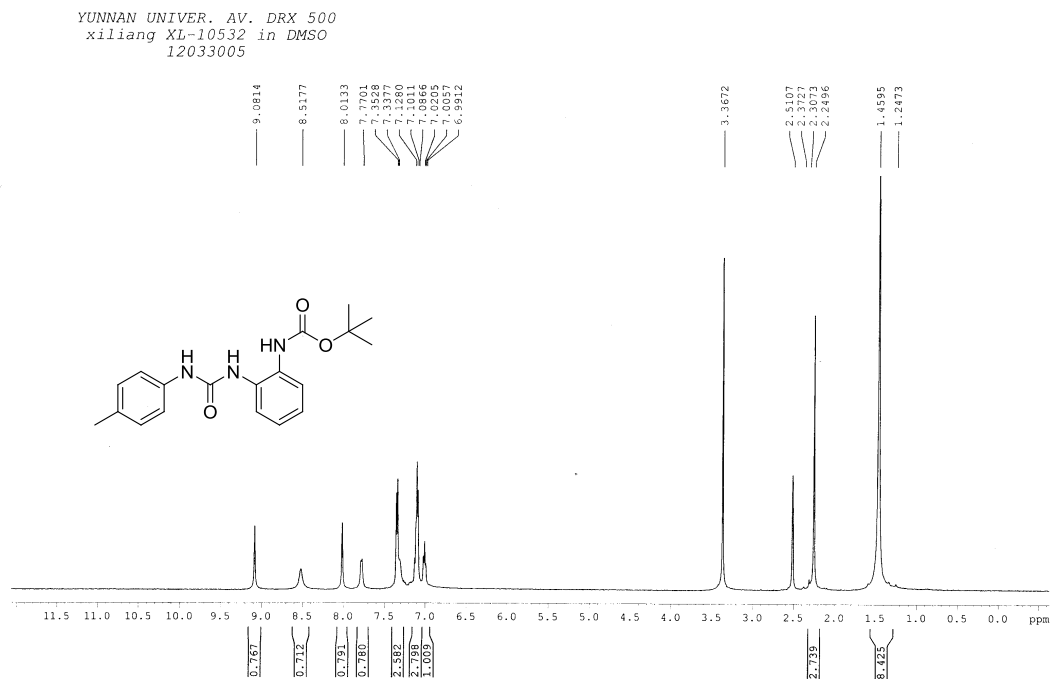

<sup>1</sup>H-NMR spectrum of 4m

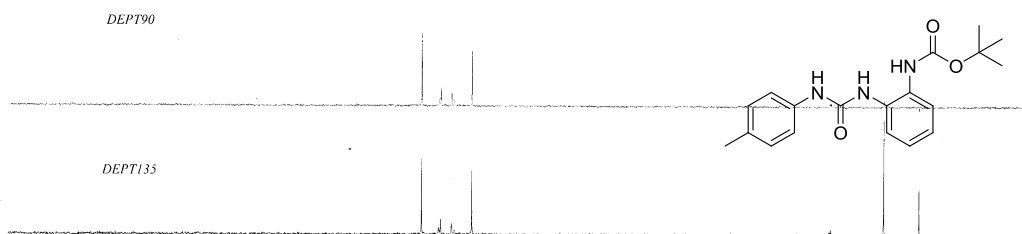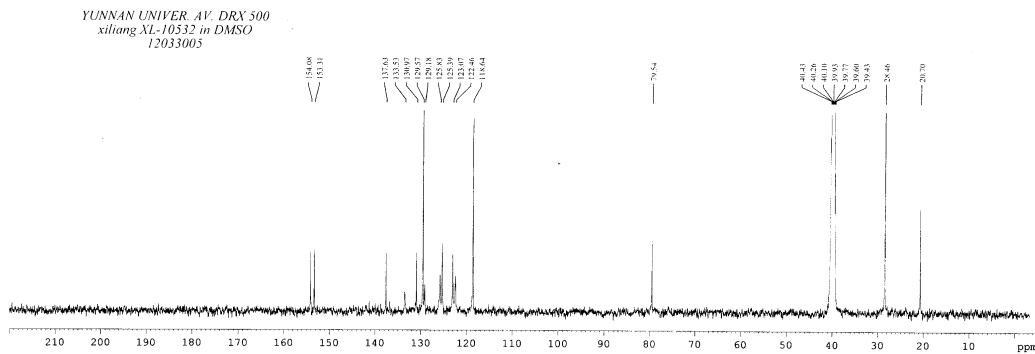

<sup>13</sup>C-NMR spectrum of 4m

## Supporting Information

For

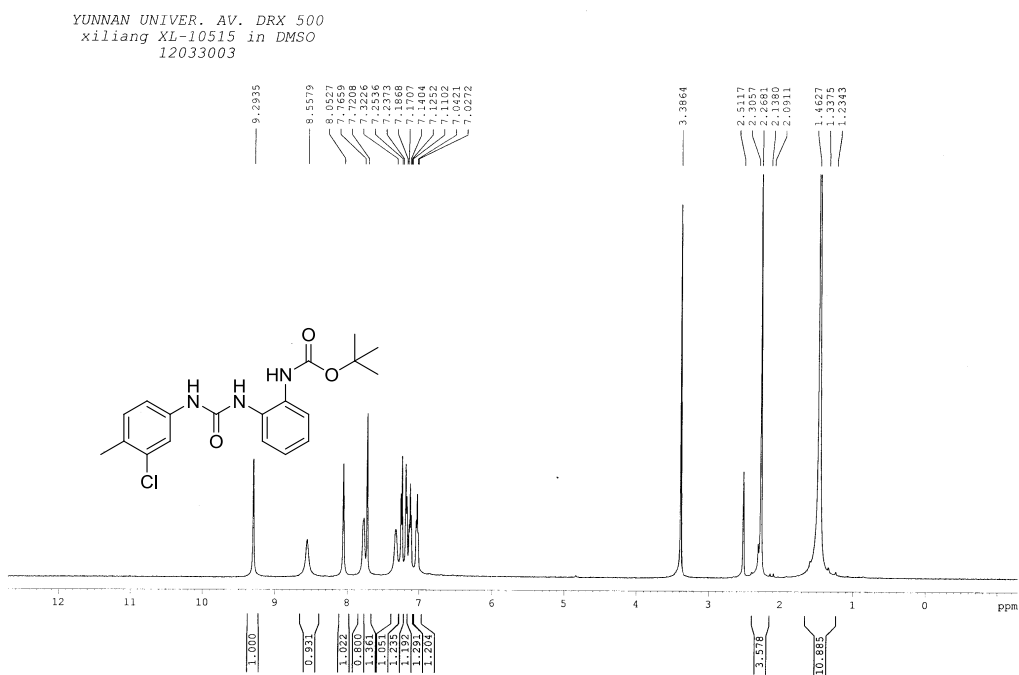

## <sup>1</sup>H-NMR spectrum of 4n

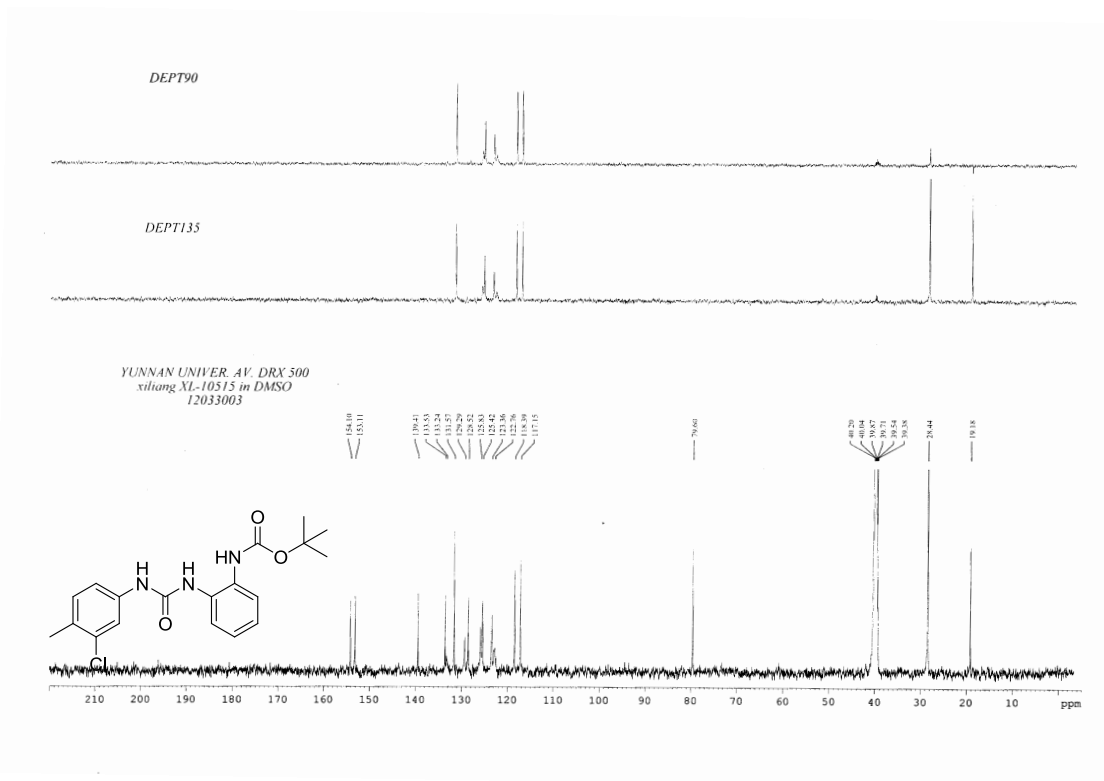

## <sup>13</sup>C-NMR spectrum of 4n

For

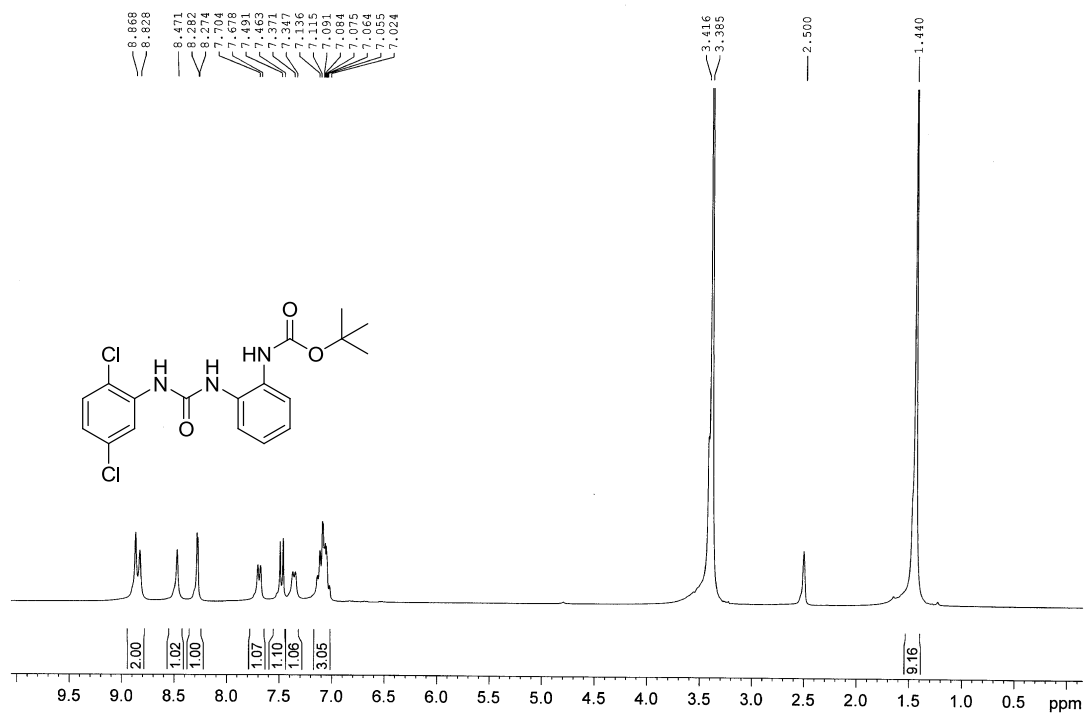

**<sup>1</sup>H-NMR spectrum of 4p**

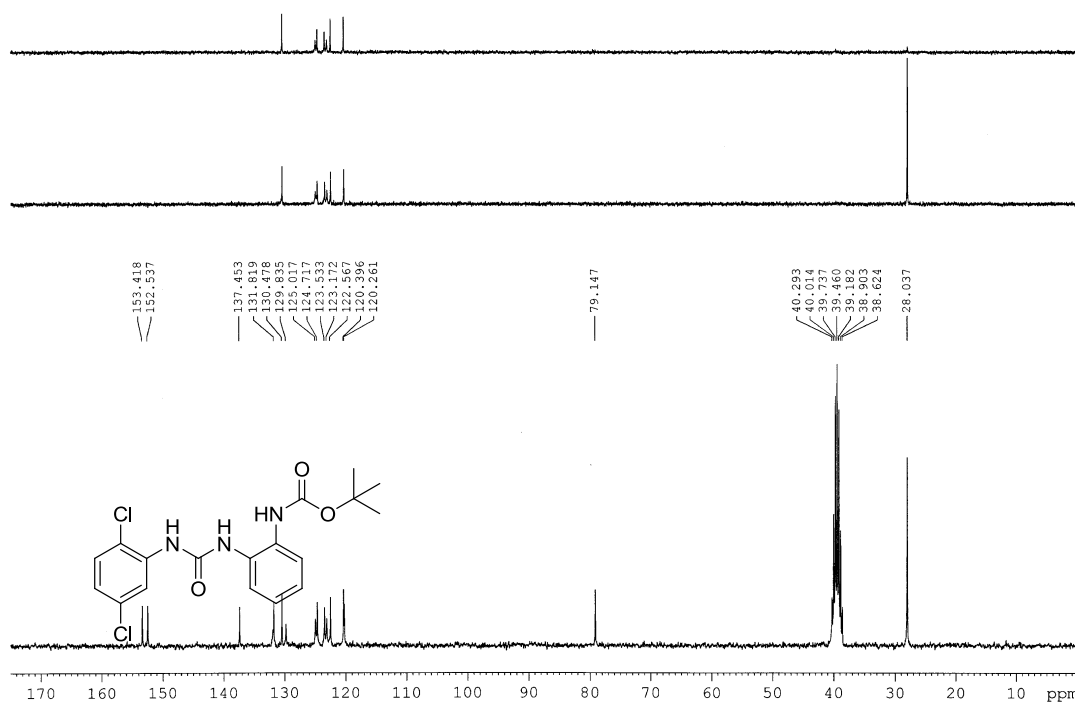

**<sup>13</sup>C-NMR spectrum of 4p**

Supporting Information

For

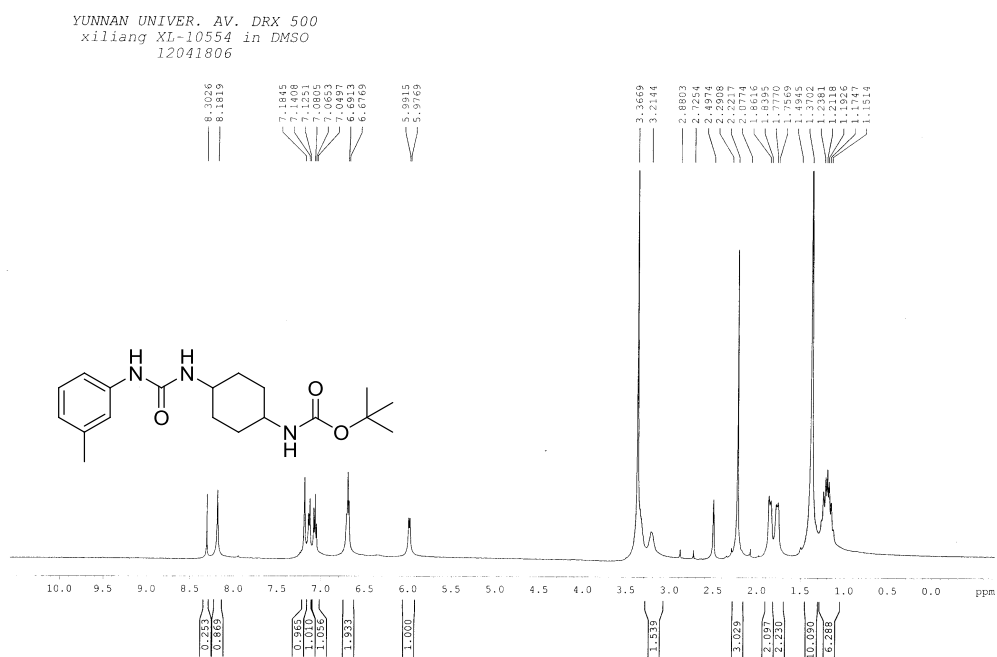

<sup>1</sup>H-NMR spectrum of q

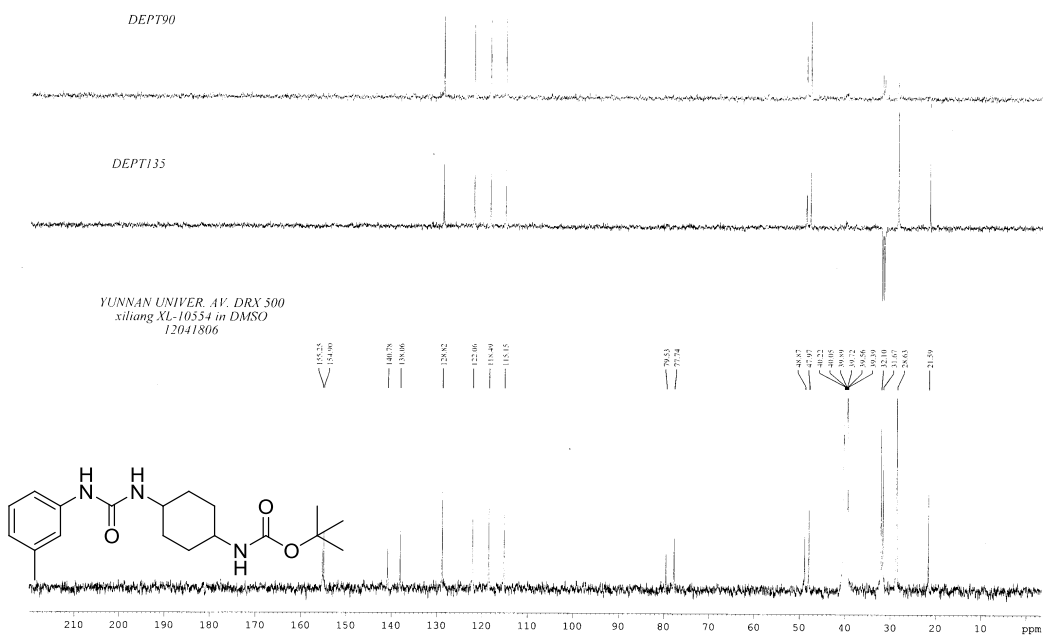

<sup>13</sup>C-NMR spectrum of 4q

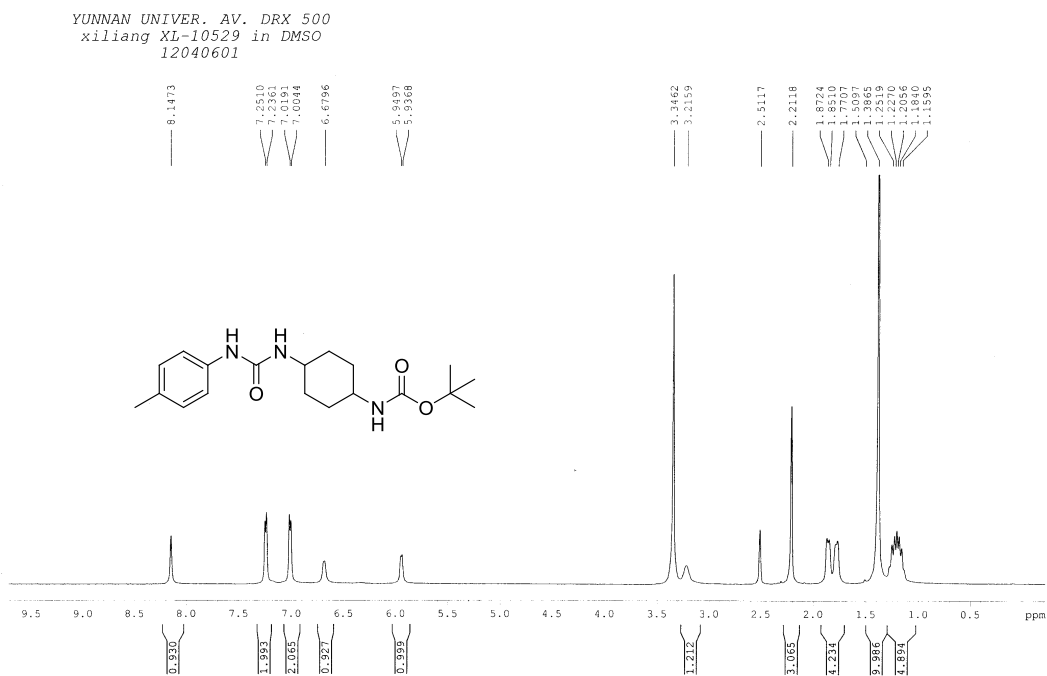

<sup>1</sup>H-NMR spectrum of 4r

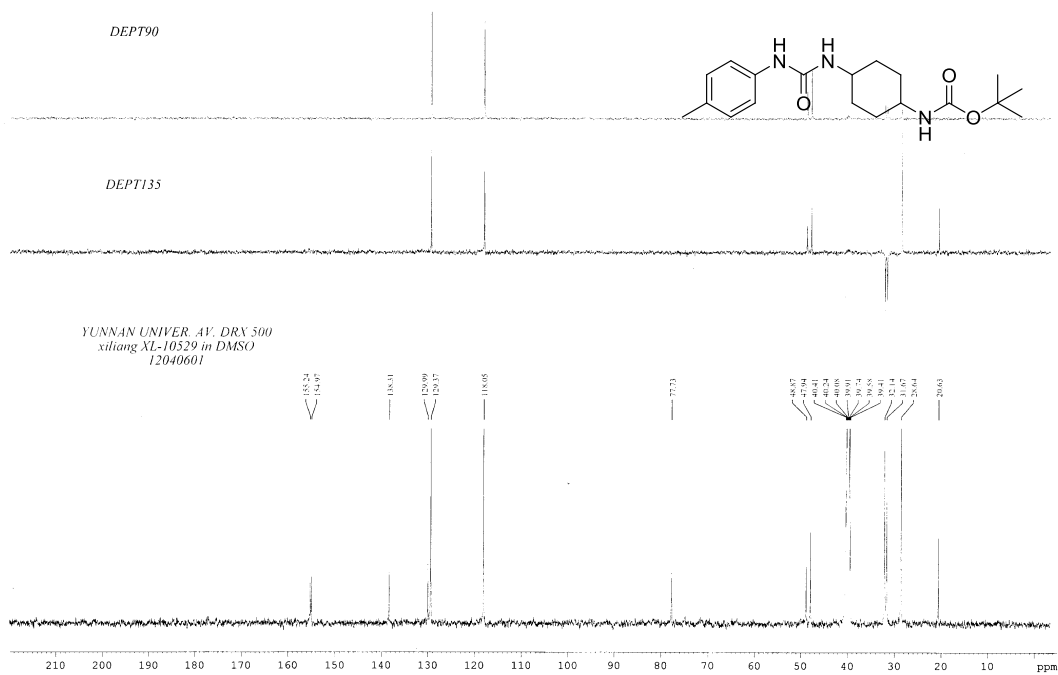

<sup>13</sup>C-NMR spectrum of 4r



### Supporting Information

For

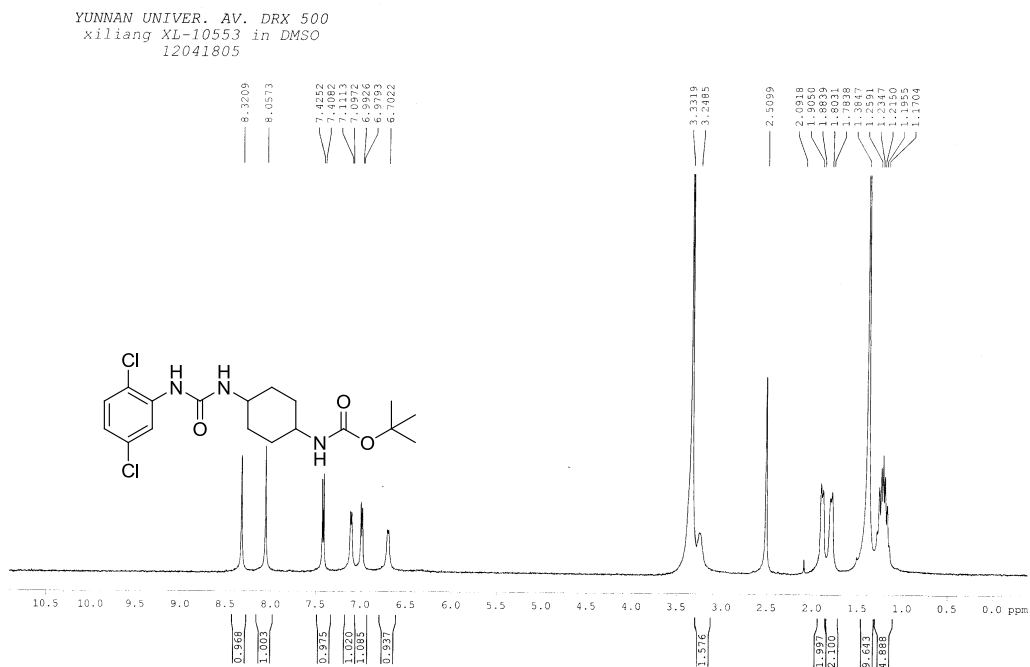

<sup>1</sup>H-NMR spectrum of 4s

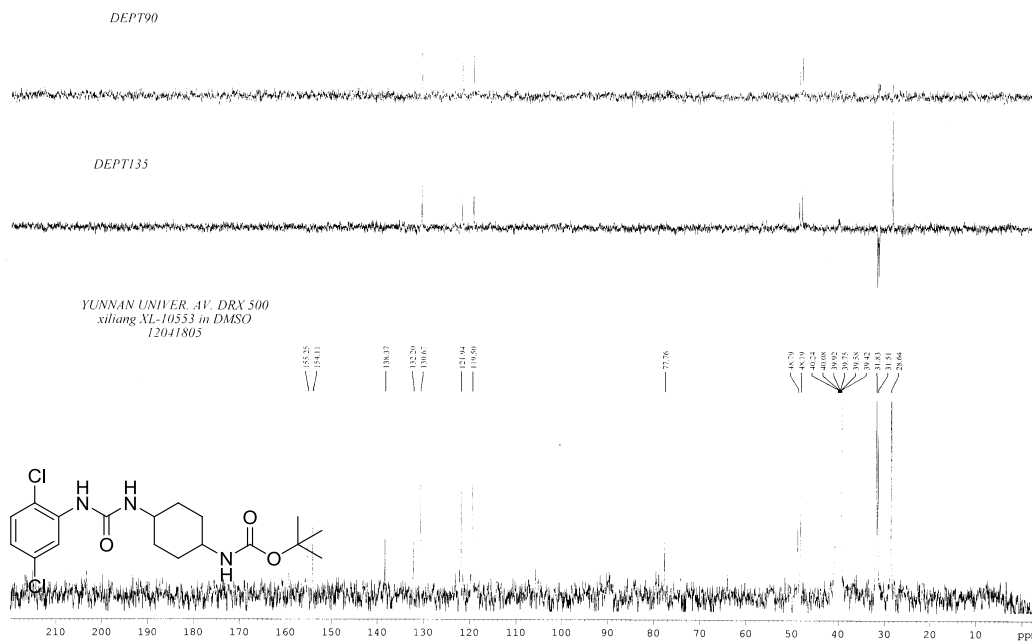

<sup>13</sup>C-NMR spectrum of 4s

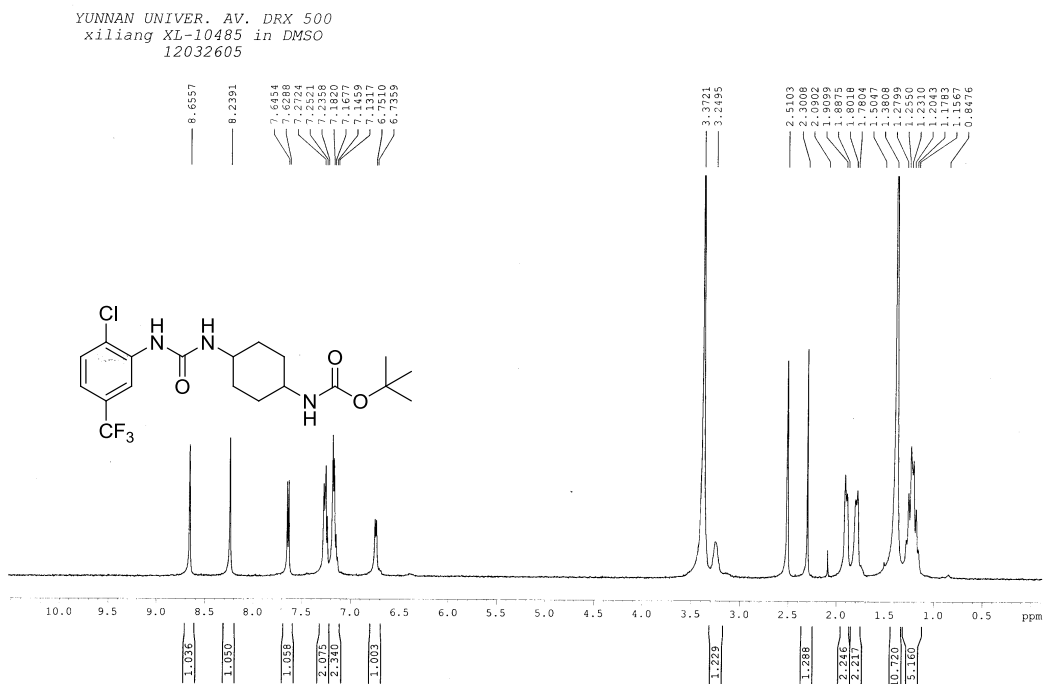

<sup>1</sup>H-NMR spectrum of 4t

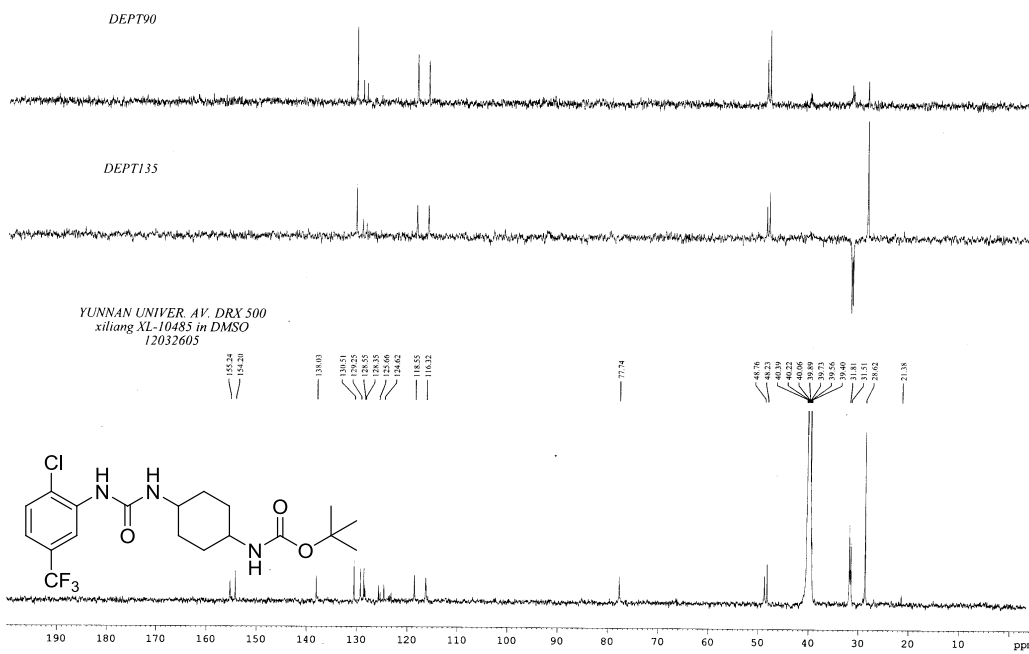

<sup>13</sup>C-NMR spectrum of 4t

### Supporting Information

For

YUNNAN UNIVER. AV. DRX 500  
xiliang XL-10530 in DMSO  
12040602

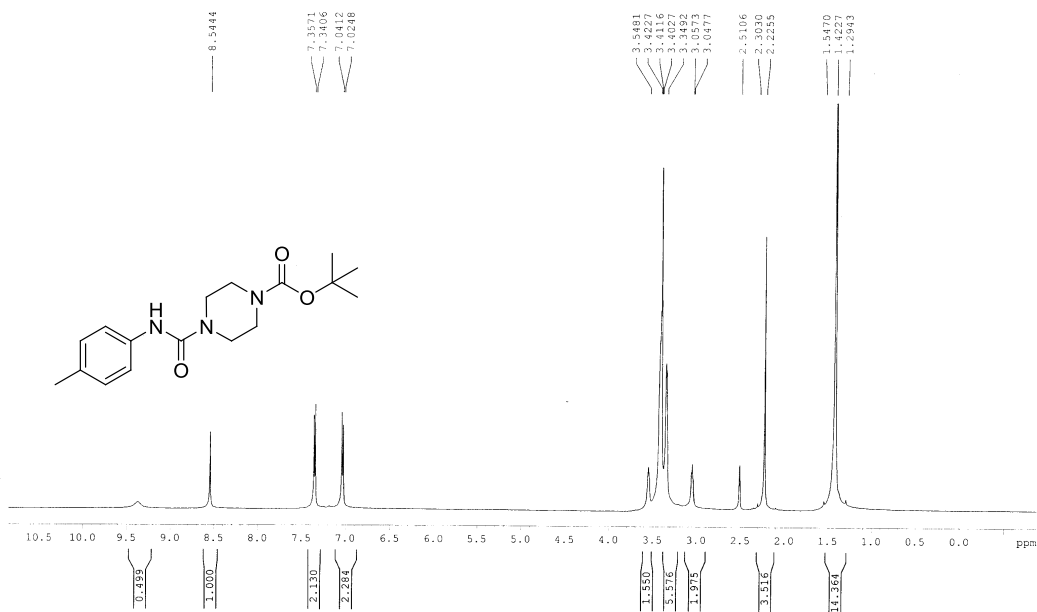

### <sup>1</sup>H-NMR spectrum of 4u

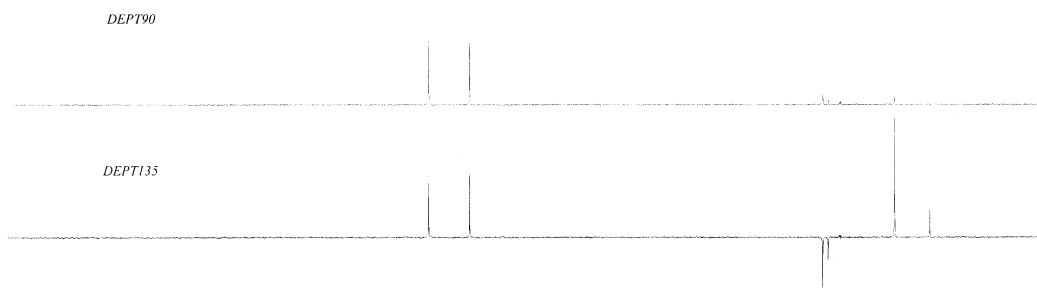

YUNNAN UNIVER. AV. DRX 500  
xiliang XL-10530 in DMSO  
12040602

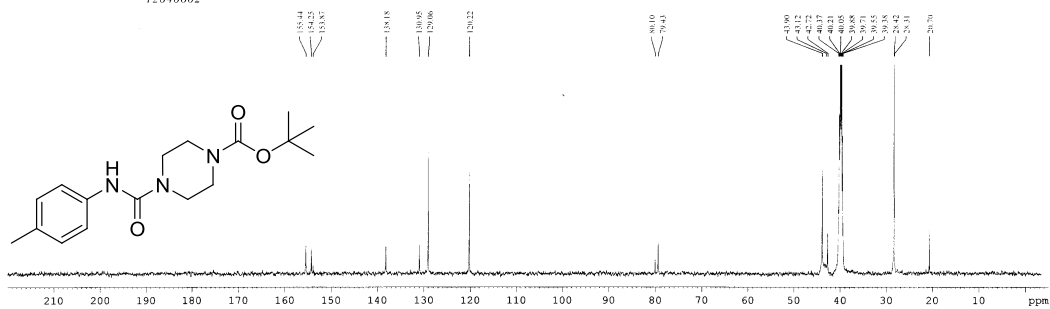

### <sup>13</sup>C-NMR spectrum of 4u

For

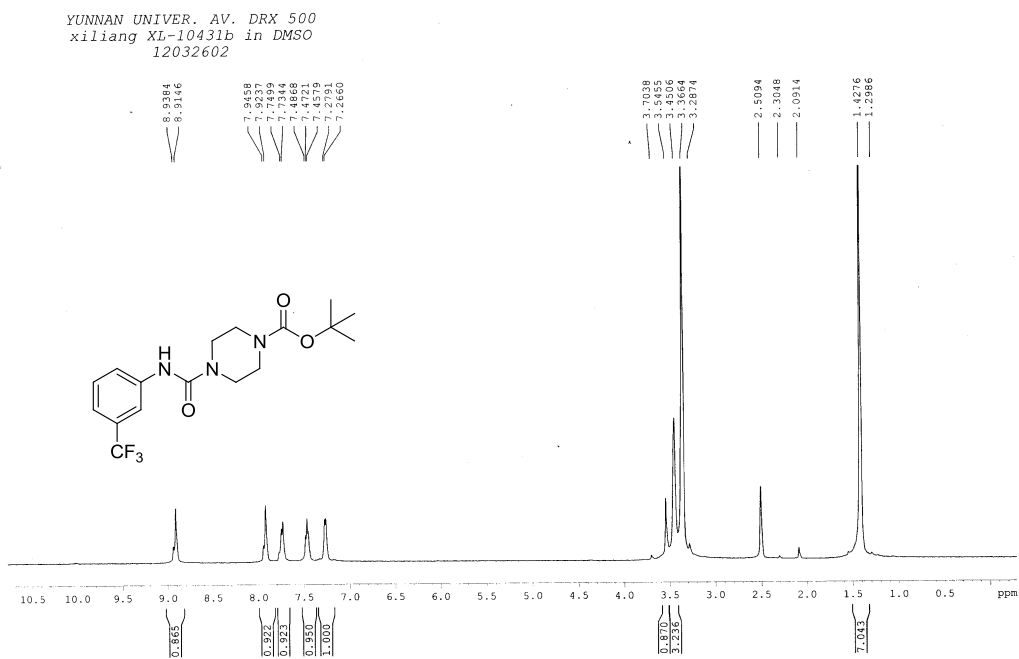

<sup>1</sup>H-NMR spectrum of 4v

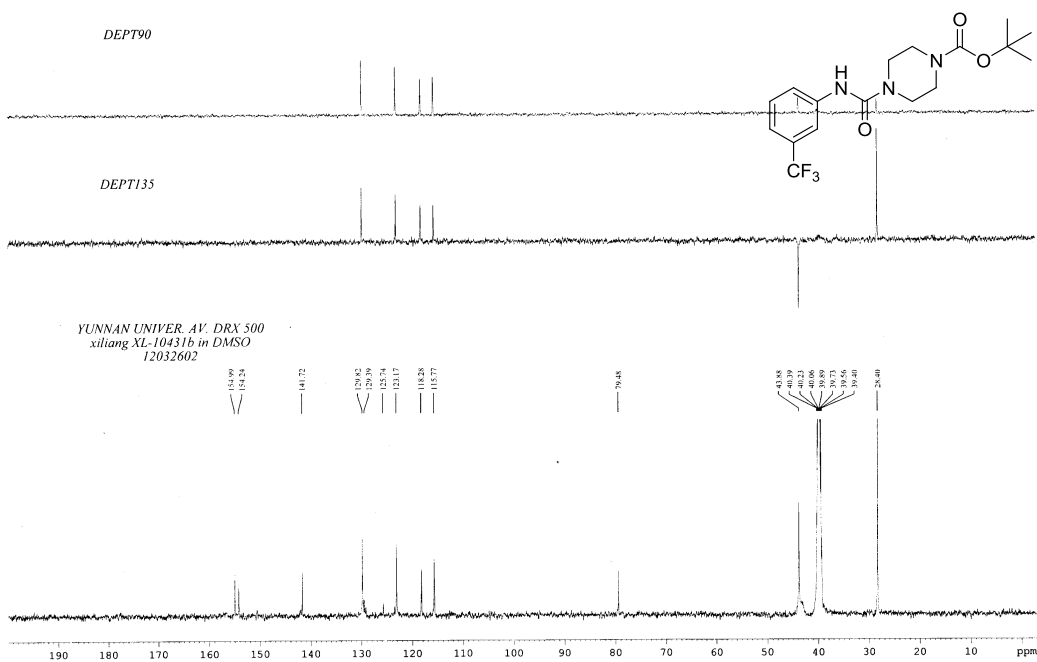

<sup>13</sup>C-NMR spectrum of 4v

Supporting Information

For

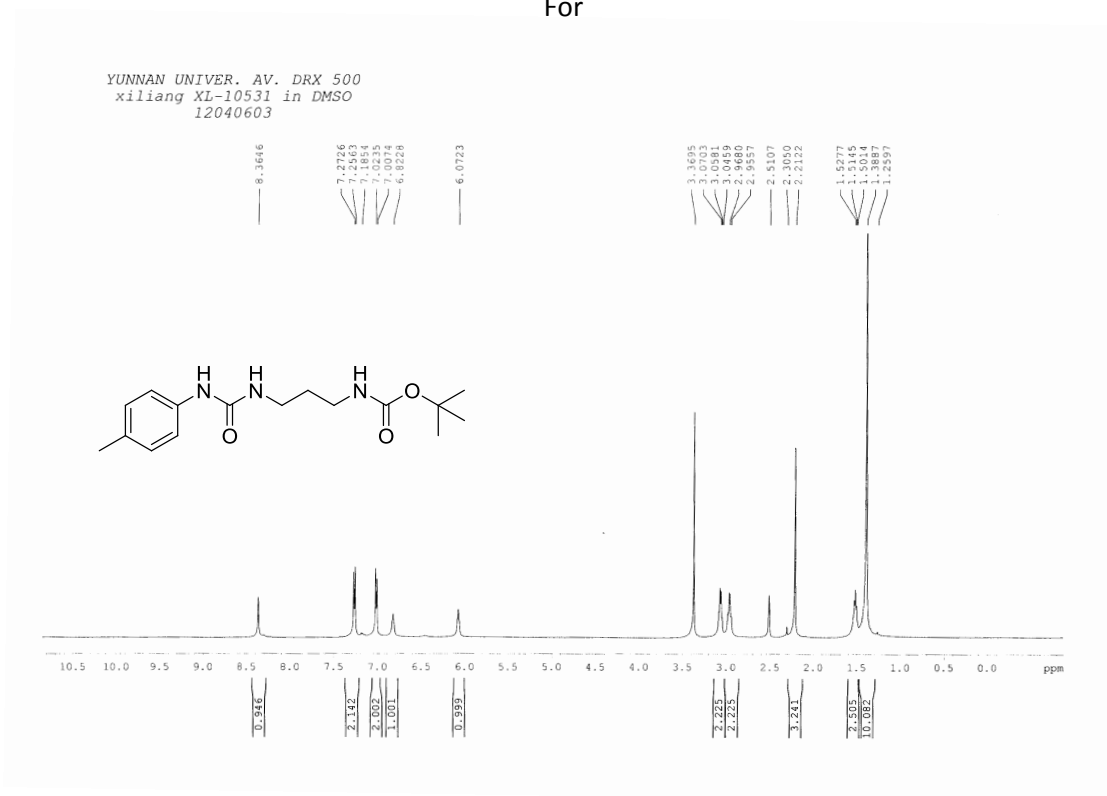

<sup>1</sup>H-NMR spectrum of 4x

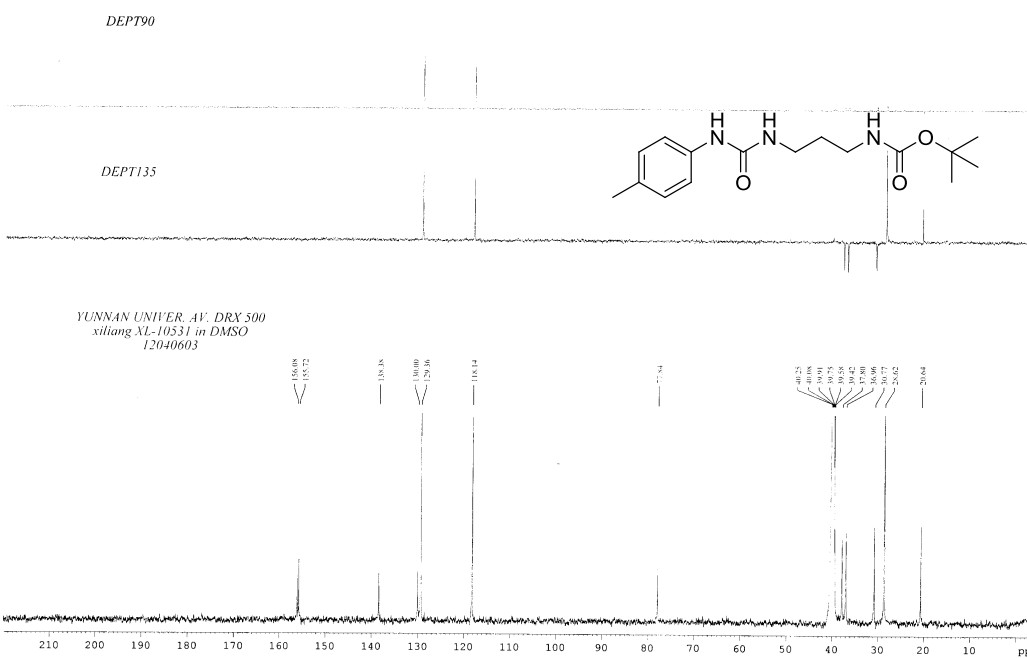

<sup>13</sup>C-NMR spectrum of 4x

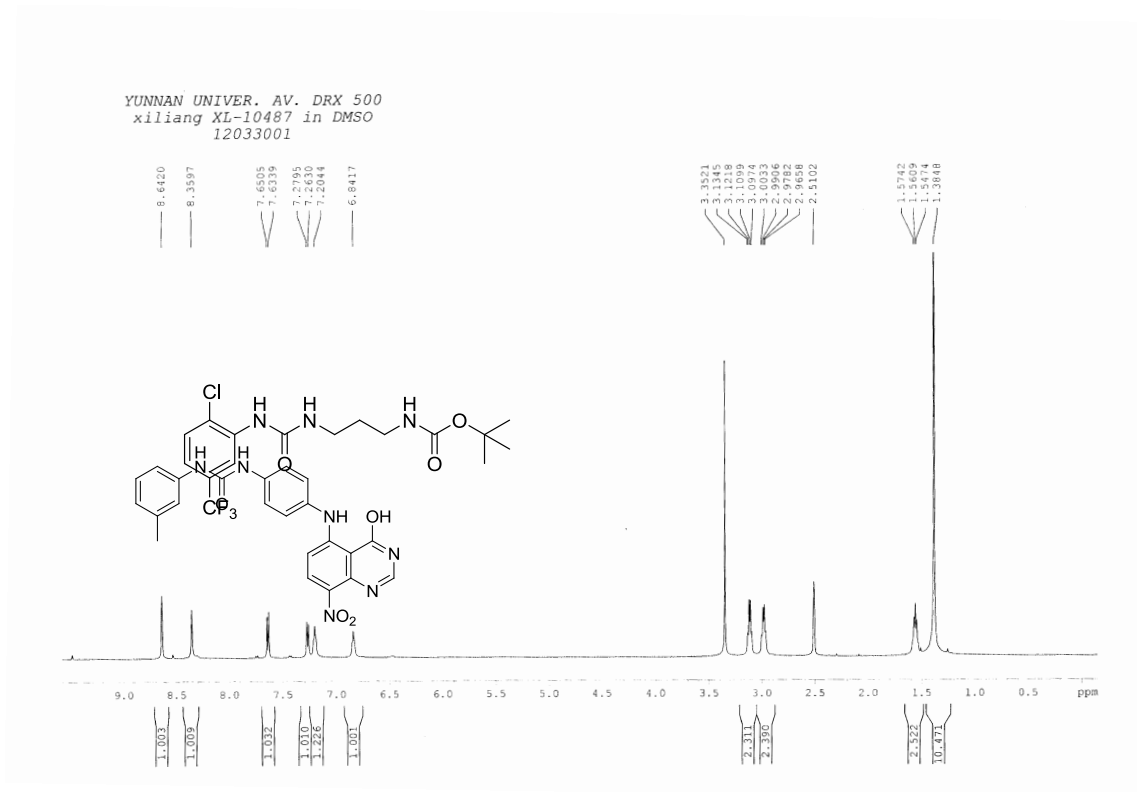

<sup>1</sup>H-NMR spectrum of 4z

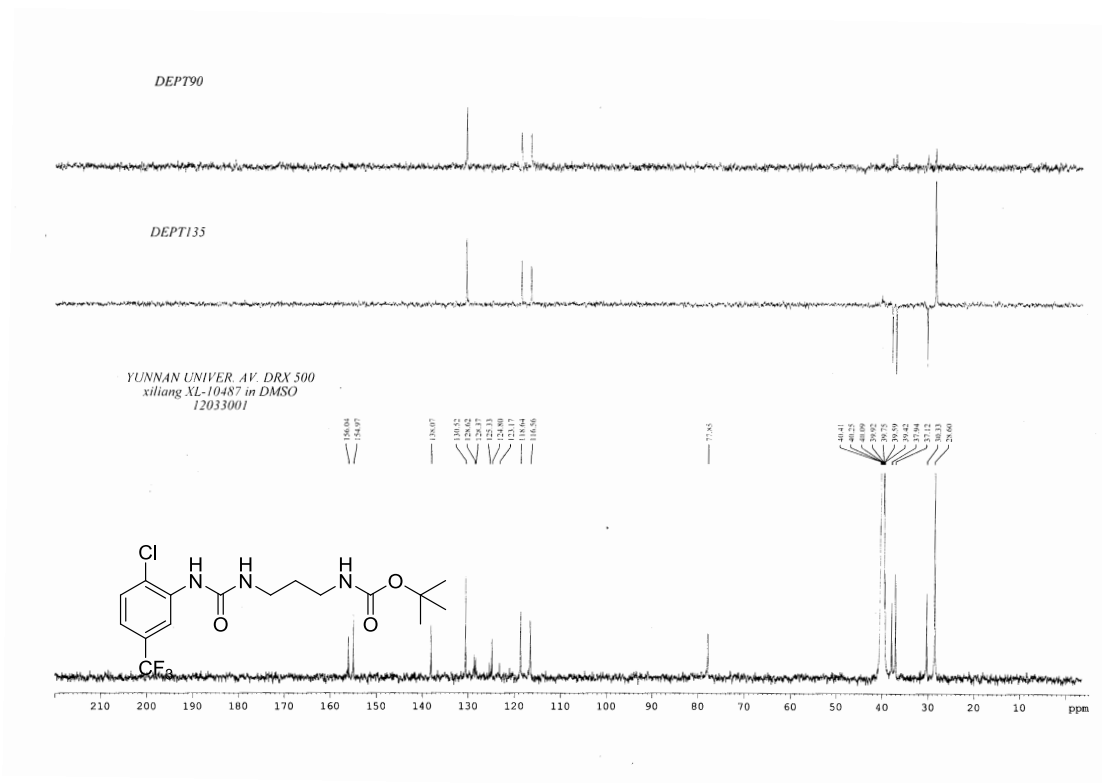

<sup>13</sup>C-NMR spectrum of 4z

### Supporting Information

For

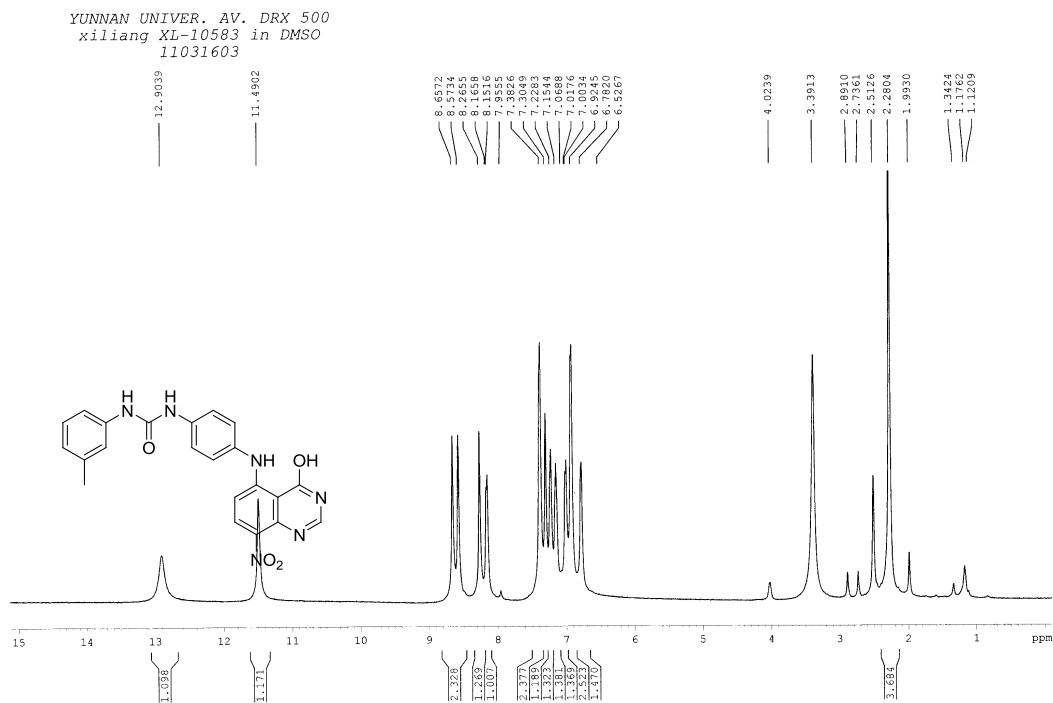

### <sup>1</sup>H-NMR spectrum of 6a

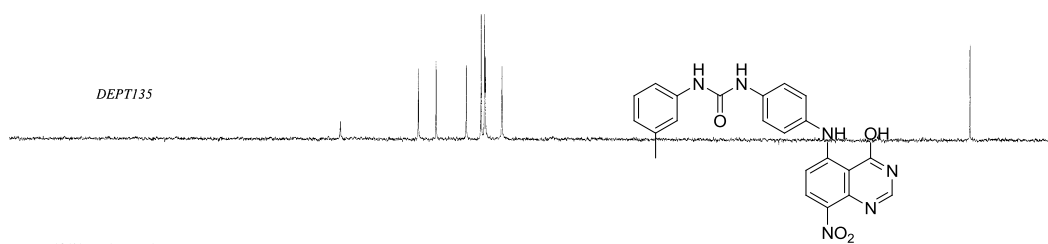

YUNNAN UNIVER. AV. DRX 500  
xiliang XL-10583 in DMSO  
11031603

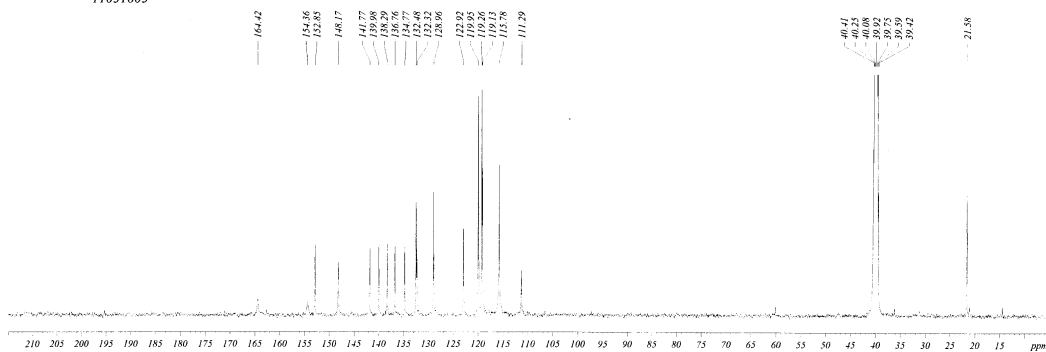

### <sup>13</sup>C-NMR spectrum of 6a

For

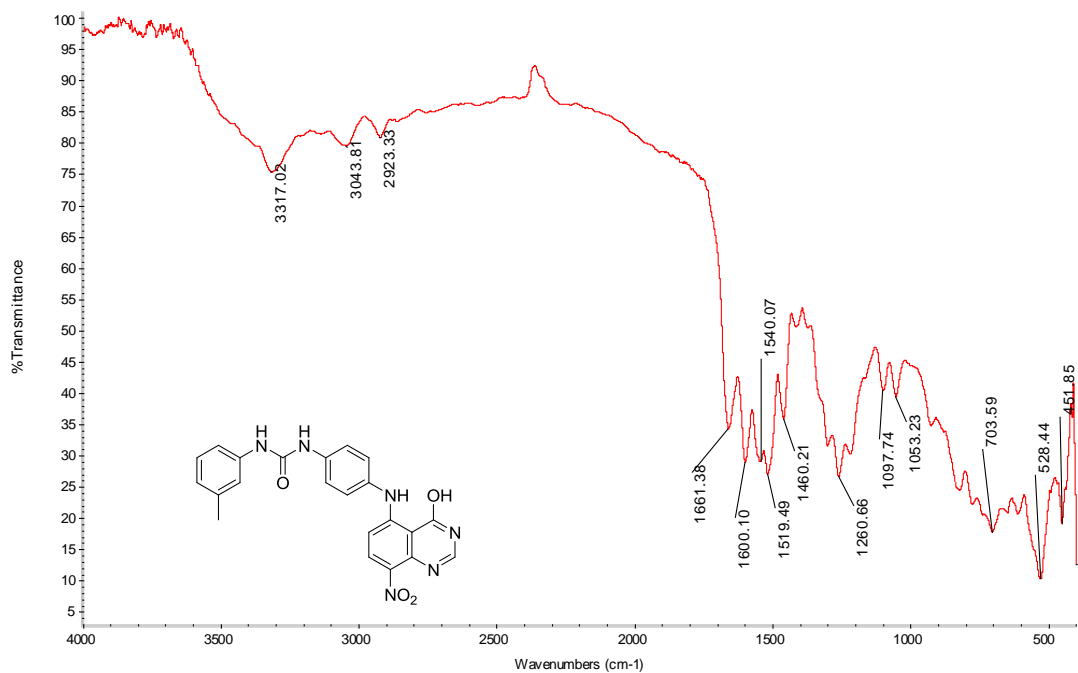

IR spectrum of 6a

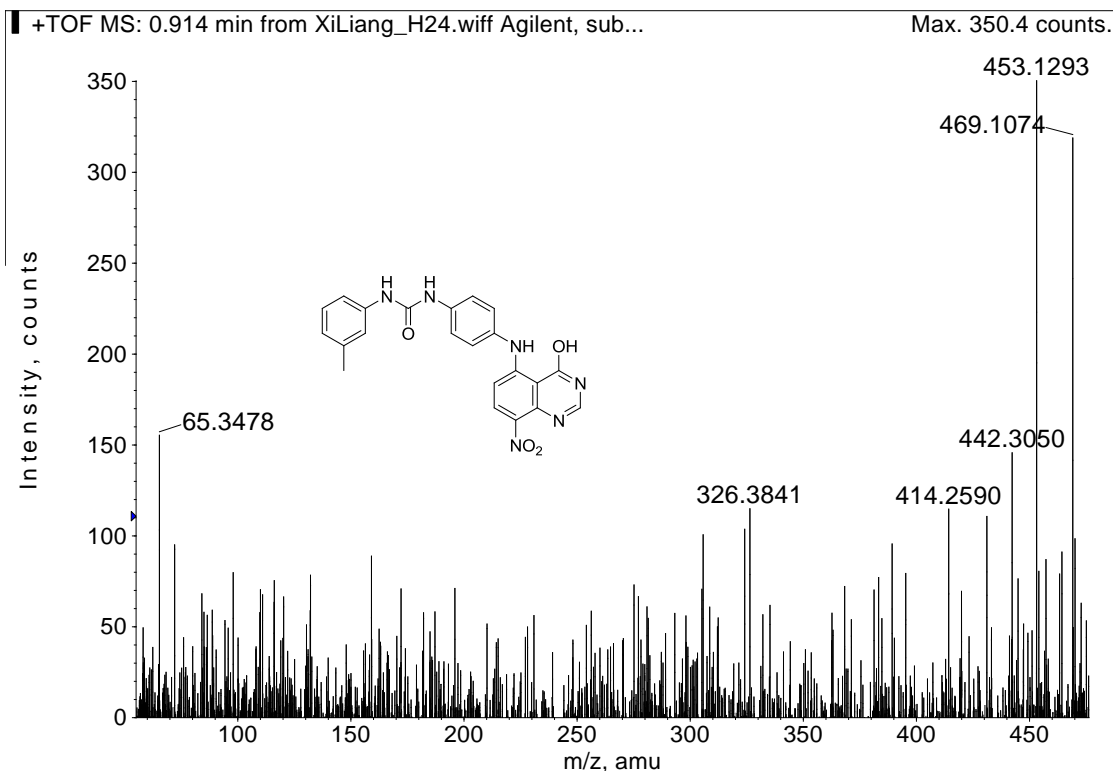

MS spectrum of 6a



Supporting Information  
For

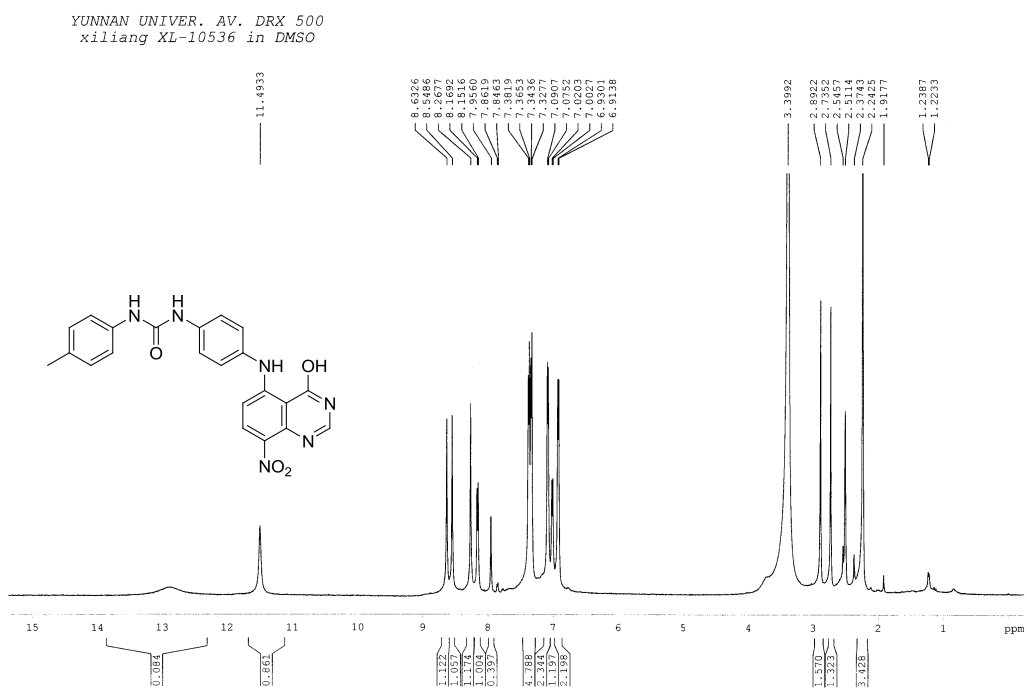

<sup>1</sup>H-NMR spectrum of 6b

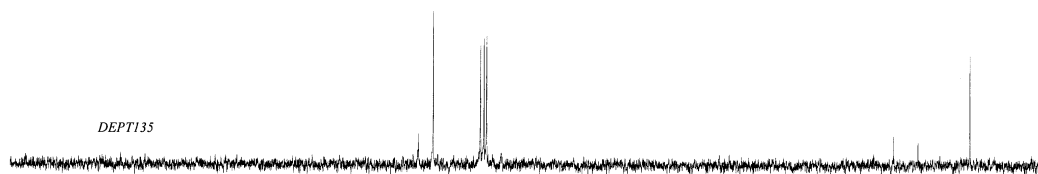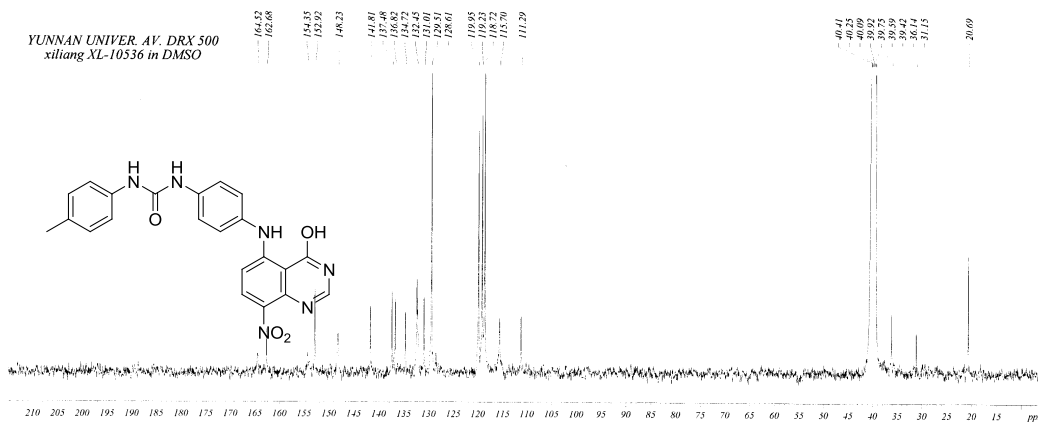

<sup>13</sup>C-NMR spectrum of 6b

For

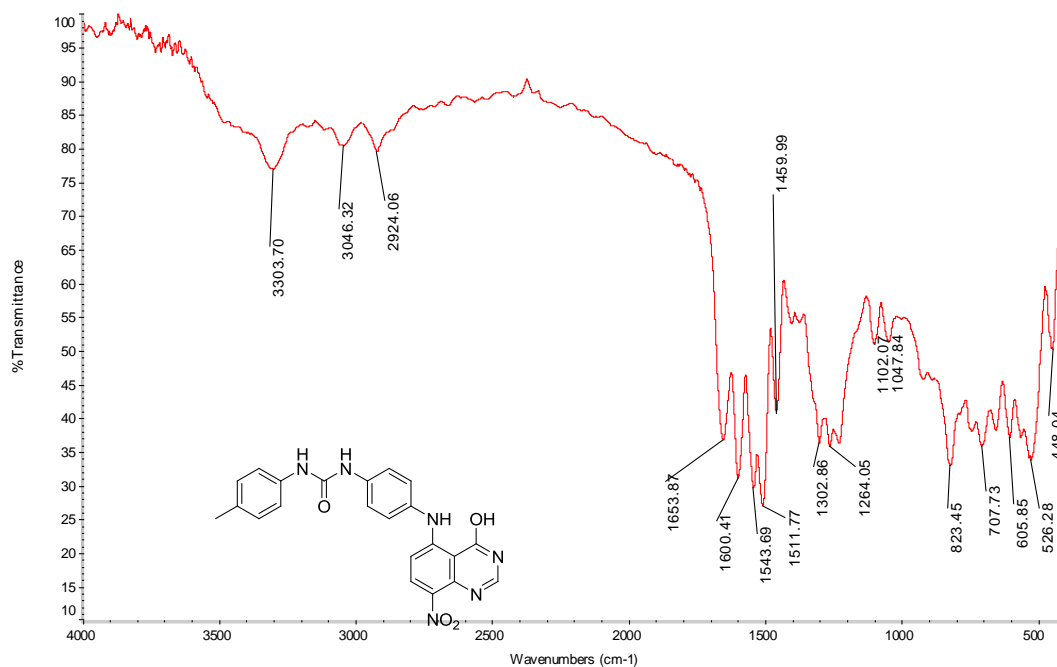

IR spectrum of 6b

YUNNAN UNIVER. AV. DRX 500  
 xiliang XL-10507 in DMSO

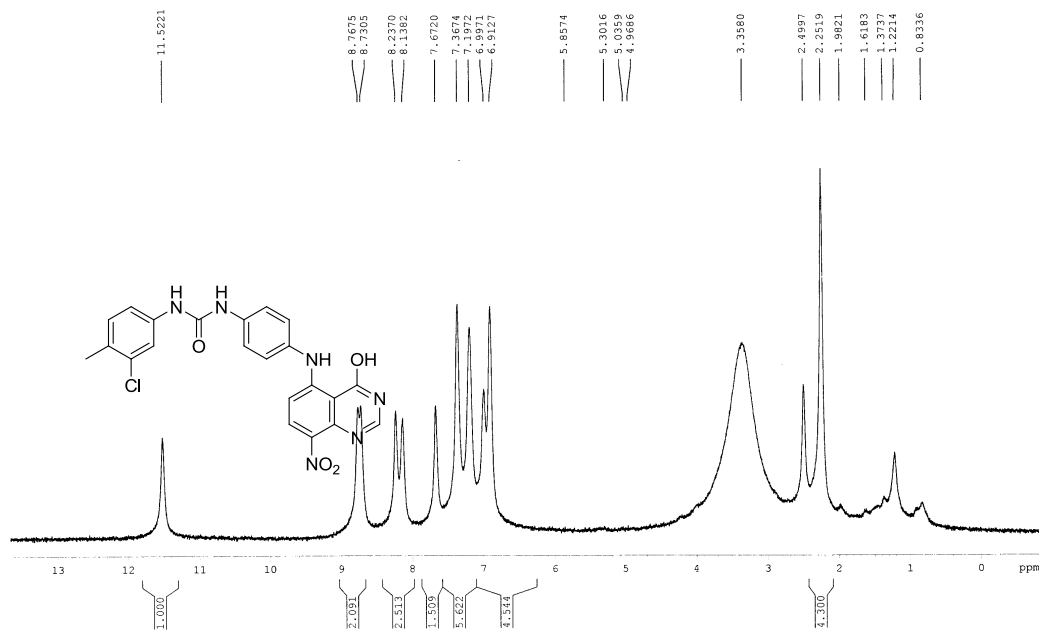

<sup>1</sup>H-NMR spectrum of 6c

### Supporting Information

For

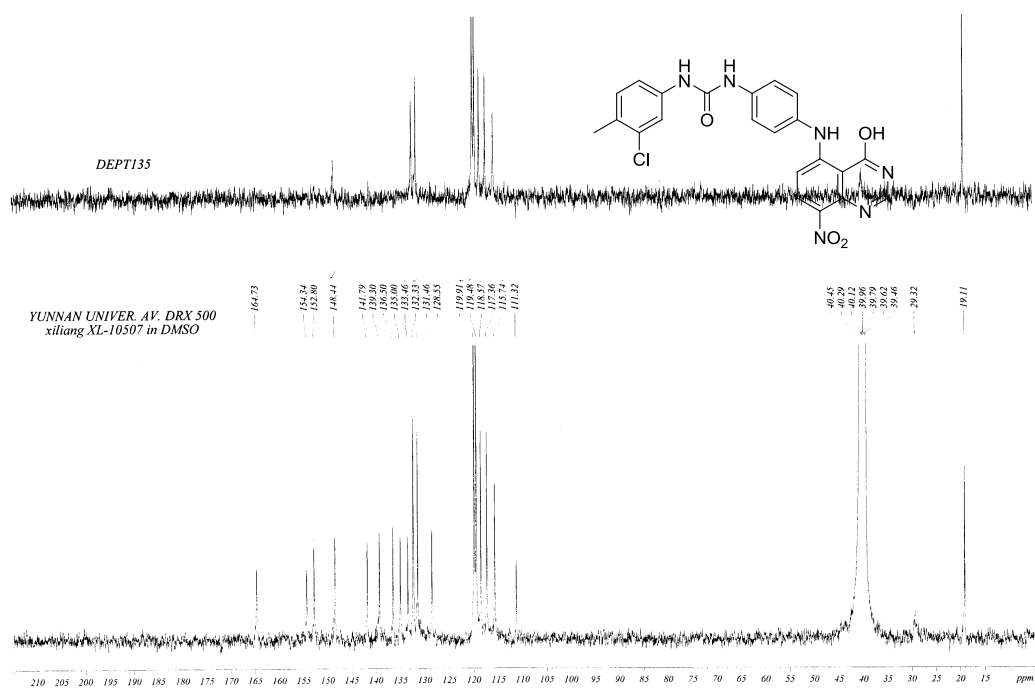

### <sup>13</sup>C-NMR spectrum of 6c

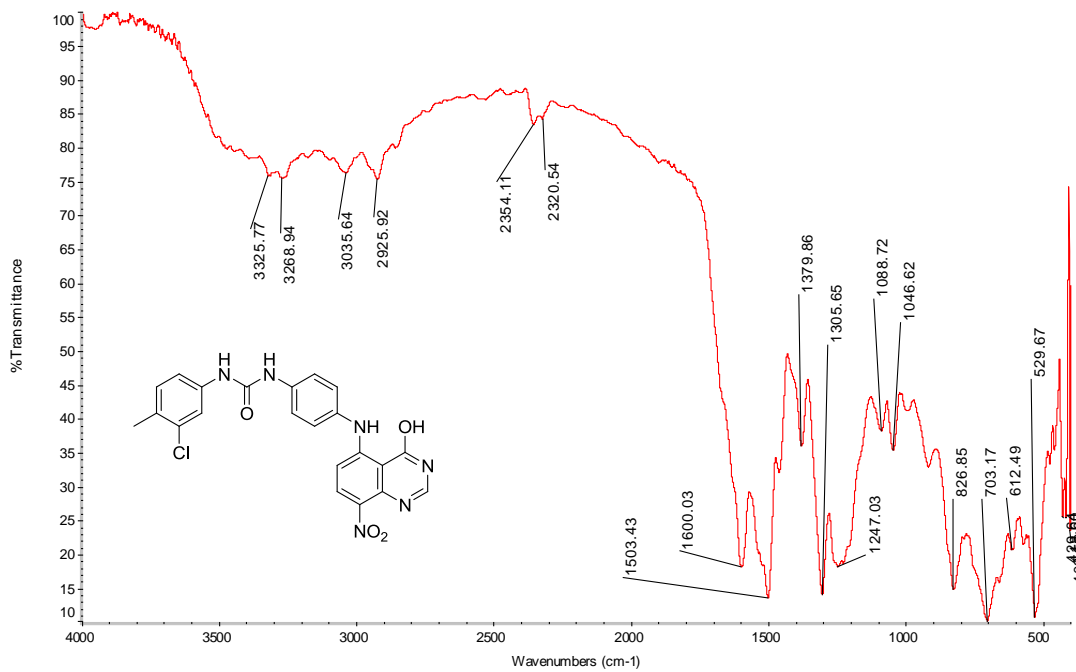

### IR spectrum of 6c

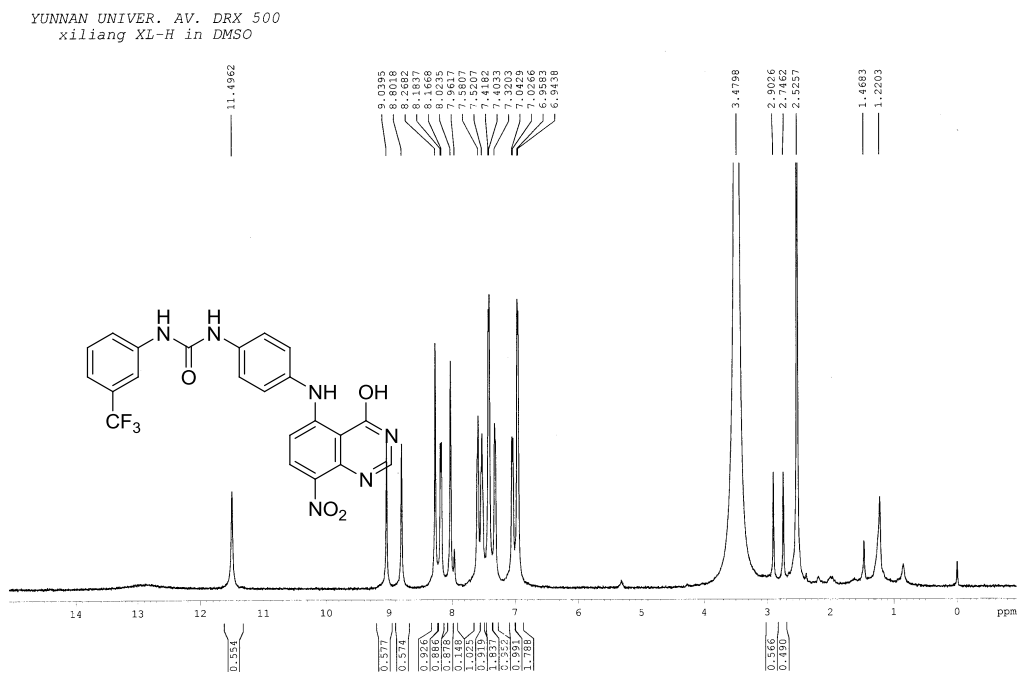

<sup>1</sup>H-NMR spectrum of 6d

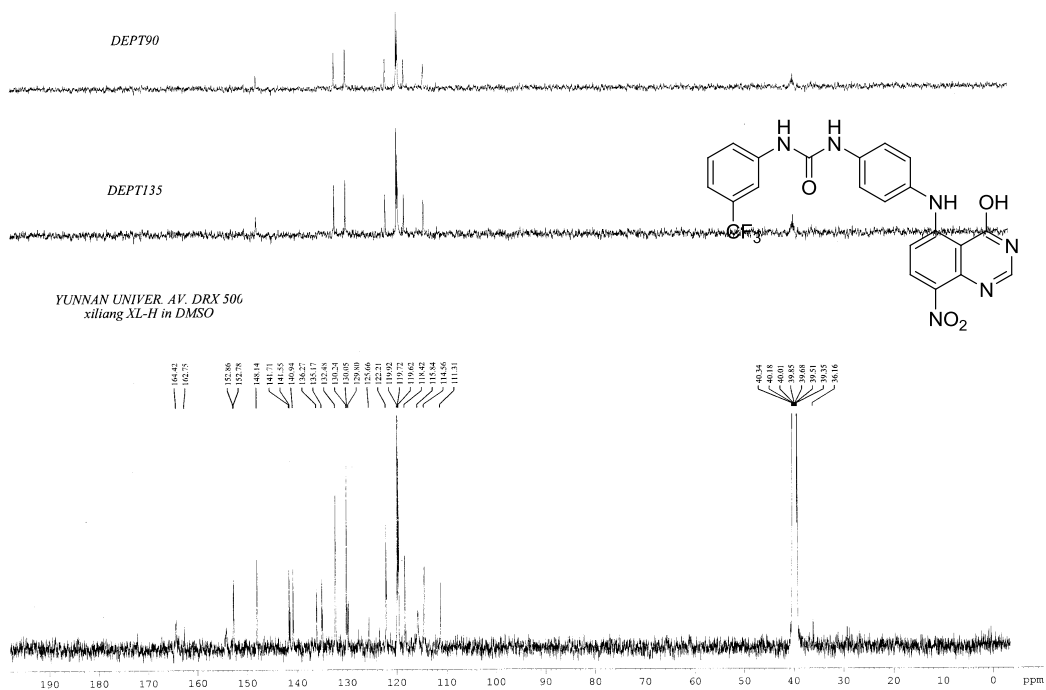

<sup>13</sup>C-NMR spectrum of 6d

### Supporting Information

For

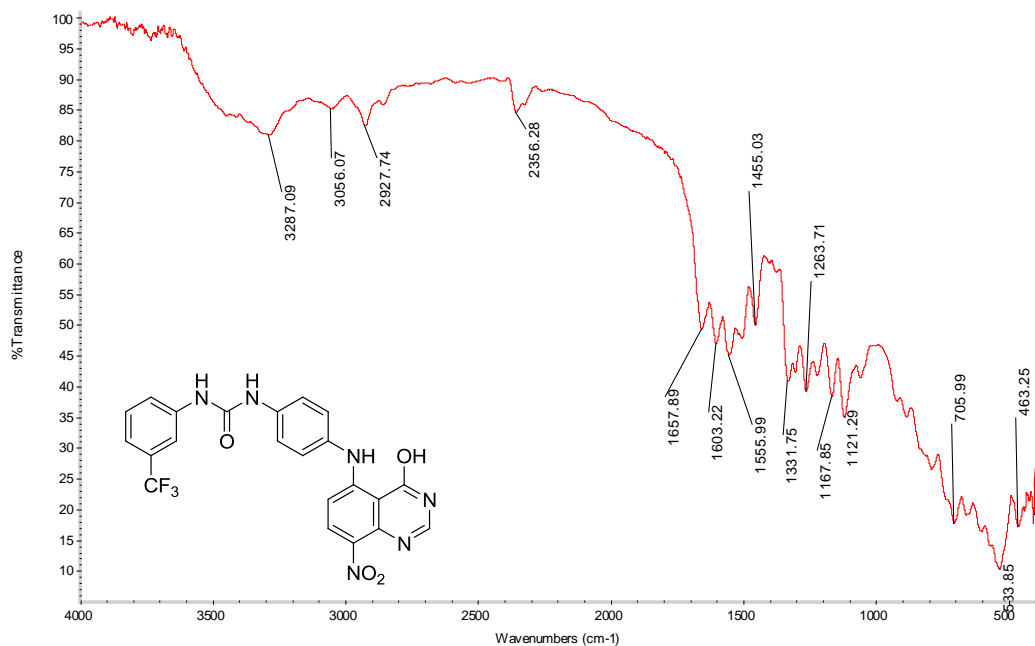

IR spectrum of 6d

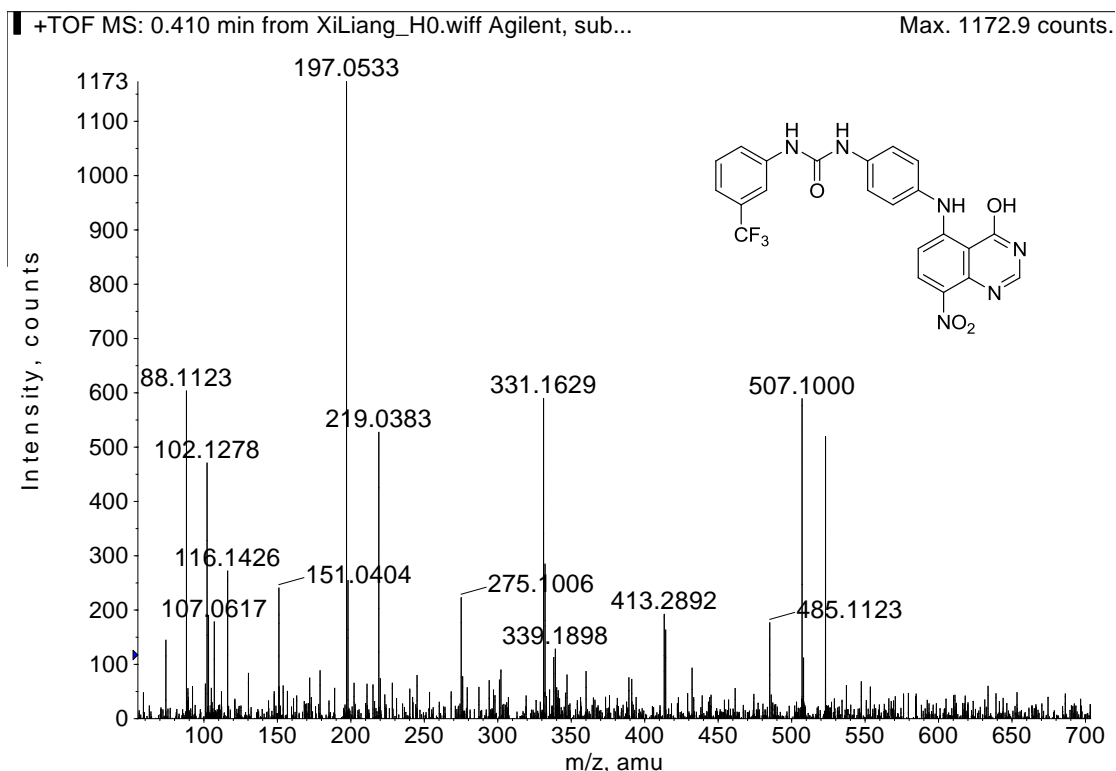

MS spectrum of 6d

For

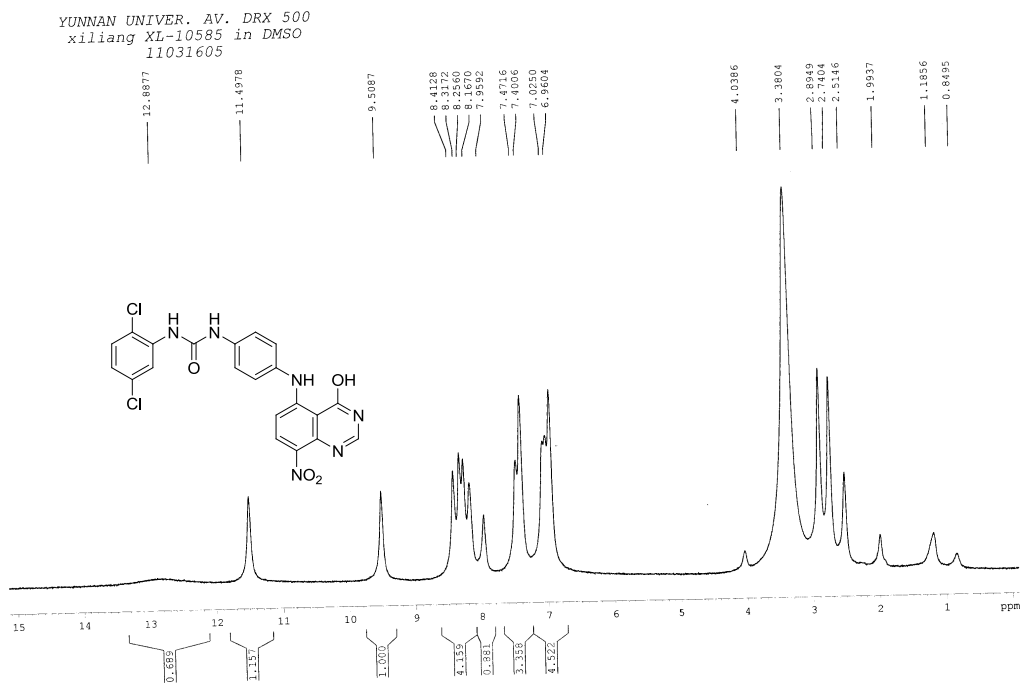

<sup>1</sup>H-NMR spectrum of 6e

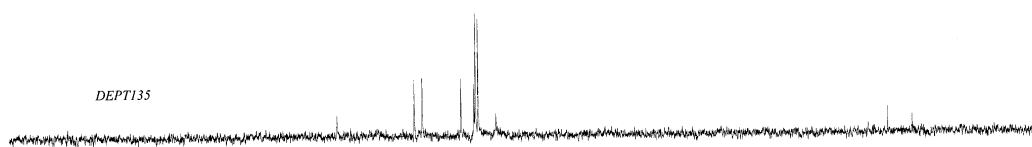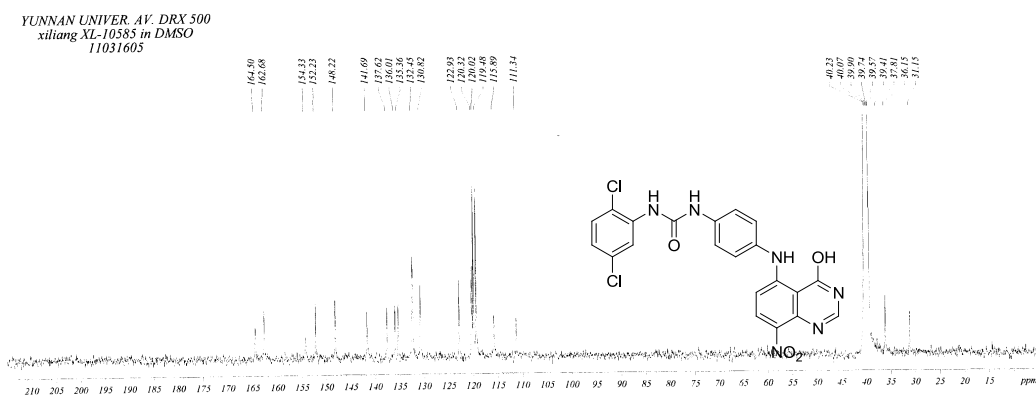

<sup>13</sup>C-NMR spectrum of 6e

### Supporting Information

For

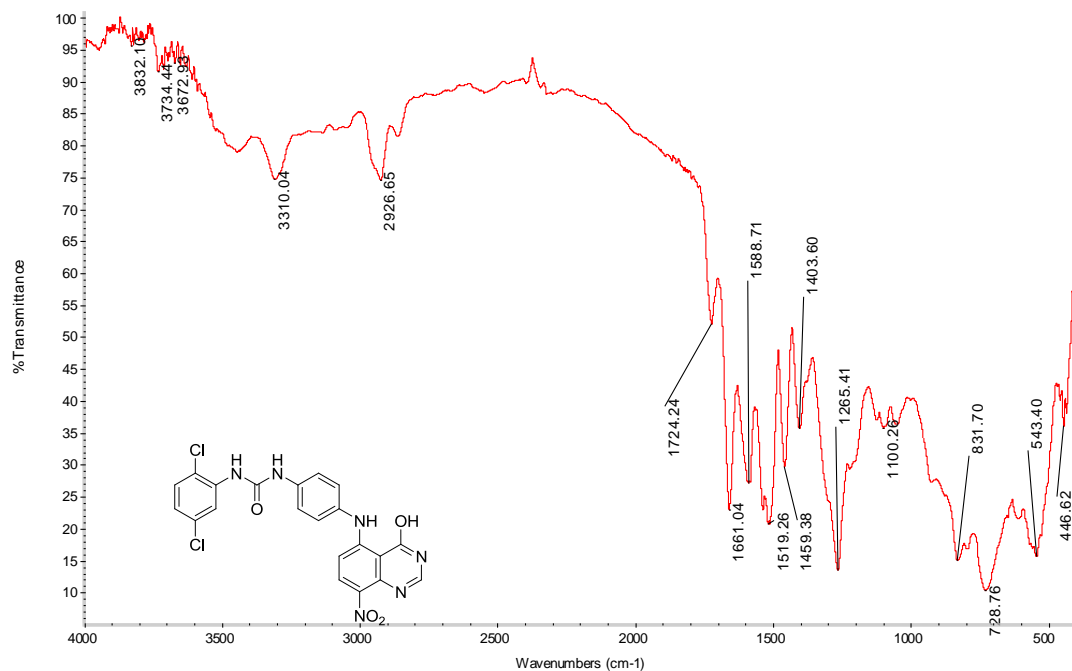

IR spectrum of 6e

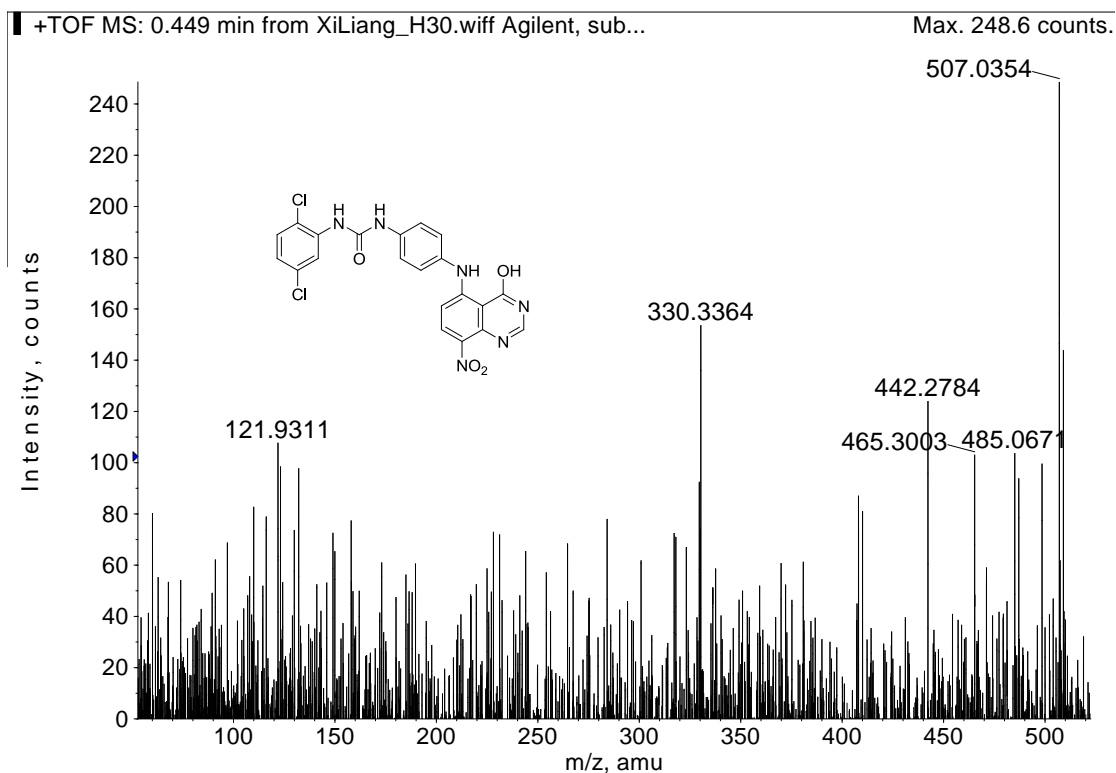

MS spectrum of 6e

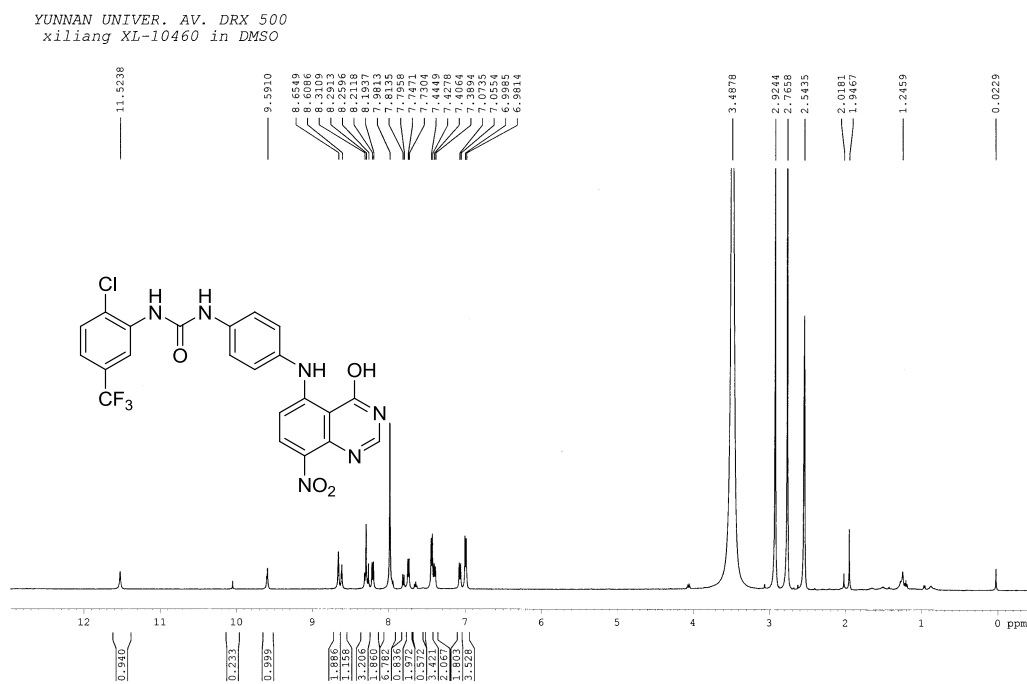

<sup>1</sup>H-NMR spectrum of **6f**

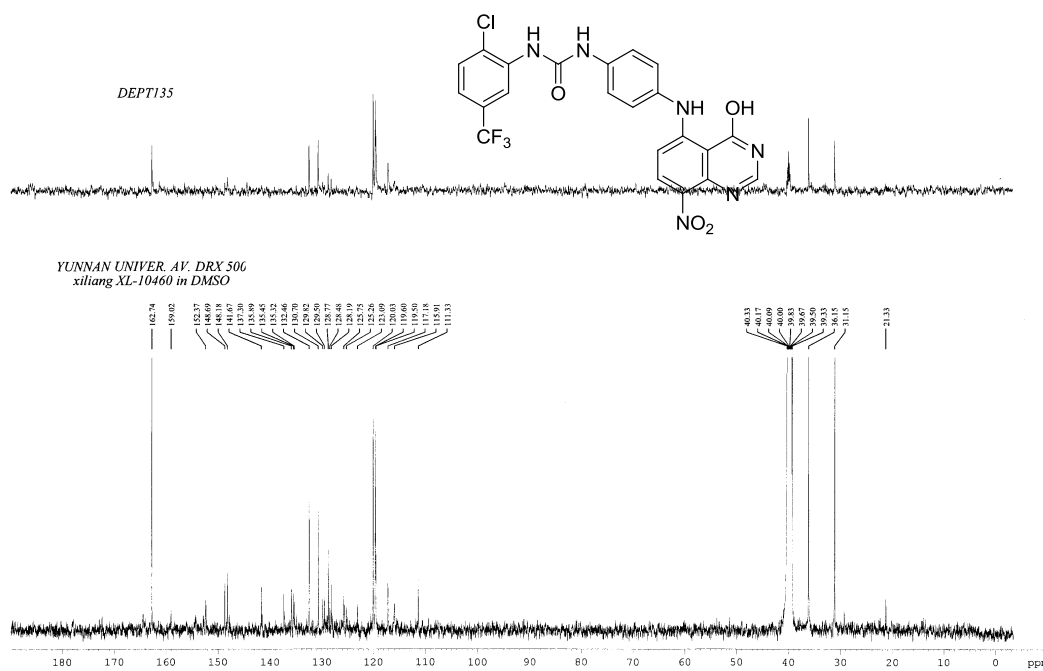

<sup>13</sup>C-NMR spectrum of **6f**



### Supporting Information

For

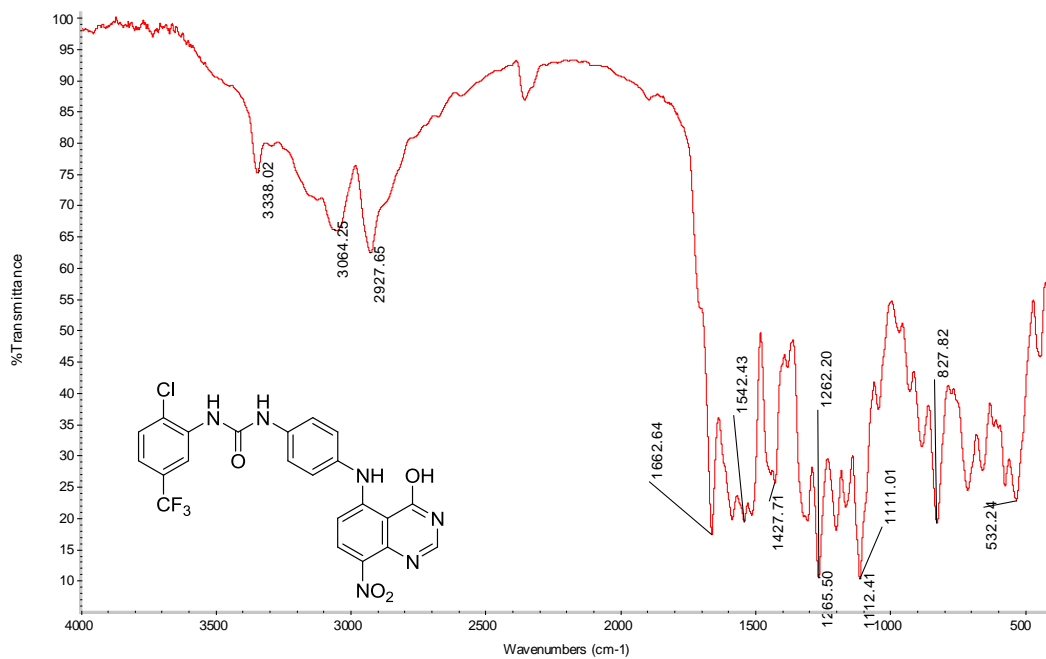

IR spectrum of 6f

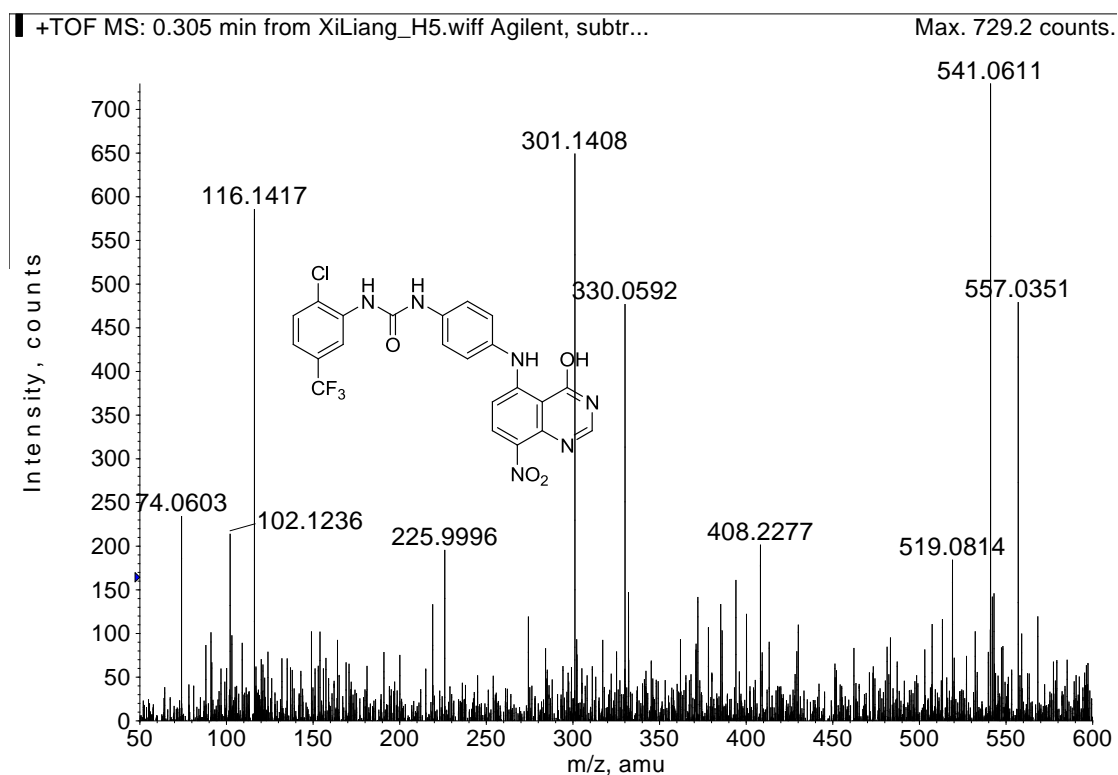

MS spectrum of 6f

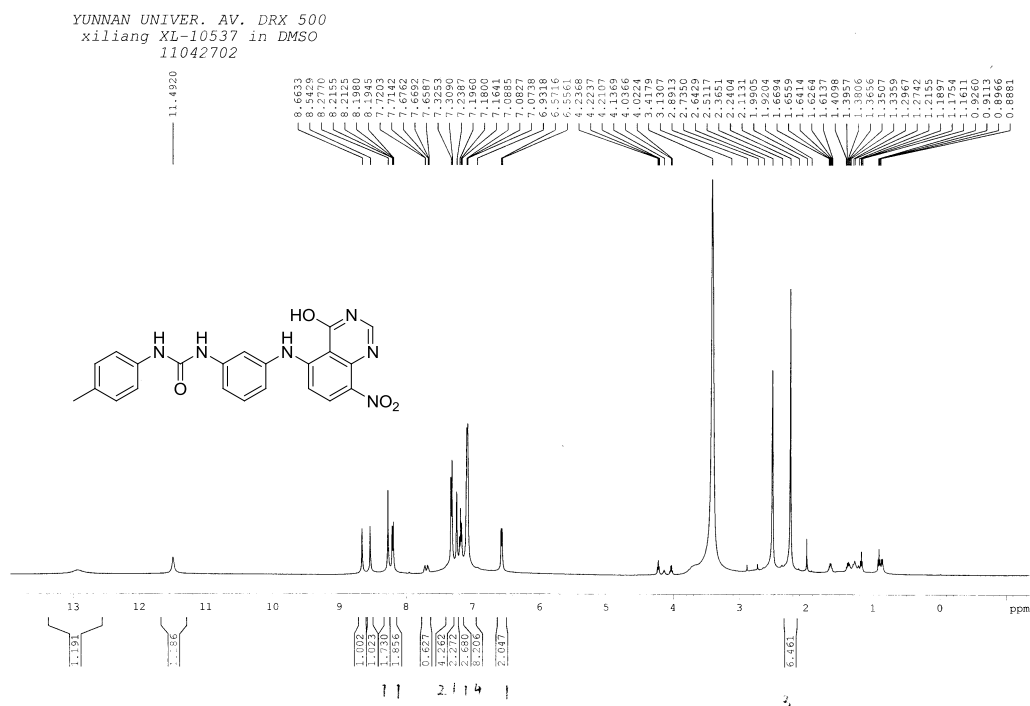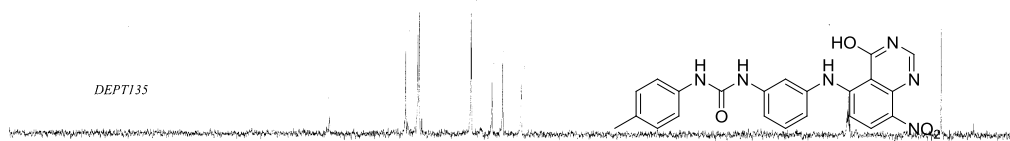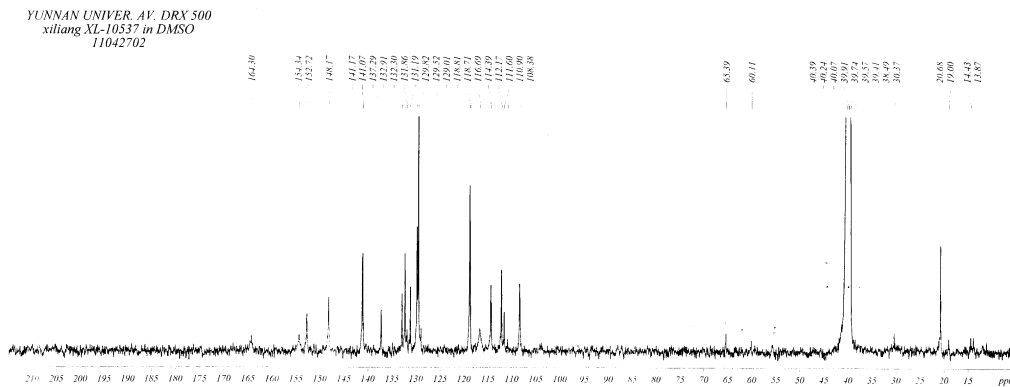

### Supporting Information

For

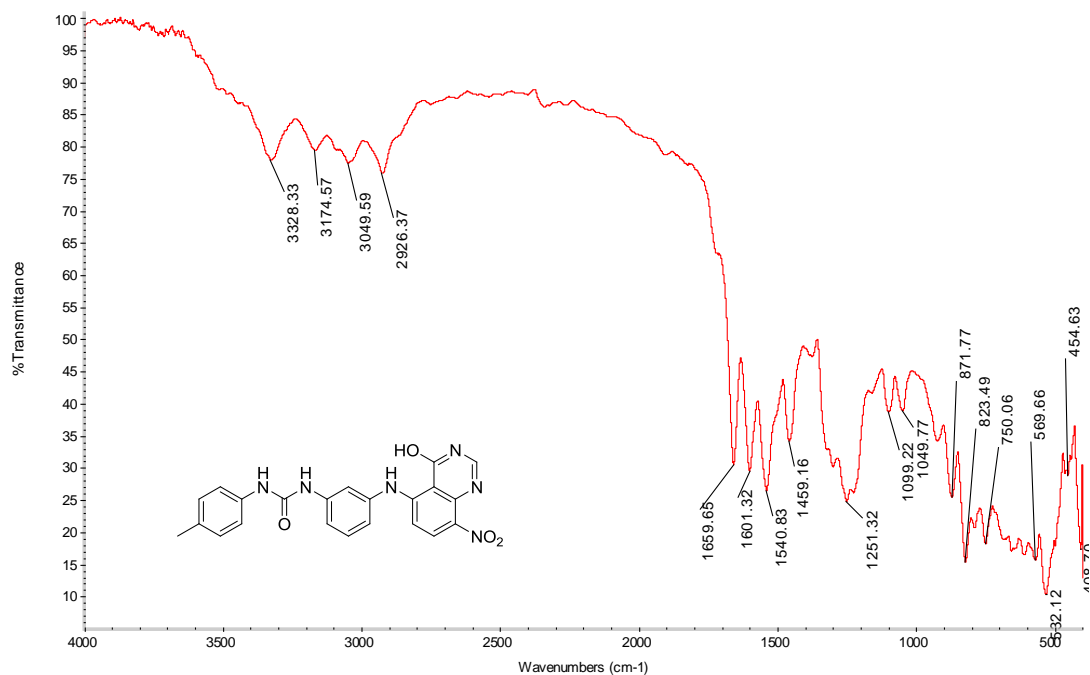

IR spectrum of 6g

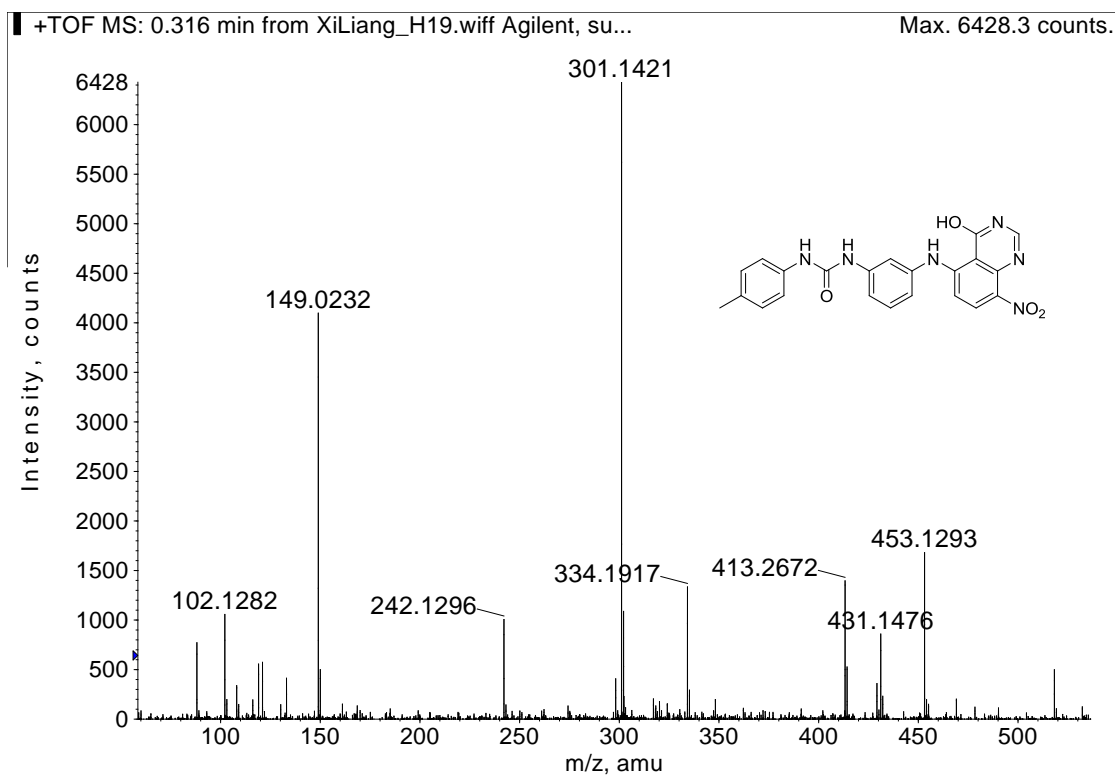

MS spectrum of 6g

For

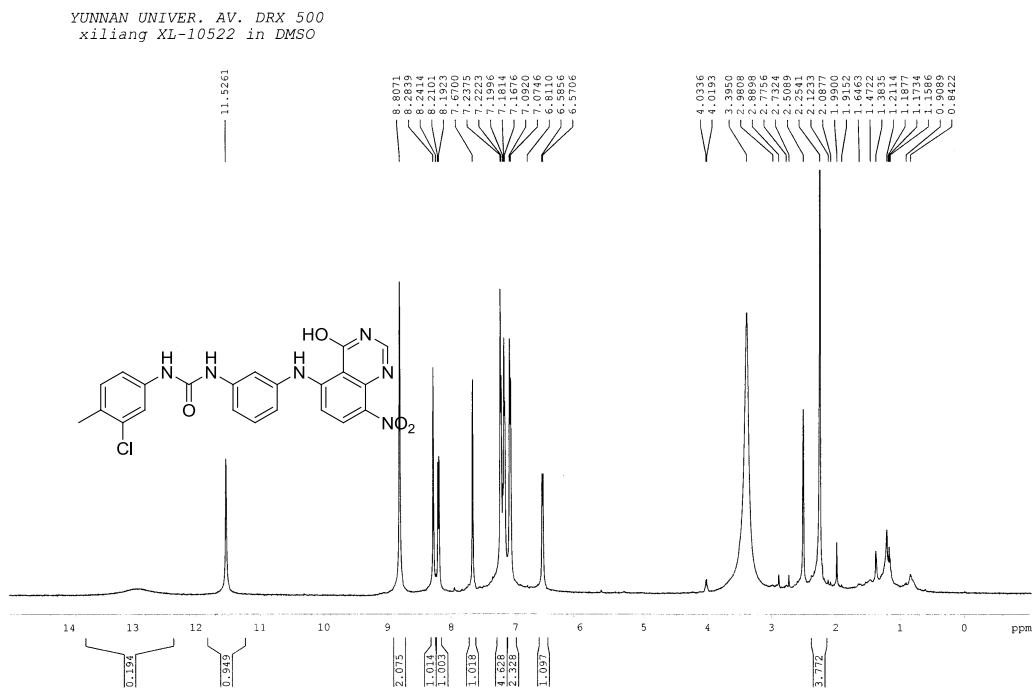

<sup>1</sup>H-NMR spectrum of 6h

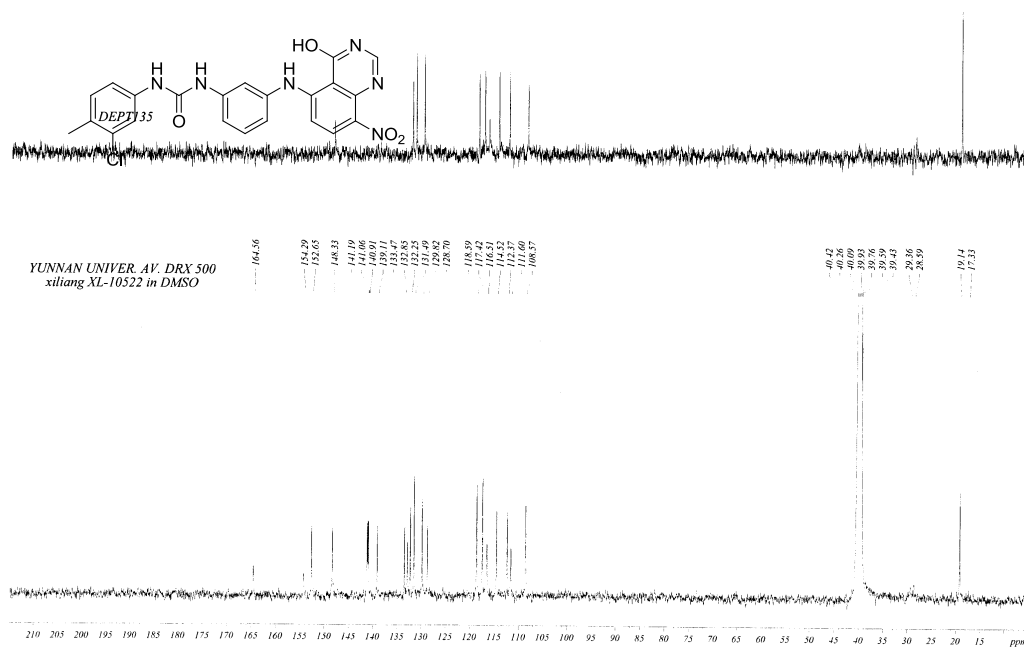

<sup>13</sup>C-NMR spectrum of 6h

### Supporting Information

For

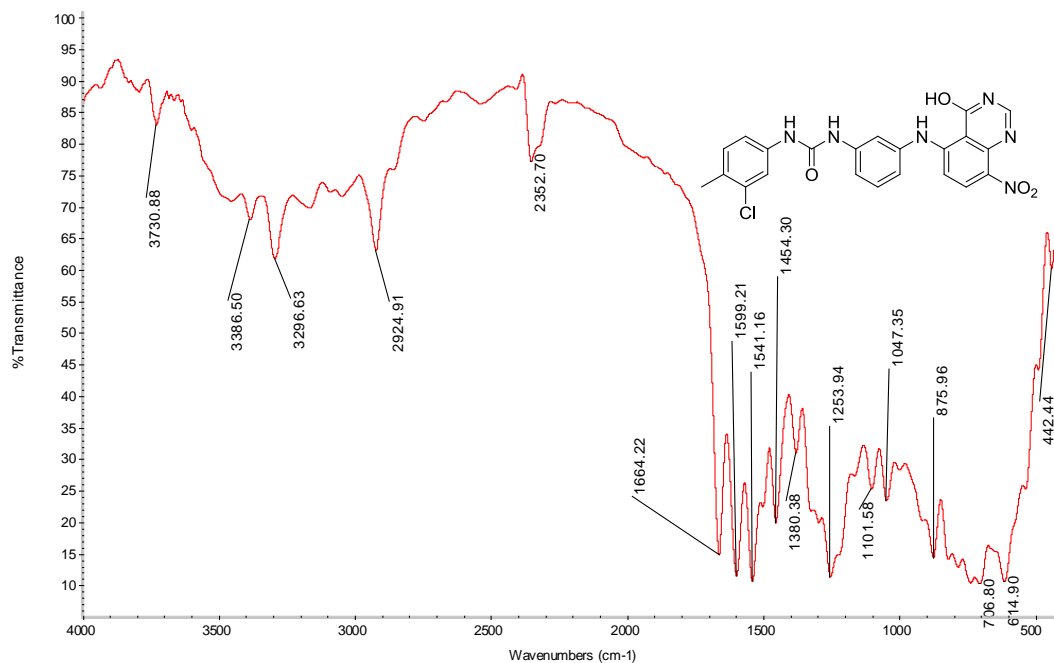

**IR spectrum of 6h**

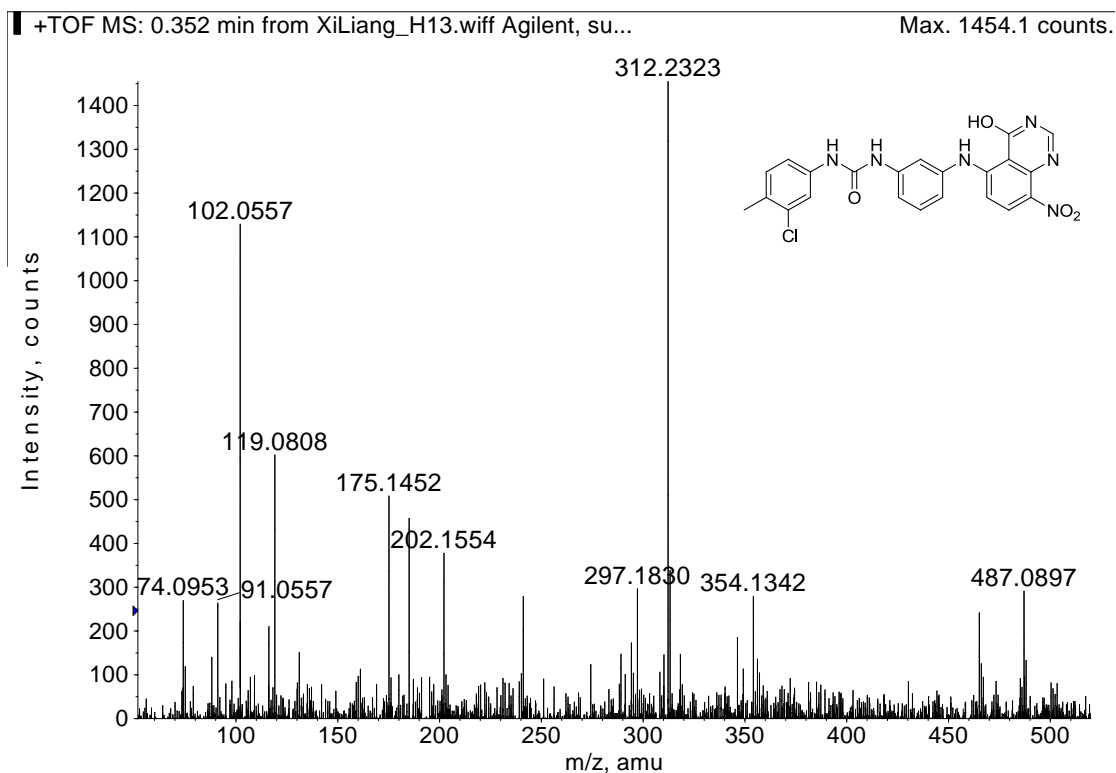

**MS spectrum of 6h**

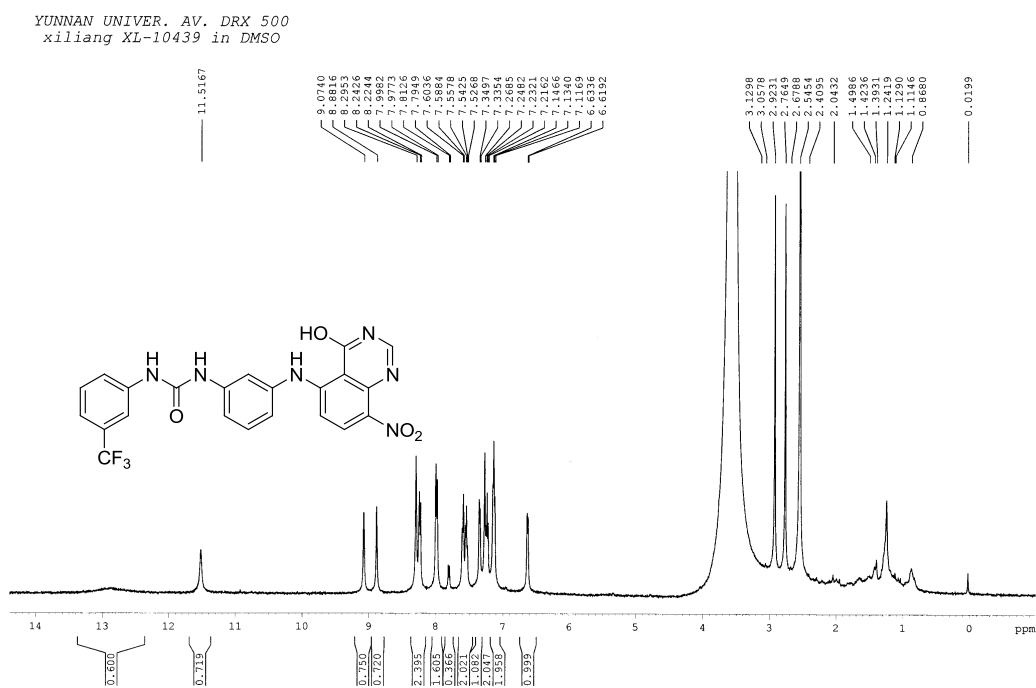

<sup>1</sup>H-NMR spectrum of 6i

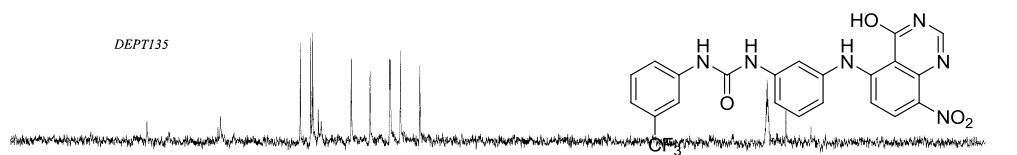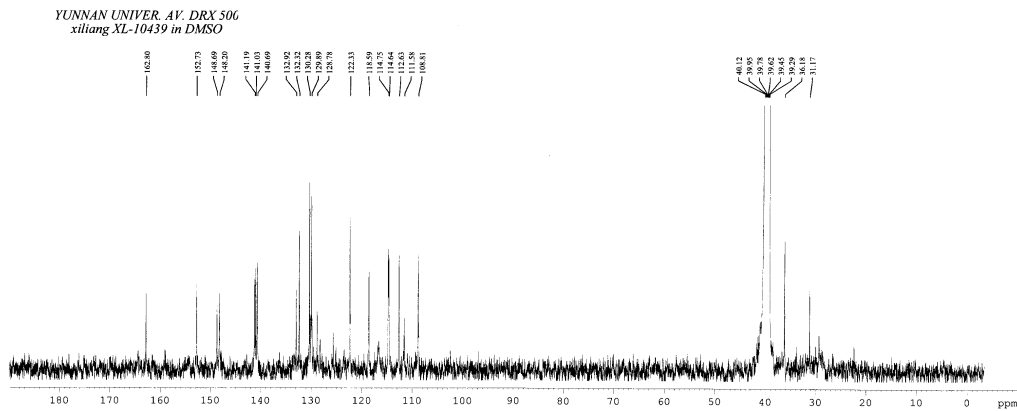

<sup>13</sup>C-NMR spectrum of 6i

### Supporting Information

For

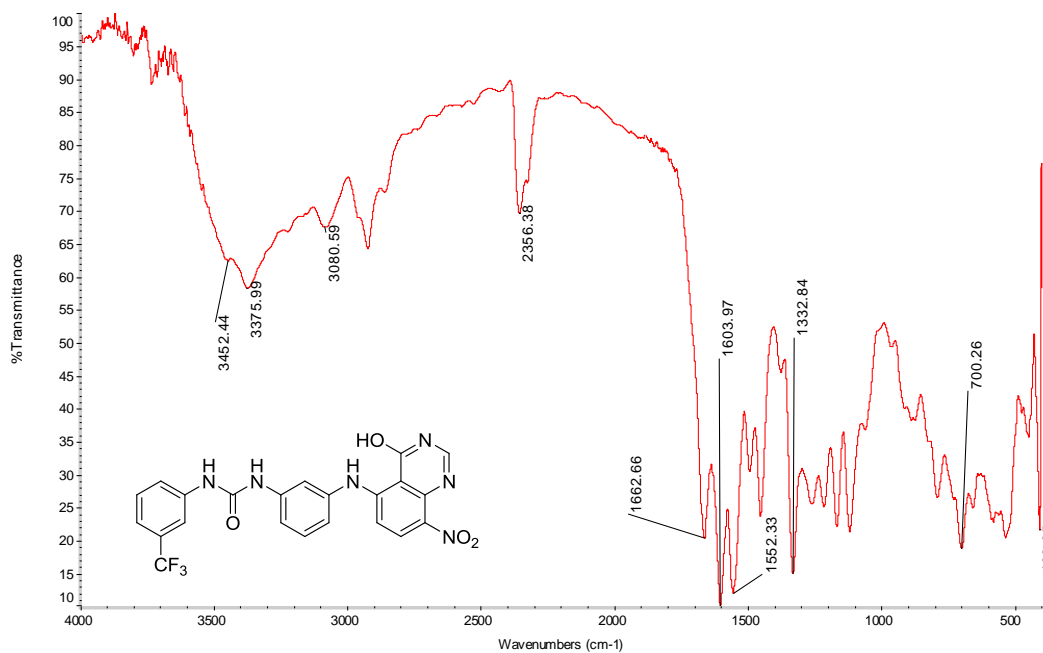

### IR spectrum of 6i

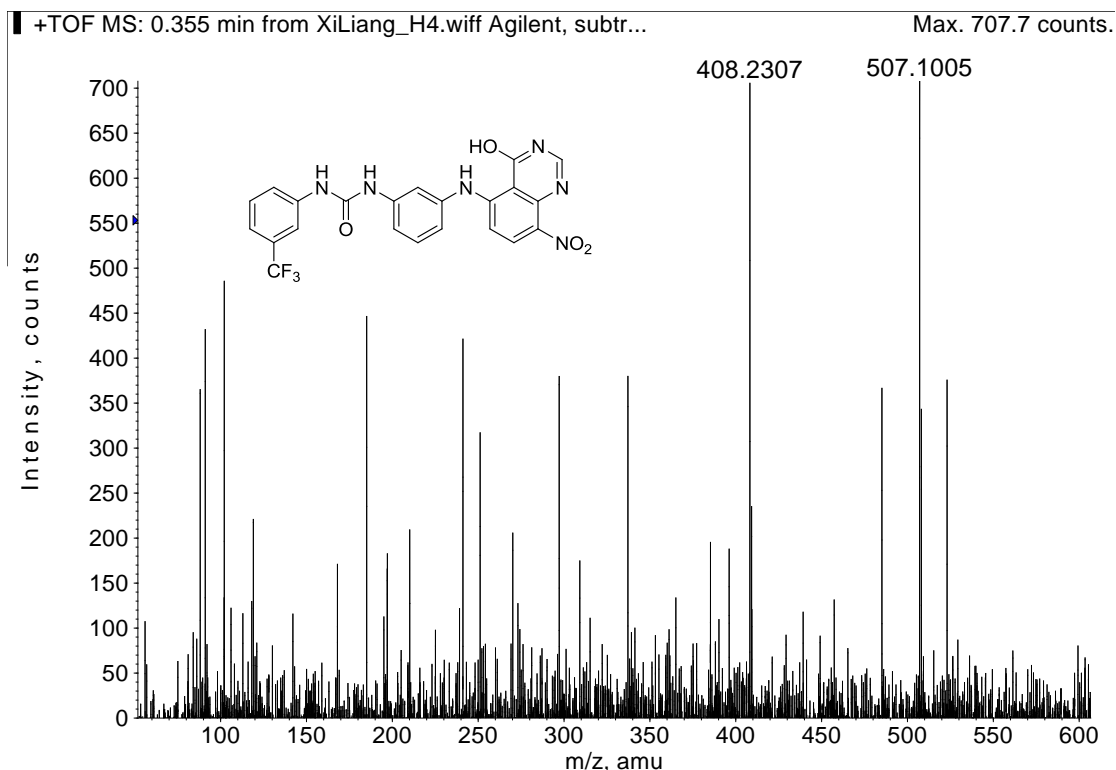

### MS spectrum of 6i

For

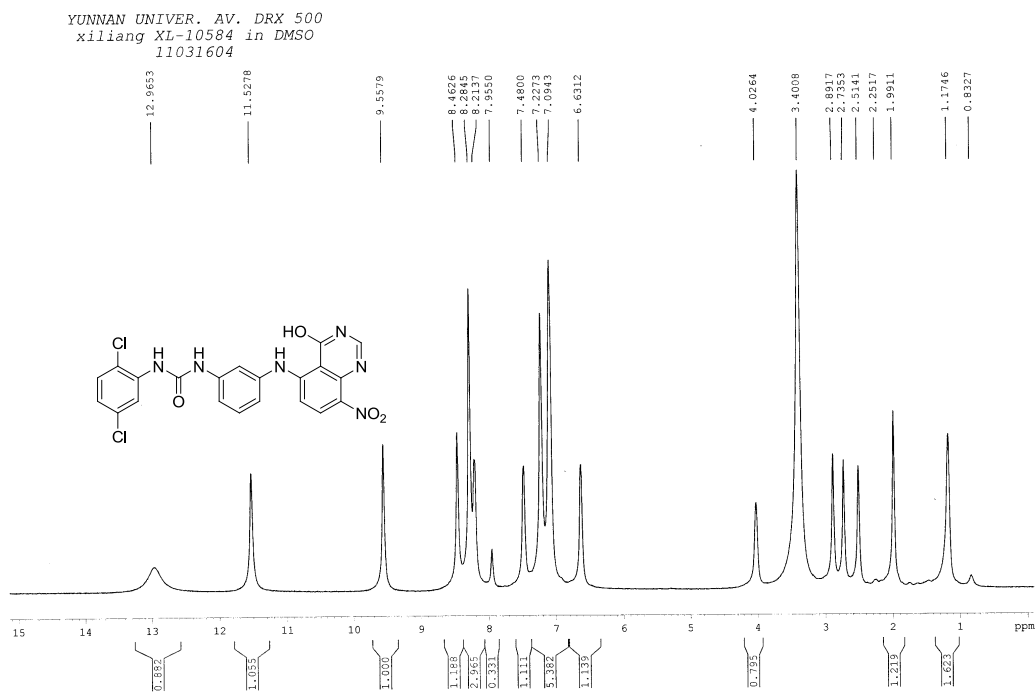

<sup>1</sup>H-NMR spectrum of 6j

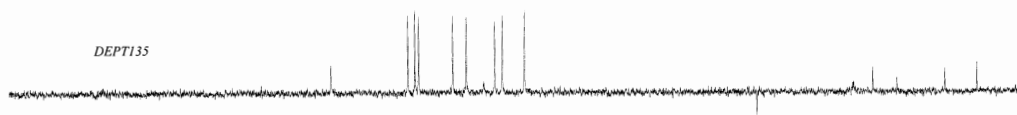

YUNNAN UNIVER. AV. DRX 500  
 xiliang XL-10584 in DMSO  
 11031604

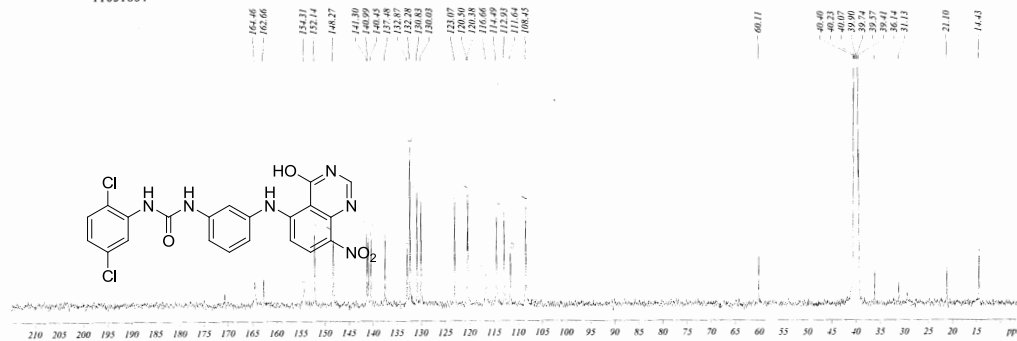

<sup>13</sup>C-NMR spectrum of 6j



### Supporting Information

For

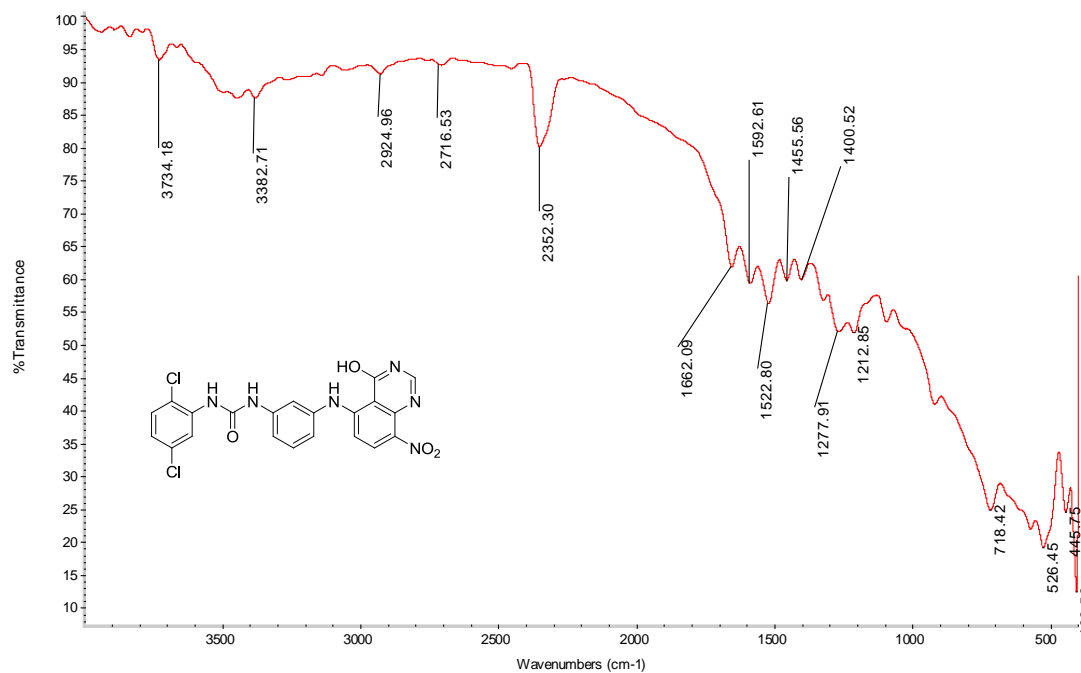

IR spectrum of 6j

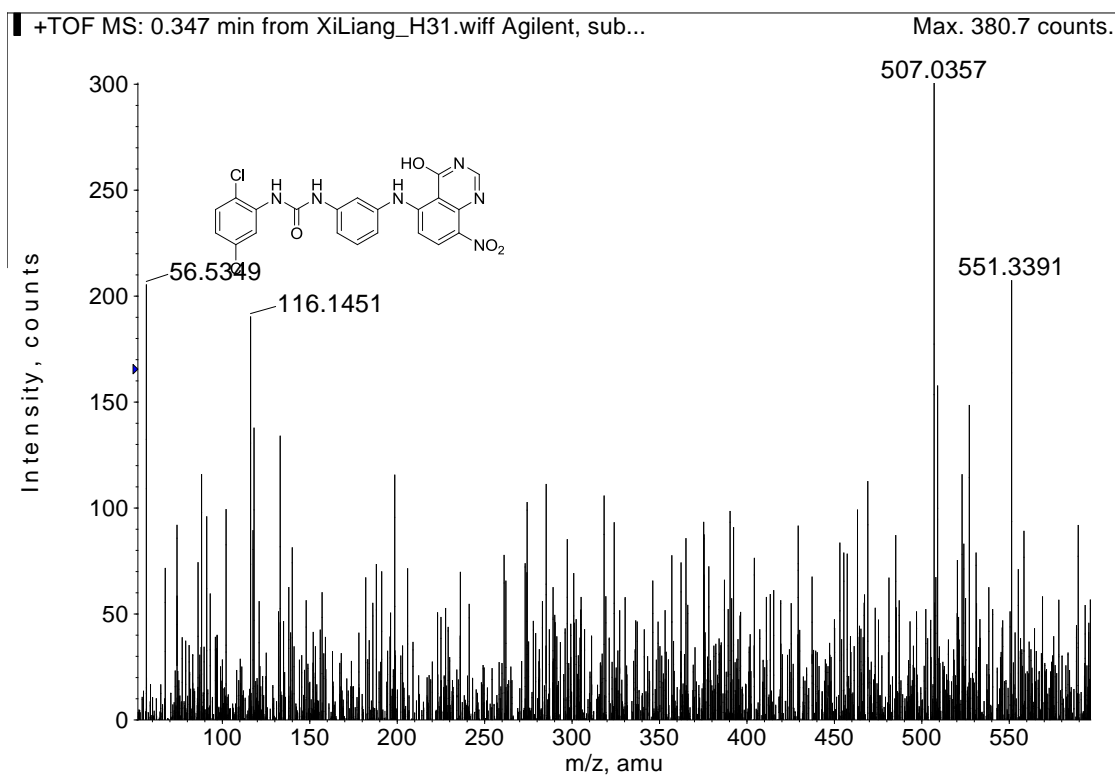

MS spectrum of 6j

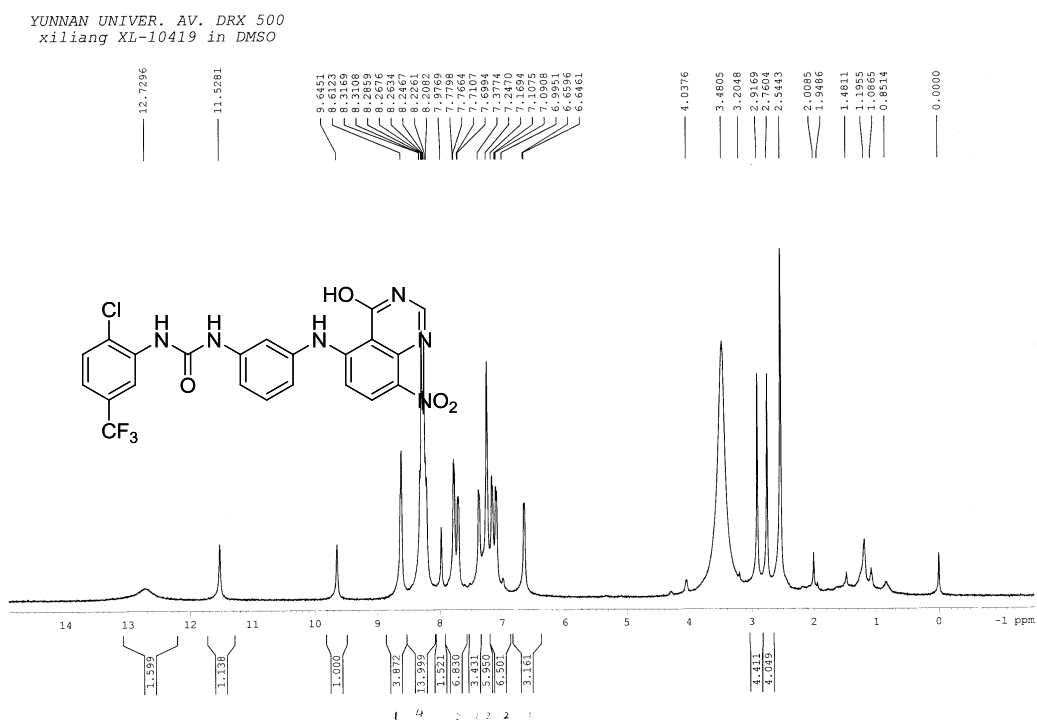

<sup>1</sup>H-NMR spectrum of 6k

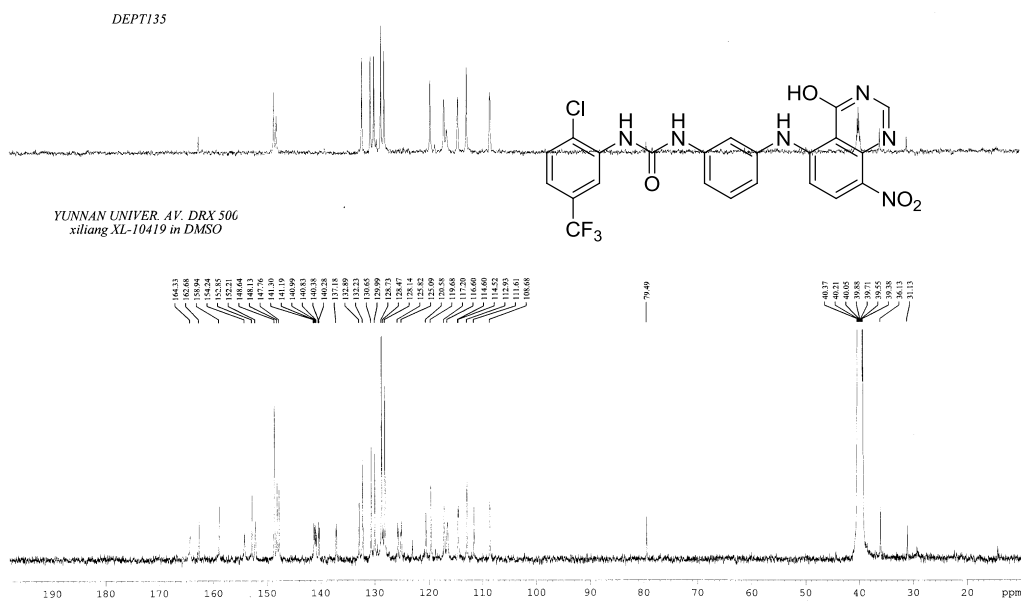

<sup>13</sup>C-NMR spectrum of 6k

### Supporting Information

For

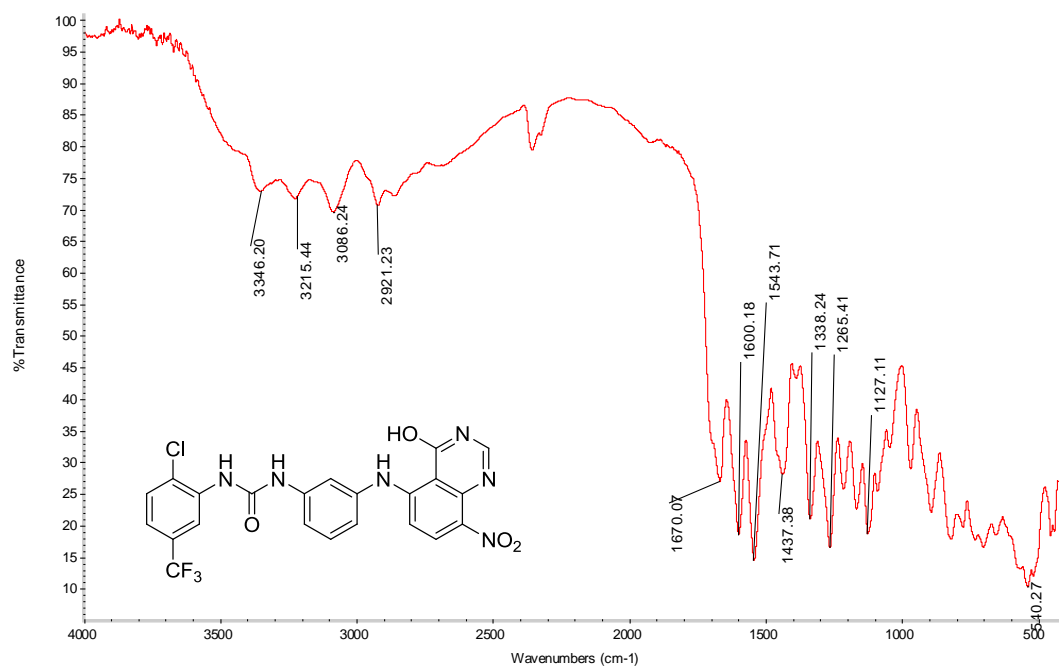

IR spectrum of 6k

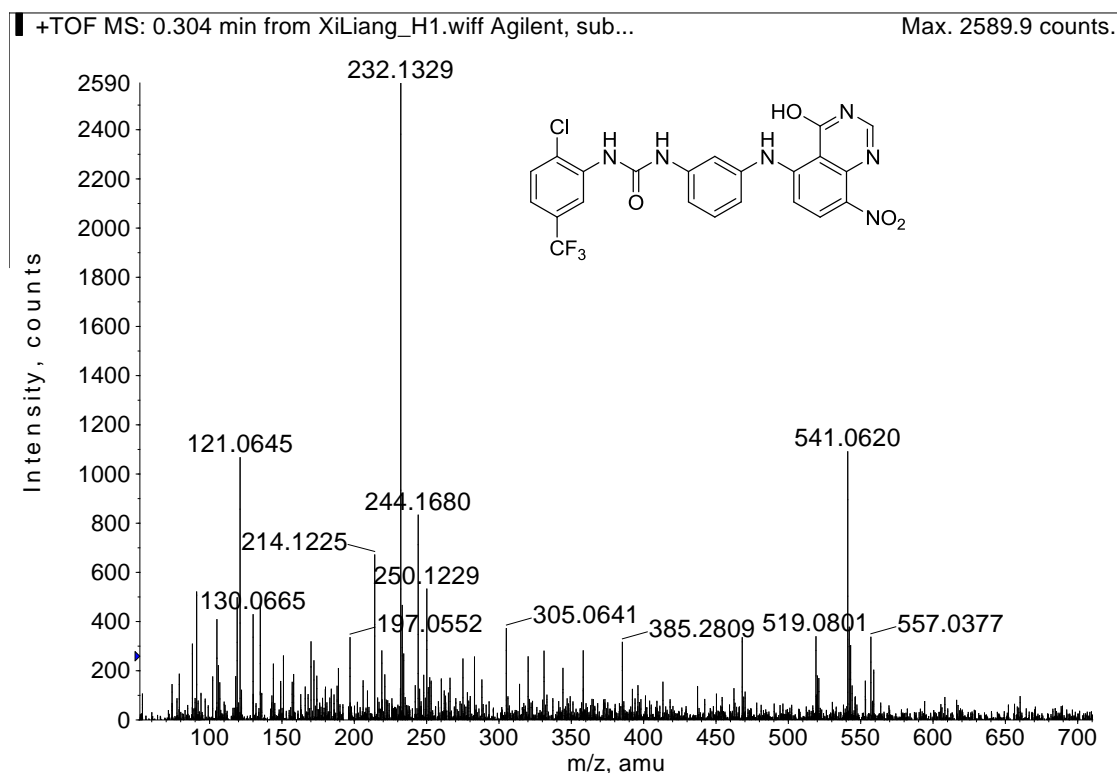

MS spectrum of 6k

For

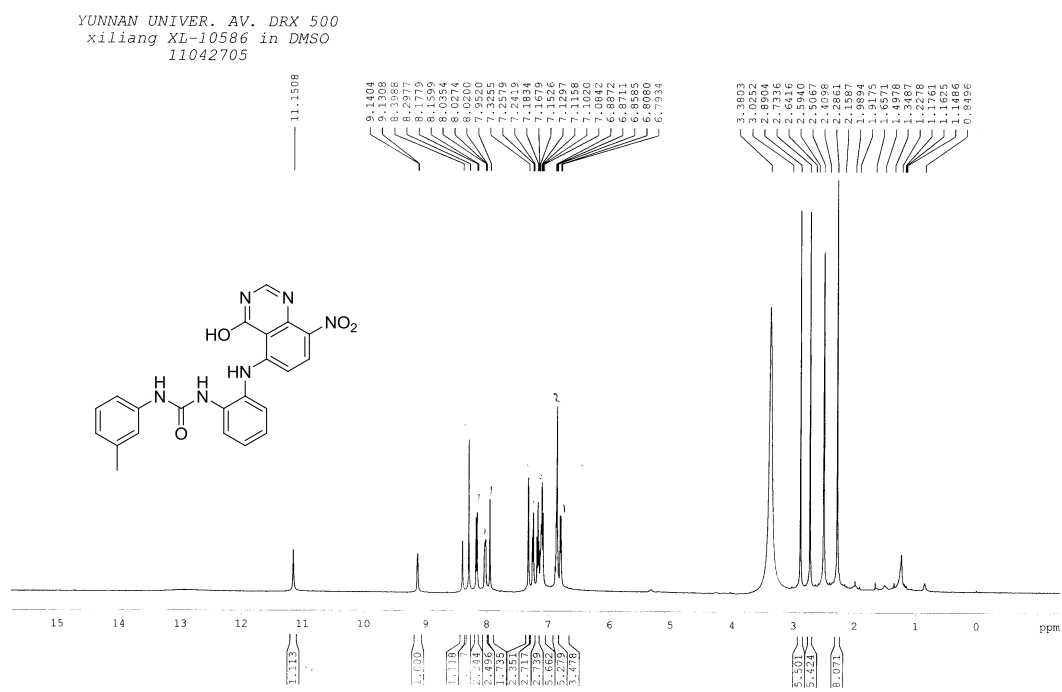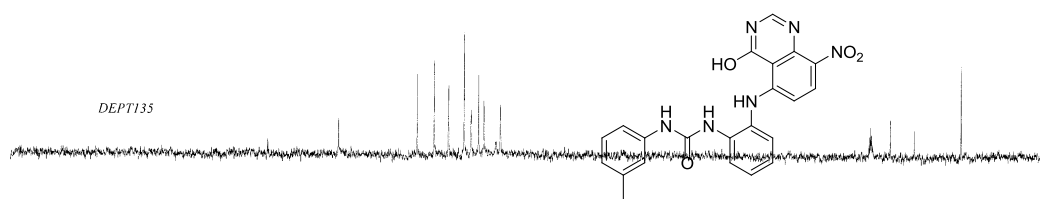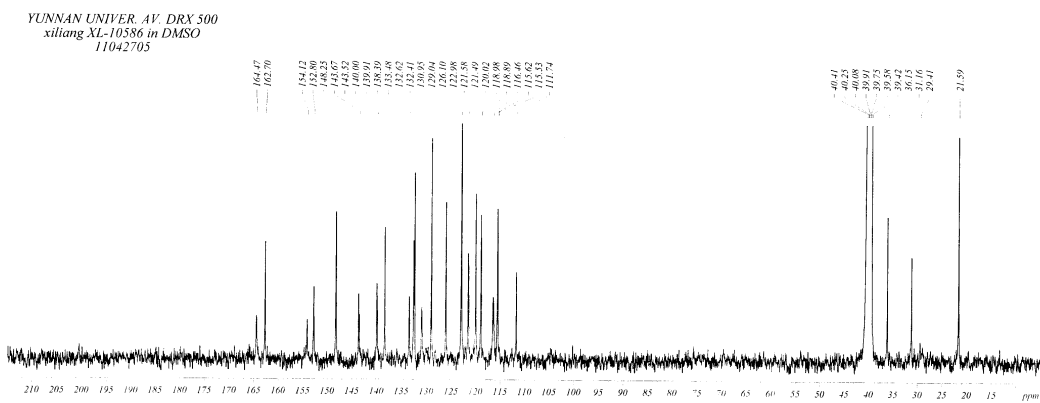

### Supporting Information

For

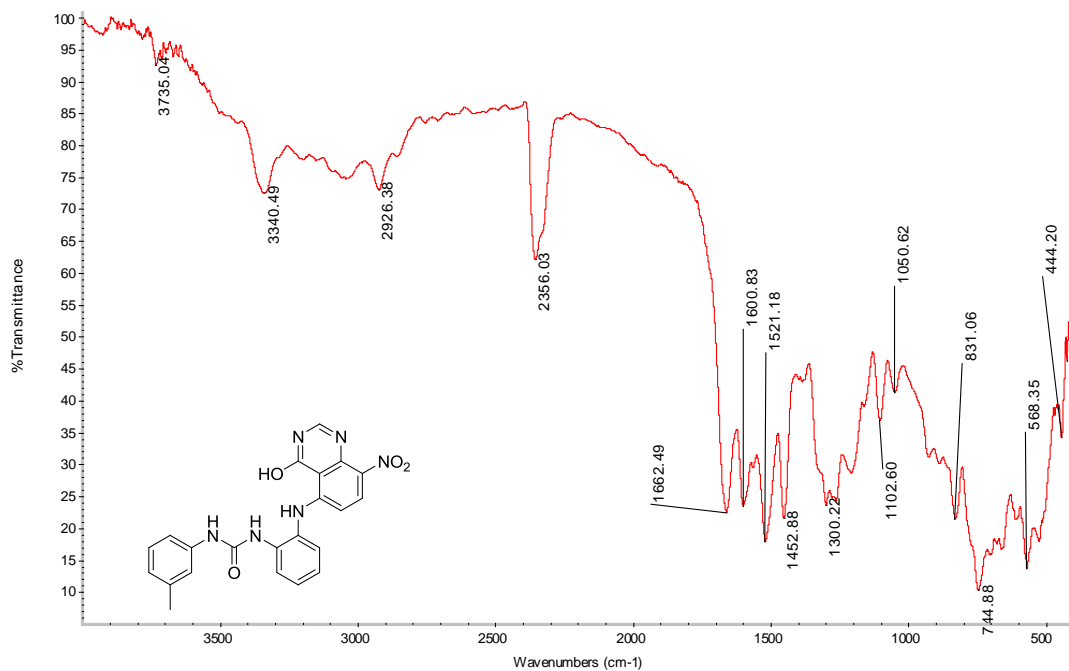

IR spectrum of 6l

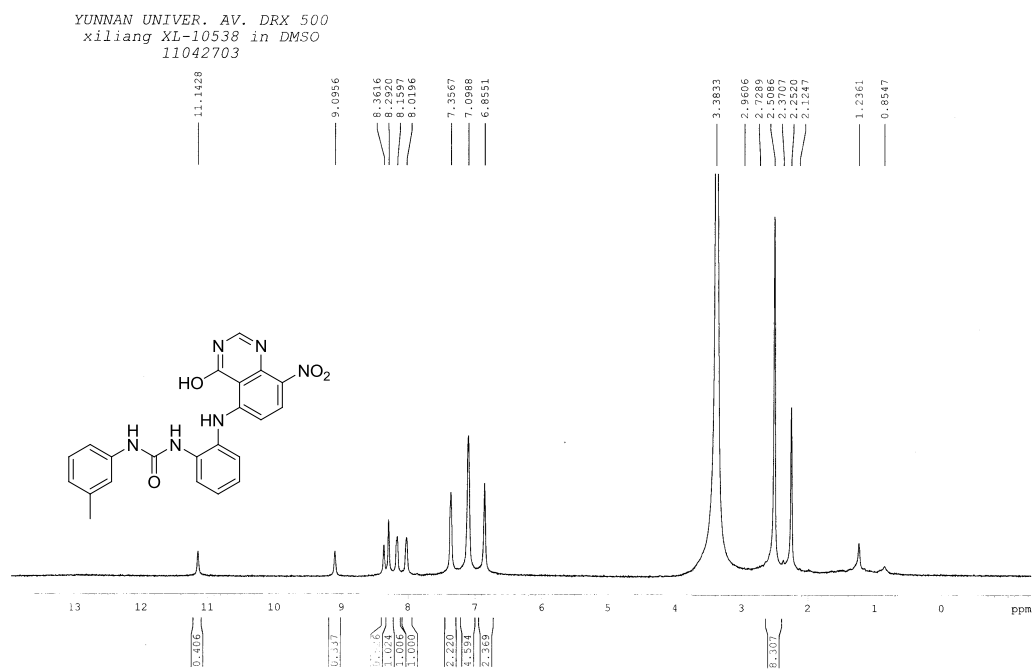

<sup>1</sup>H-NMR spectrum of 6m

For

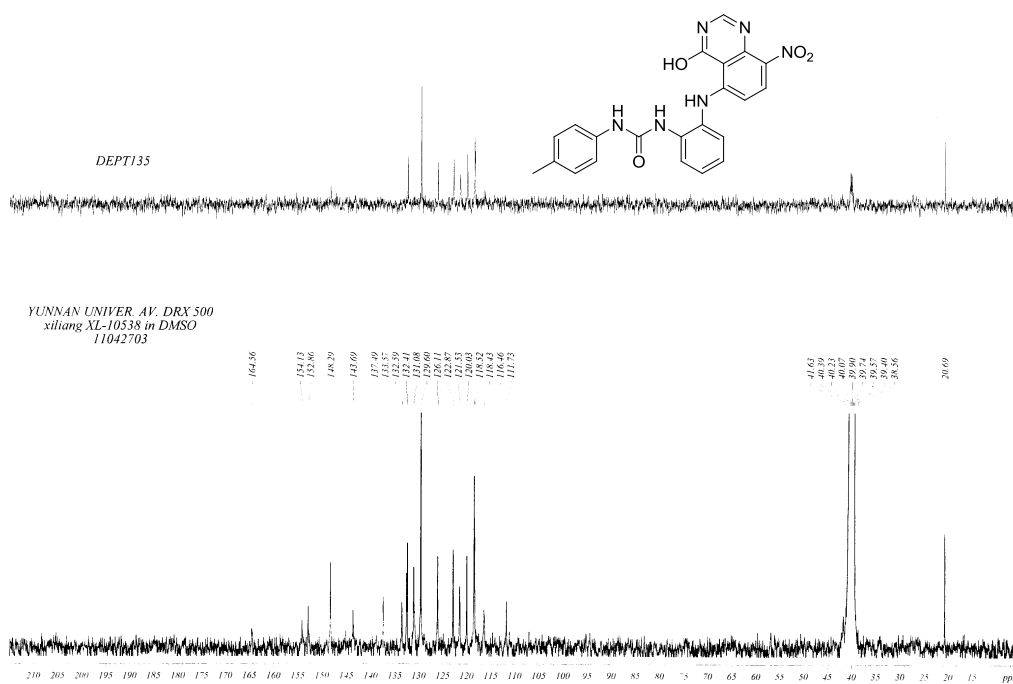

<sup>13</sup>C-NMR spectrum of 6m

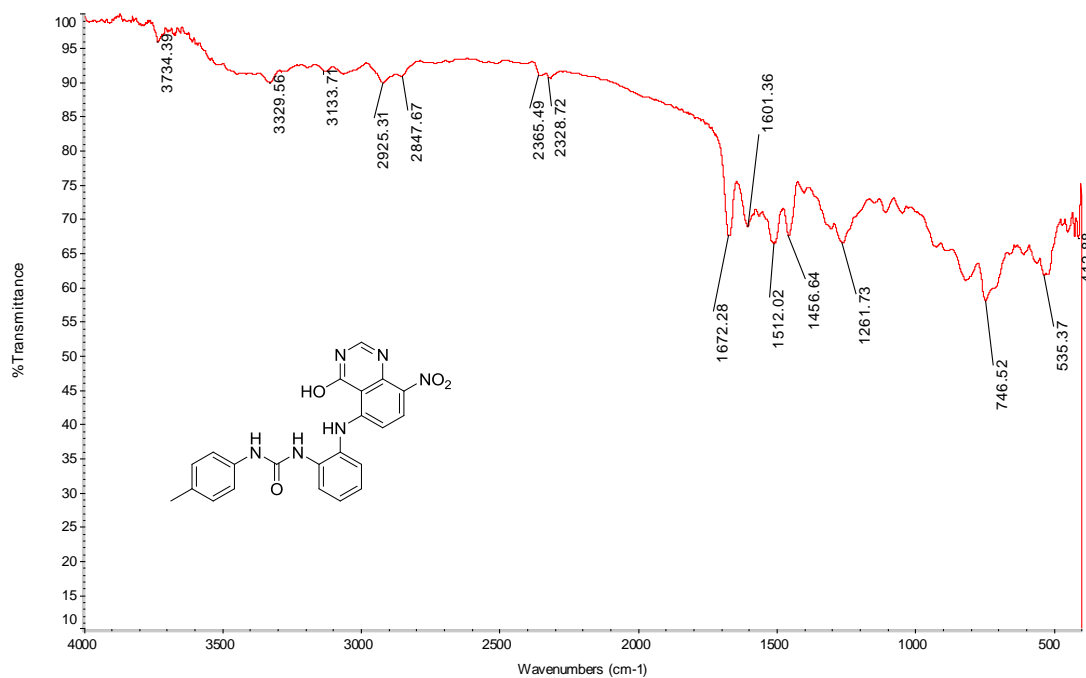

IR spectrum of 6m

### Supporting Information

For

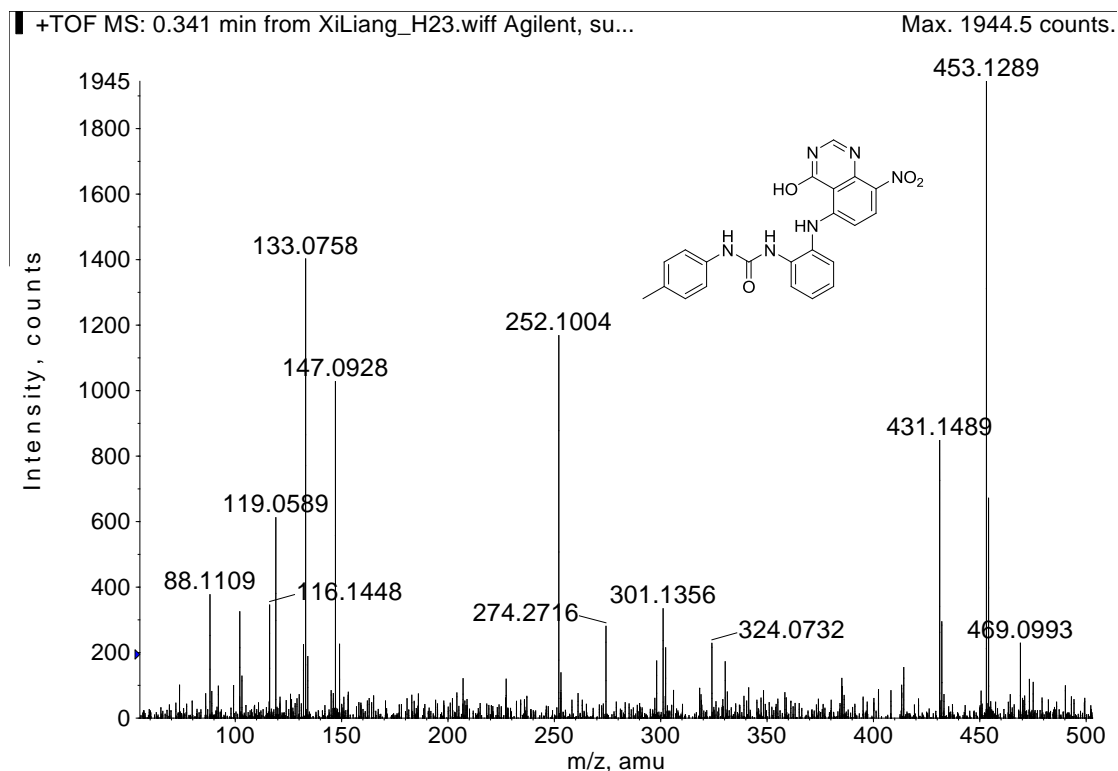

### MS spectrum of 6m

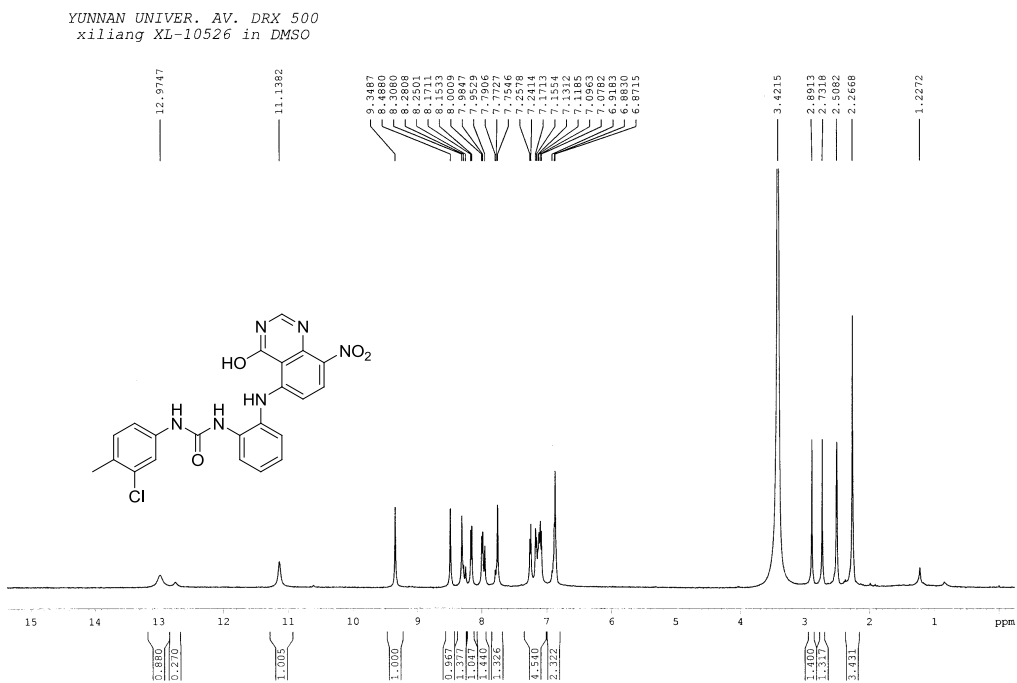

### <sup>1</sup>H-NMR spectrum of 6n

For

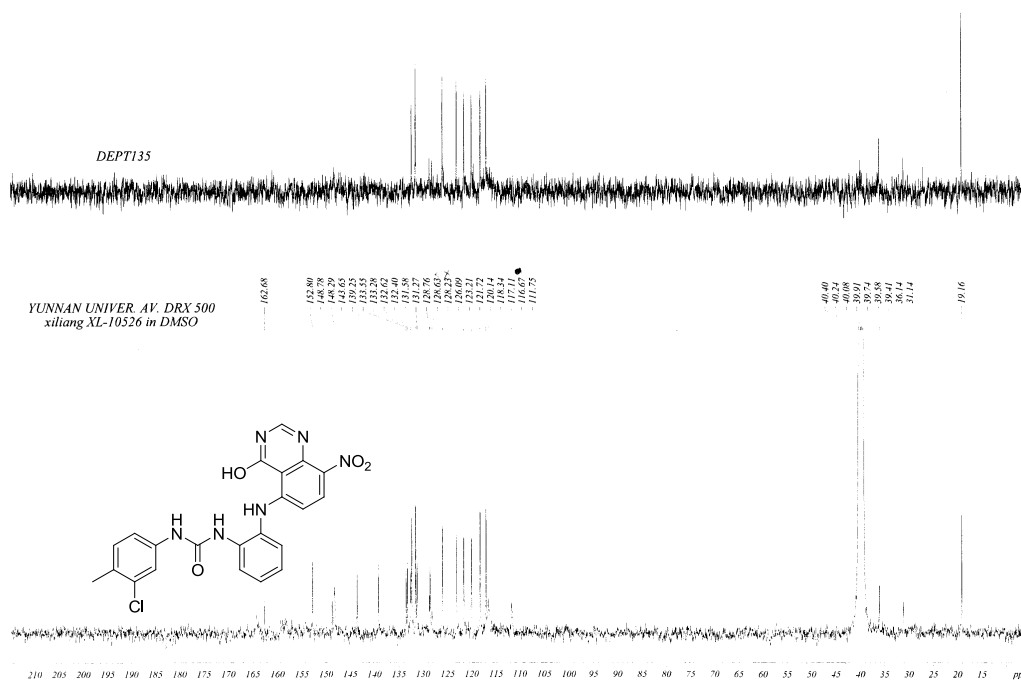

<sup>13</sup>C-NMR spectrum of 6n

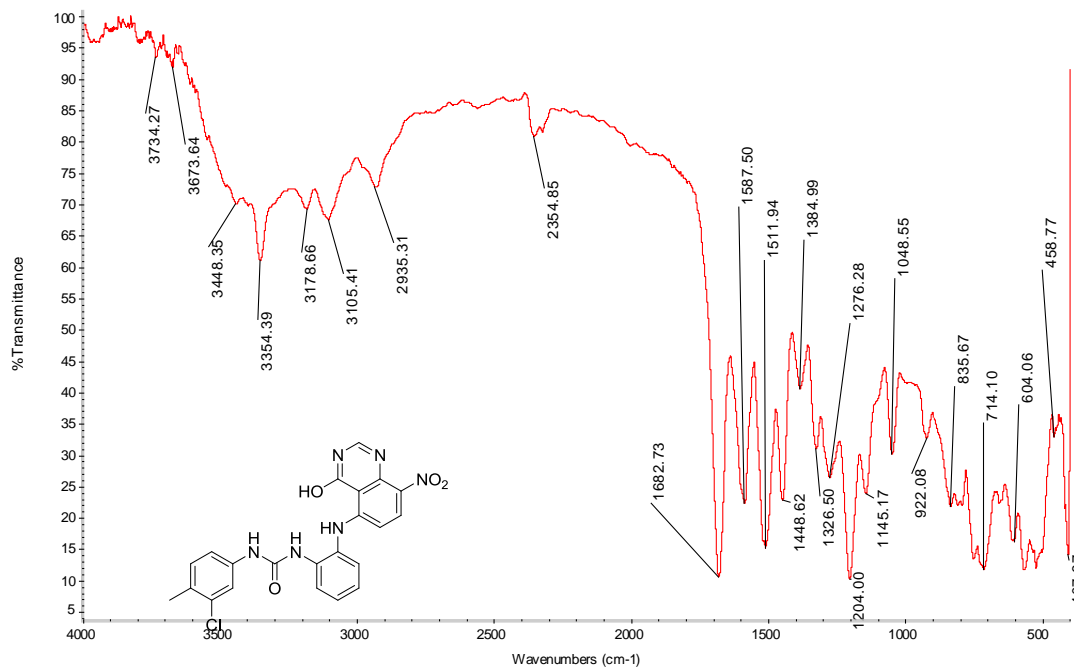

IR spectrum of 6n



### Supporting Information

For

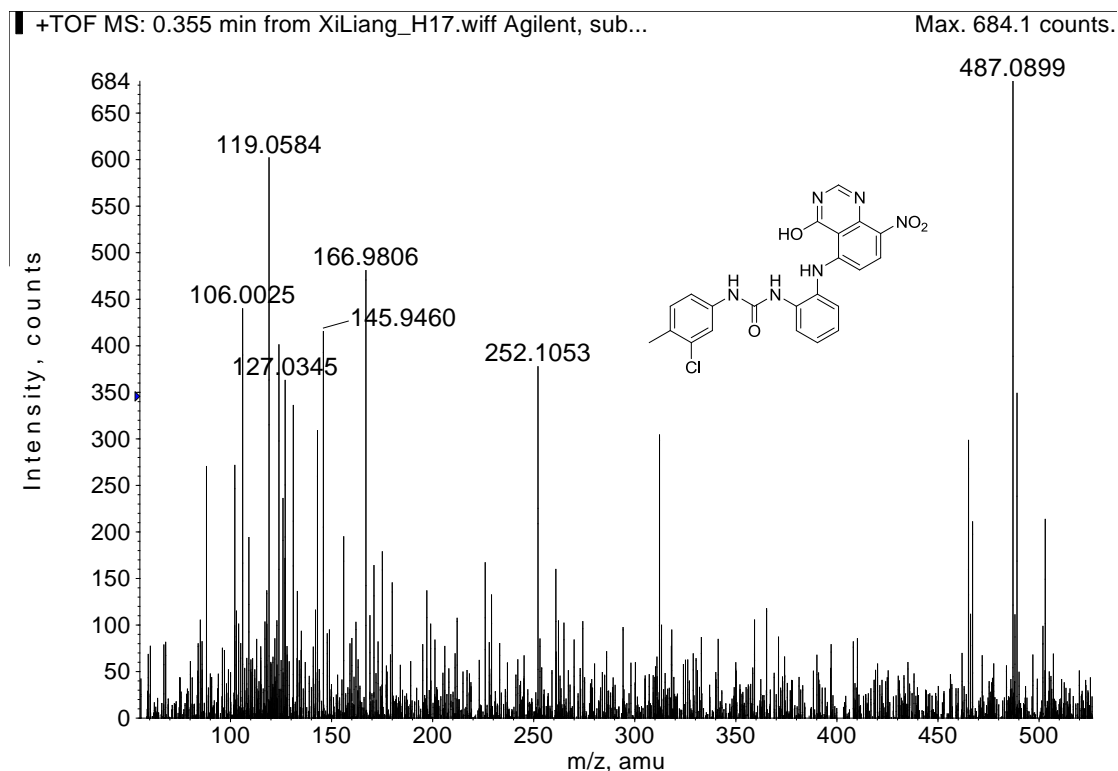

### MS spectrum of 6n

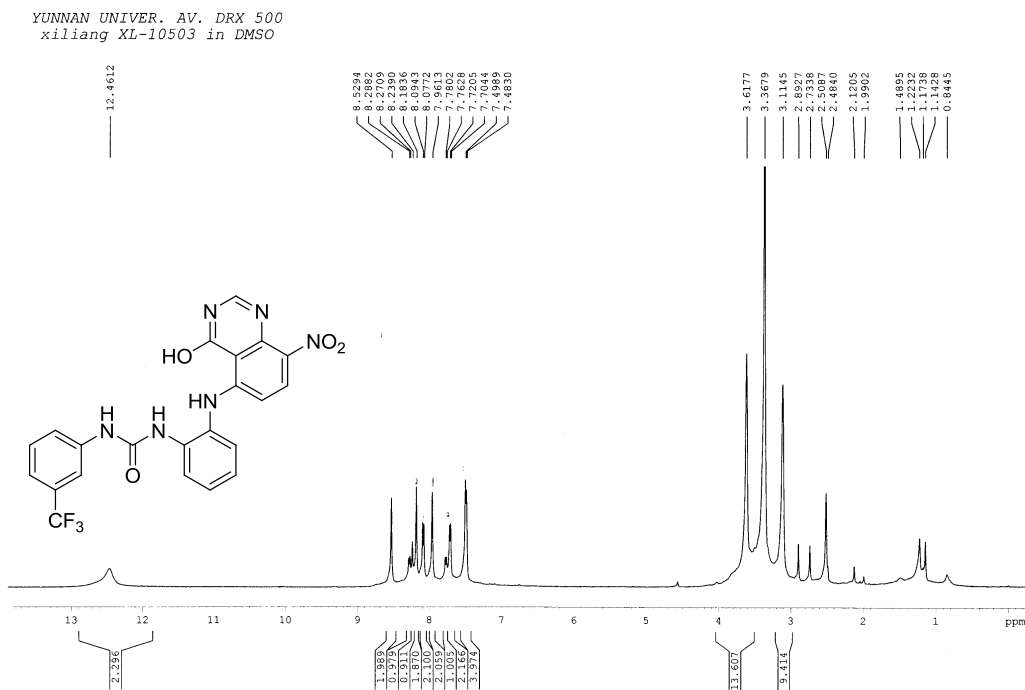

### <sup>1</sup>H-NMR spectrum of 6o

For

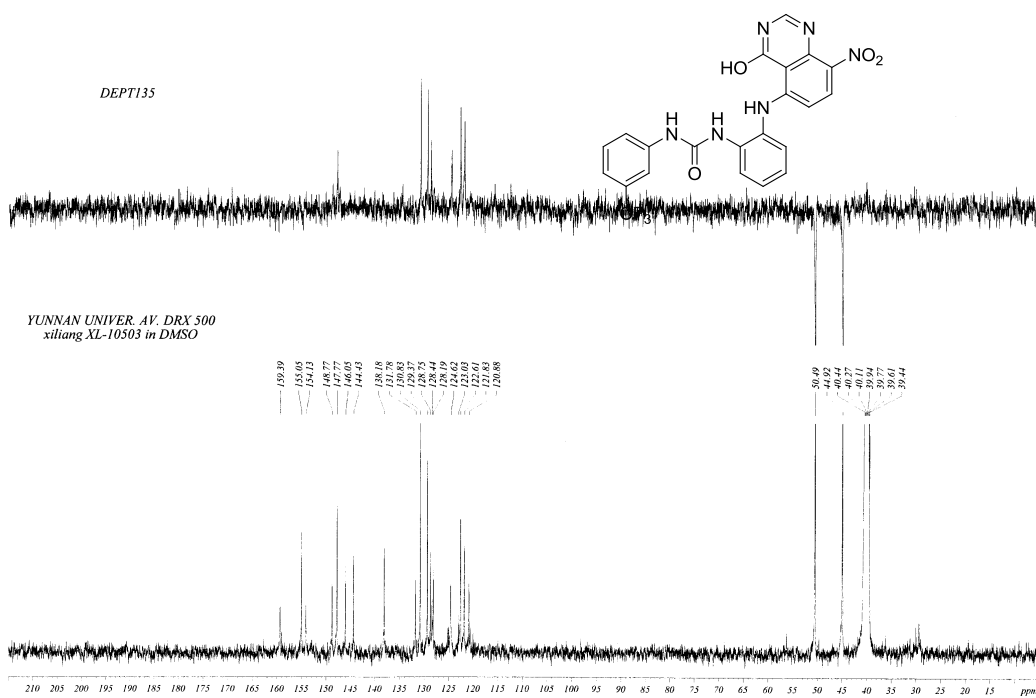

<sup>13</sup>C-NMR spectrum of 60

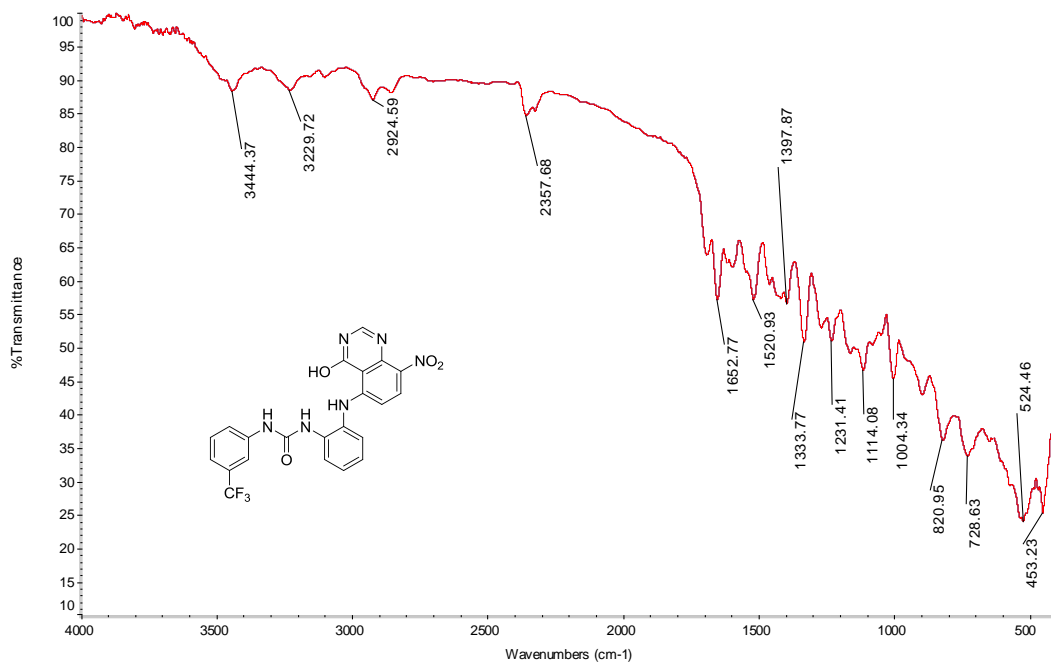

IR spectrum of 60

### Supporting Information

For

YUNNAN UNIVER. AV. DRX 500  
xiliang XL-105101 in DMSO  
11042707

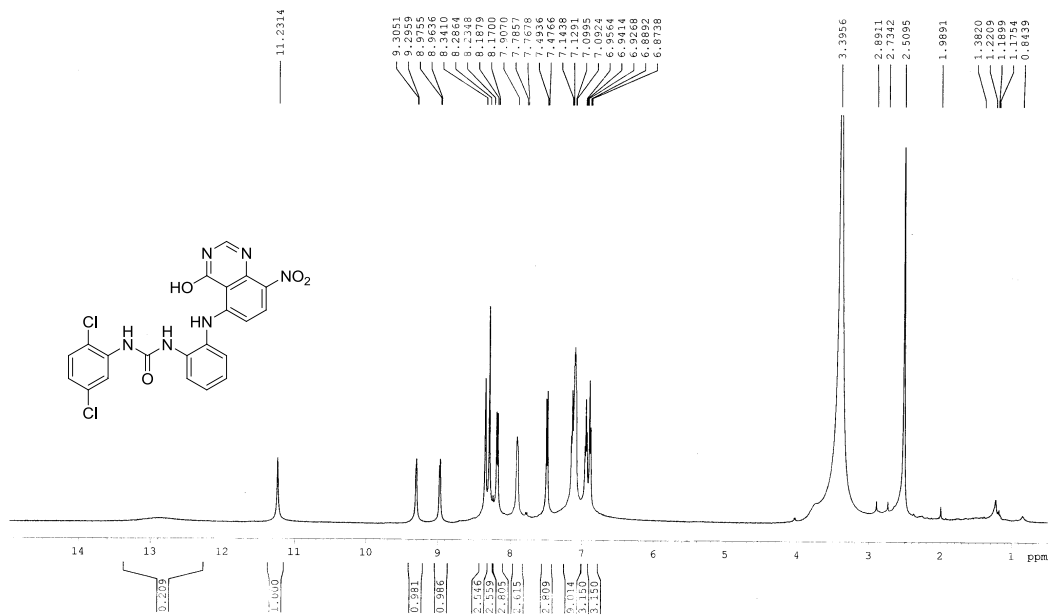

**<sup>1</sup>H-NMR spectrum of 6p**

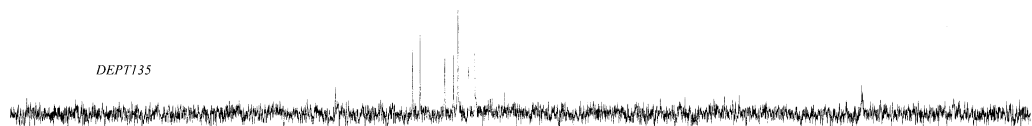

YUNNAN UNIVER. AV. DRX 500  
xiliang XL-105101 in DMSO  
11042707

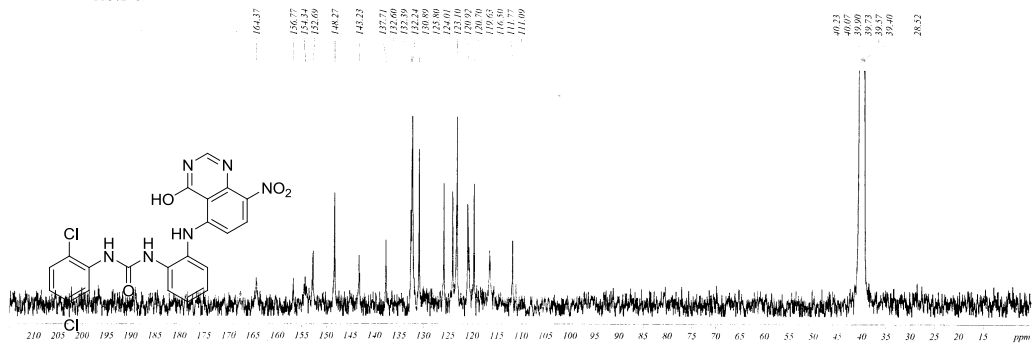

**<sup>13</sup>C-NMR spectrum of 6p**

For

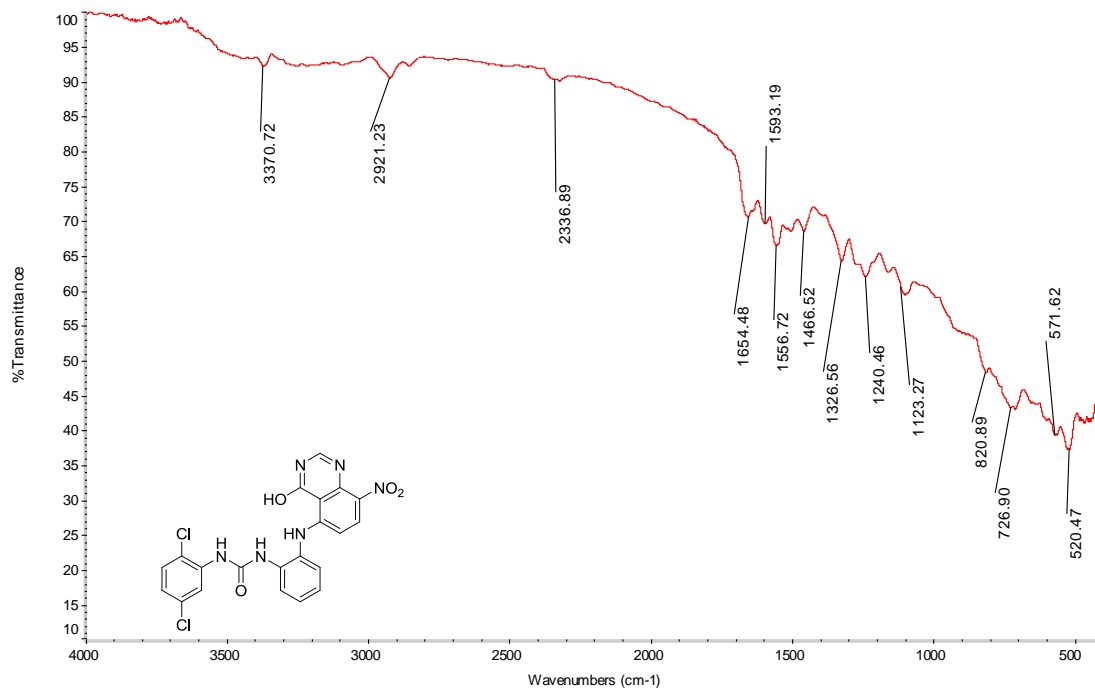

IR spectrum of 6p

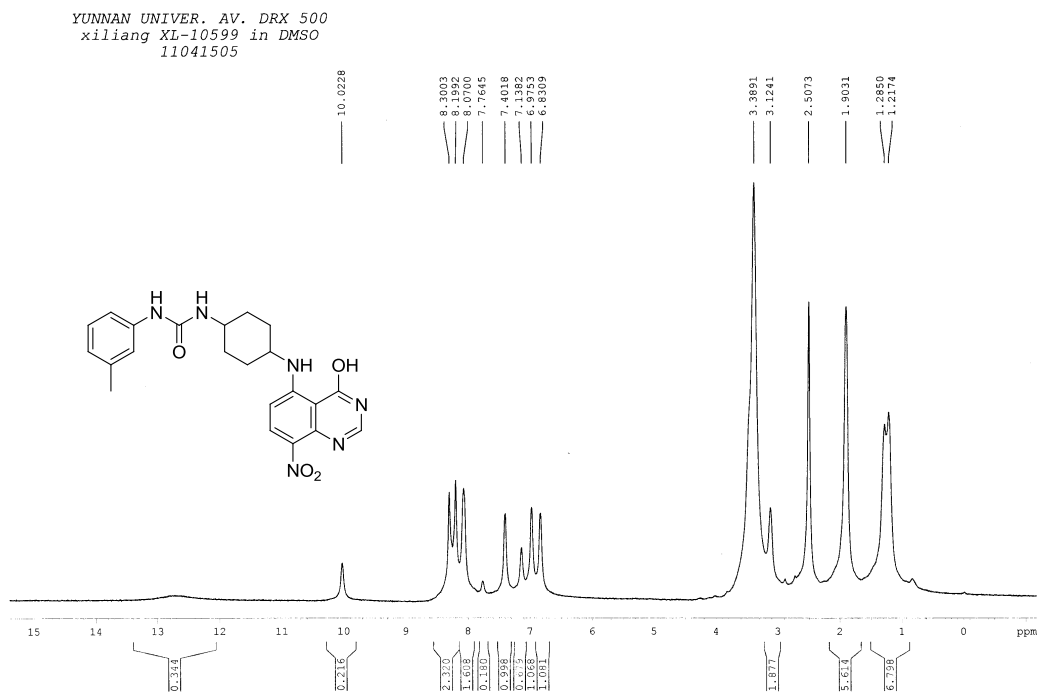

<sup>1</sup>H-NMR spectrum of 6q

## Supporting Information

For

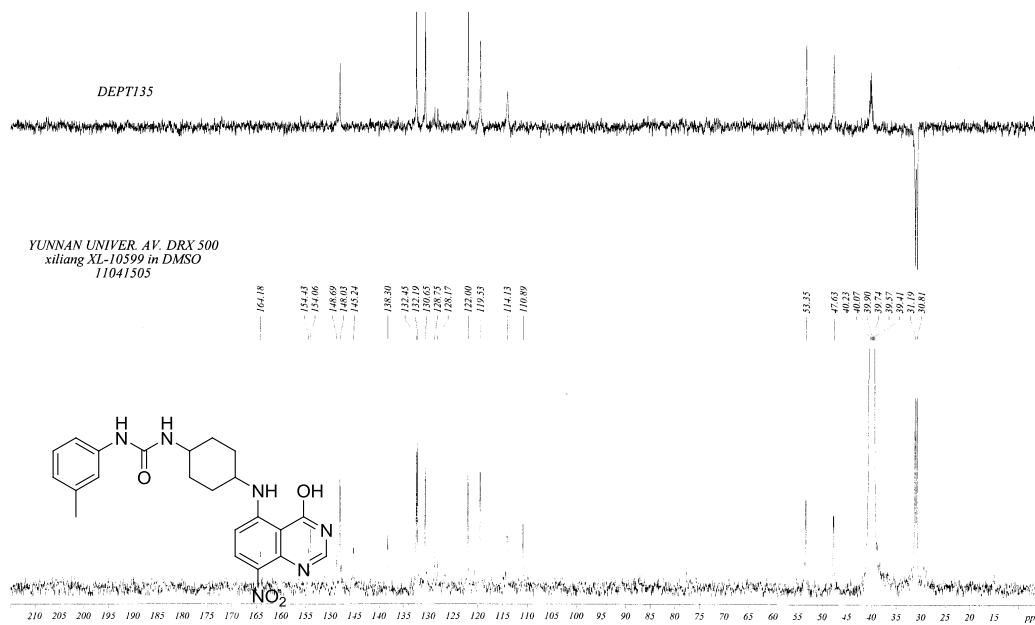

## <sup>13</sup>C-NMR spectrum of 6q

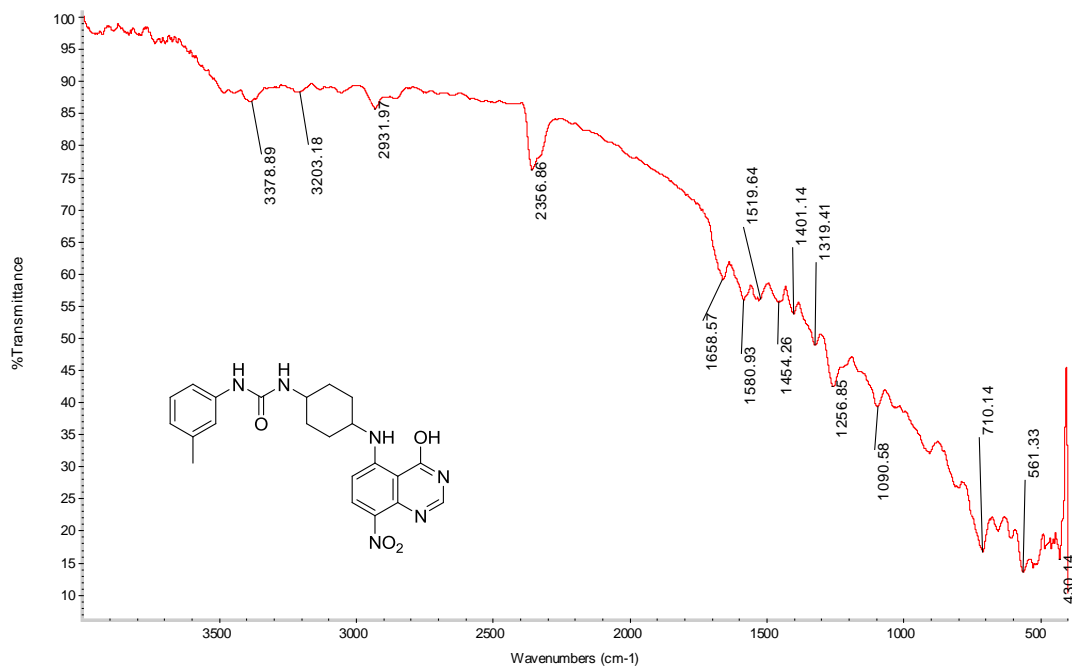

## IR spectrum of 6q

For

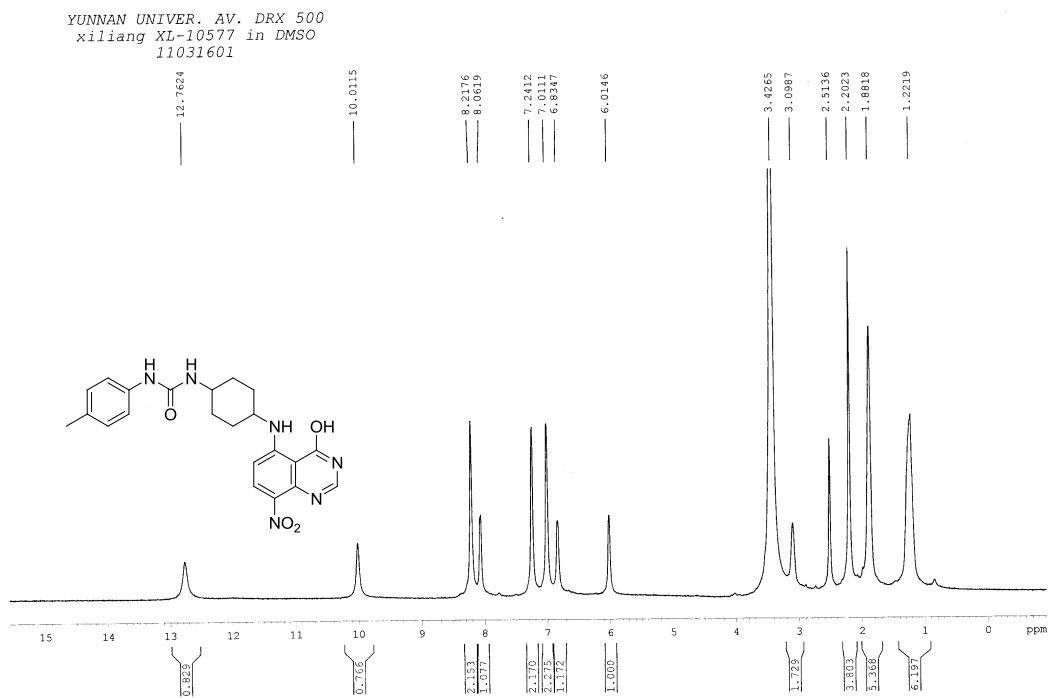

<sup>1</sup>H-NMR spectrum of 6r

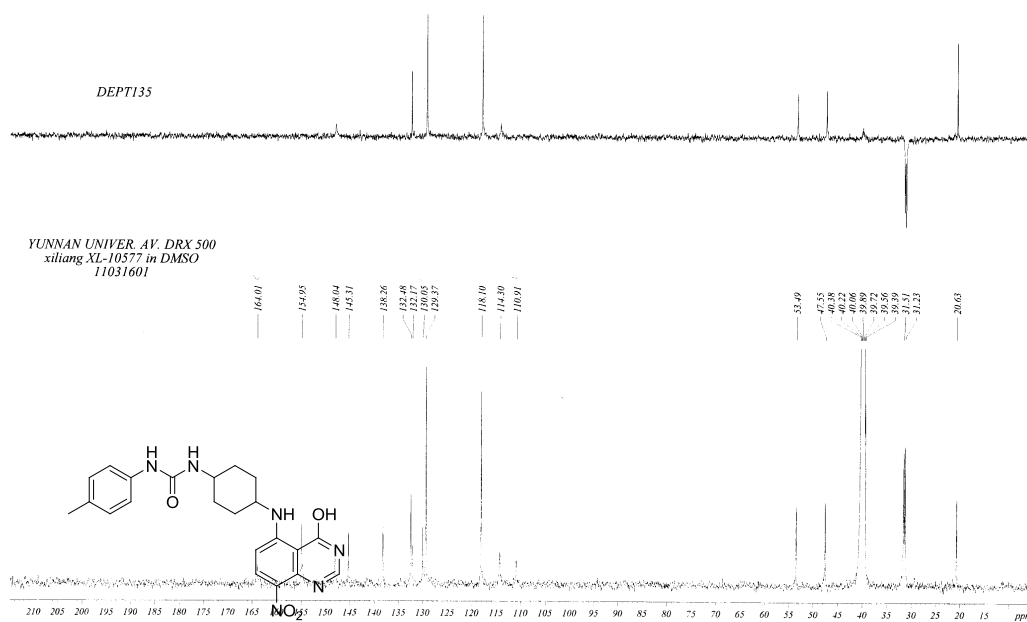

<sup>13</sup>C-NMR spectrum of 6r

### Supporting Information

For

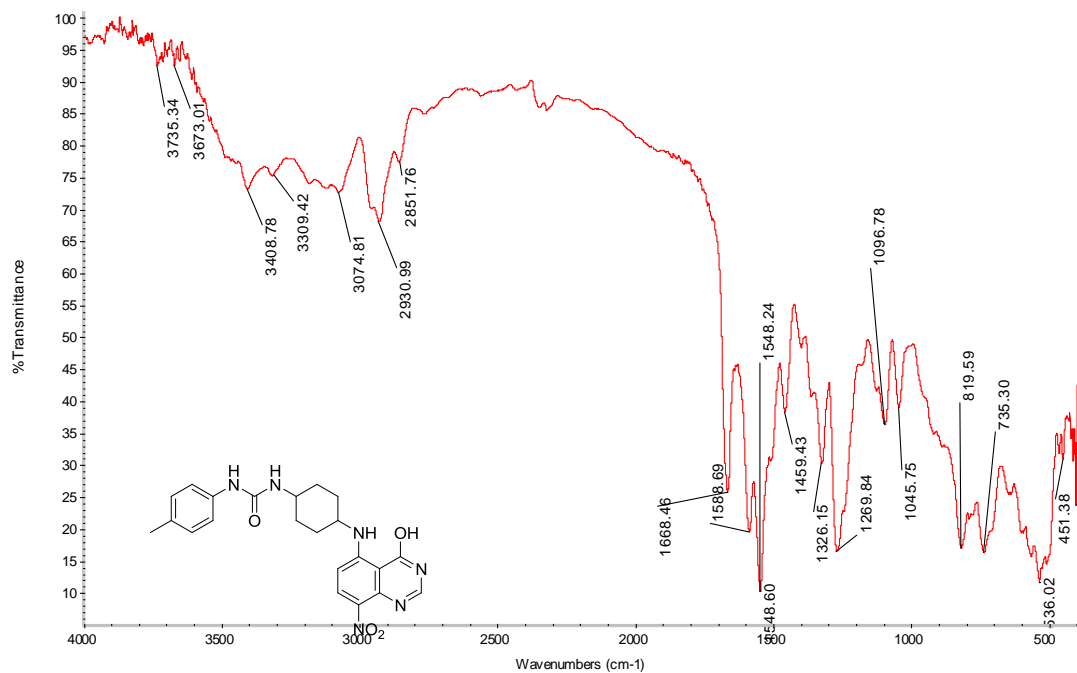

IR spectrum of 6r

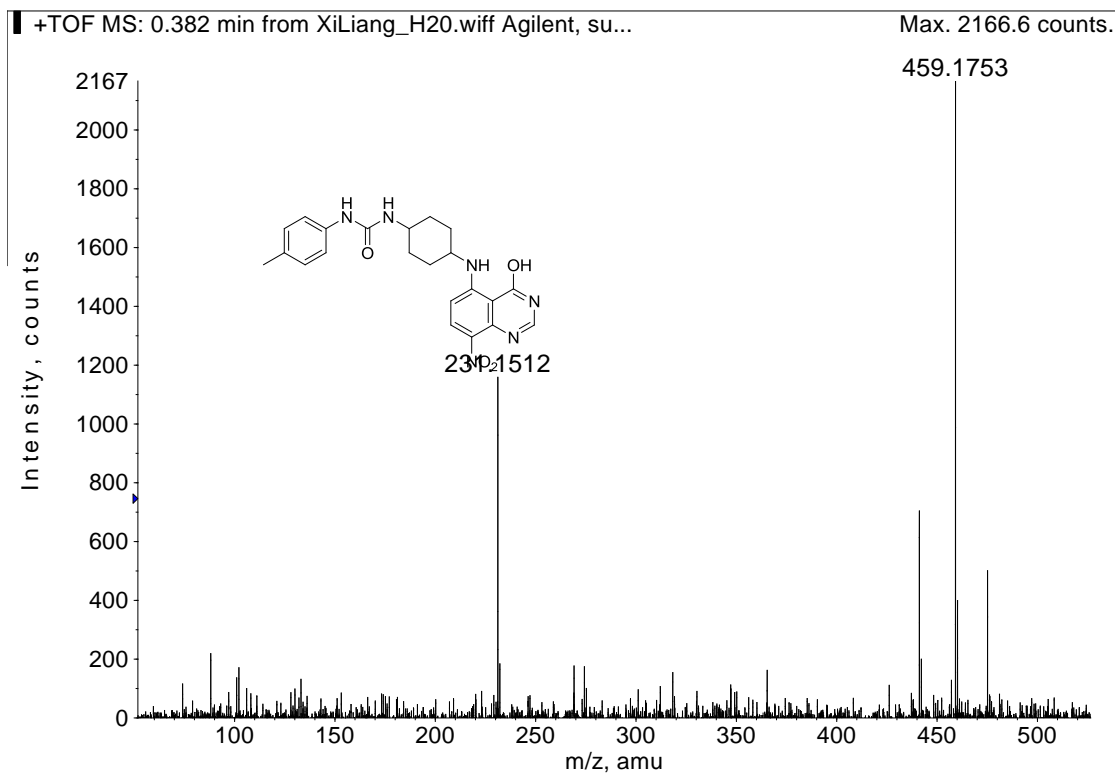

MS spectrum of 6r

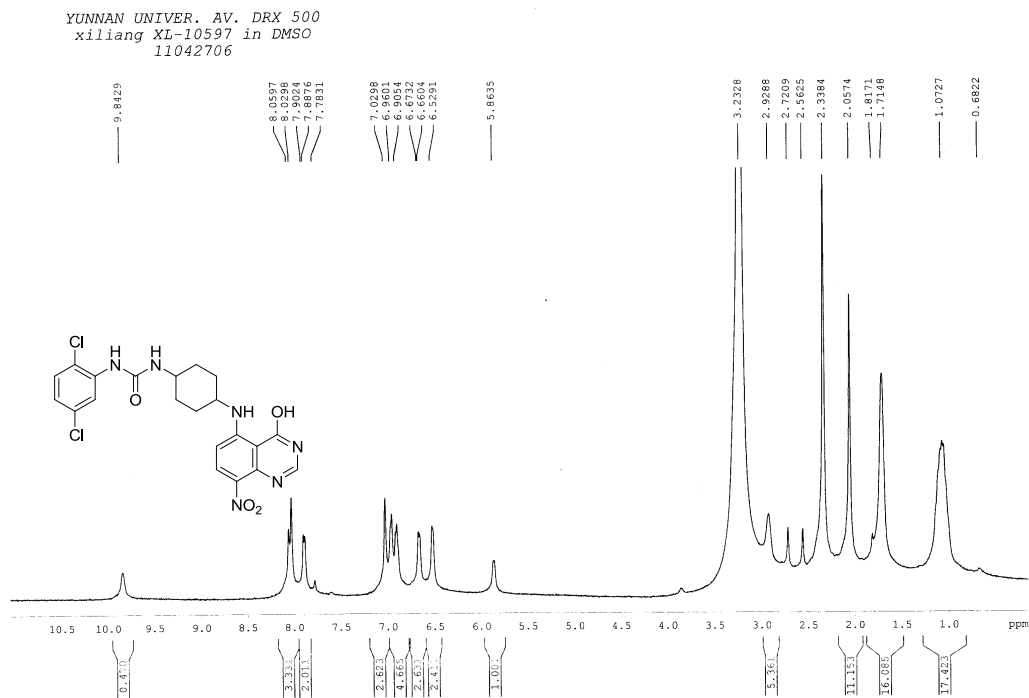

<sup>1</sup>H-NMR spectrum of 6s

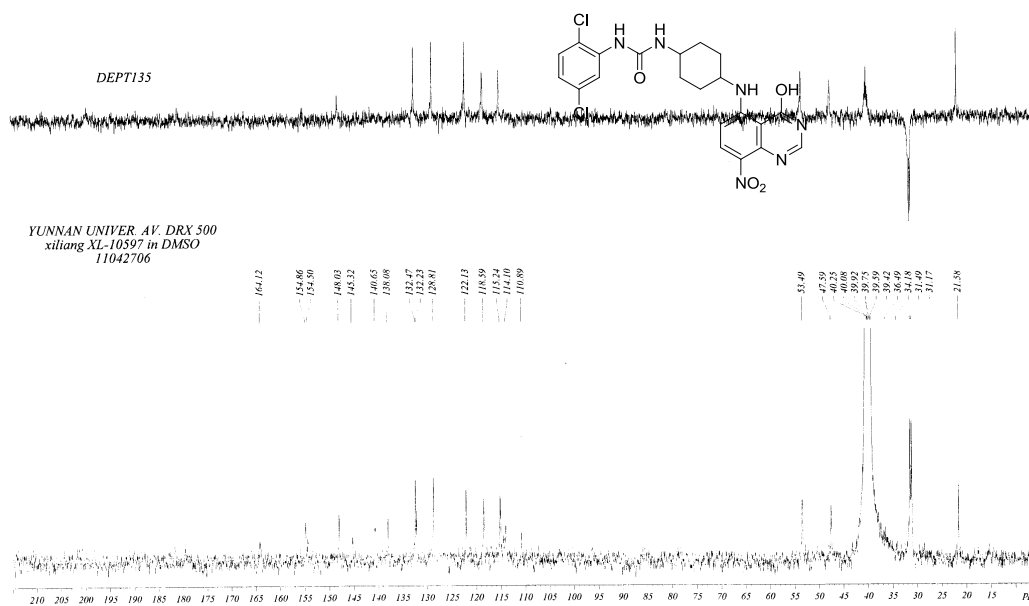

<sup>13</sup>C-NMR spectrum of 6s



### Supporting Information

For

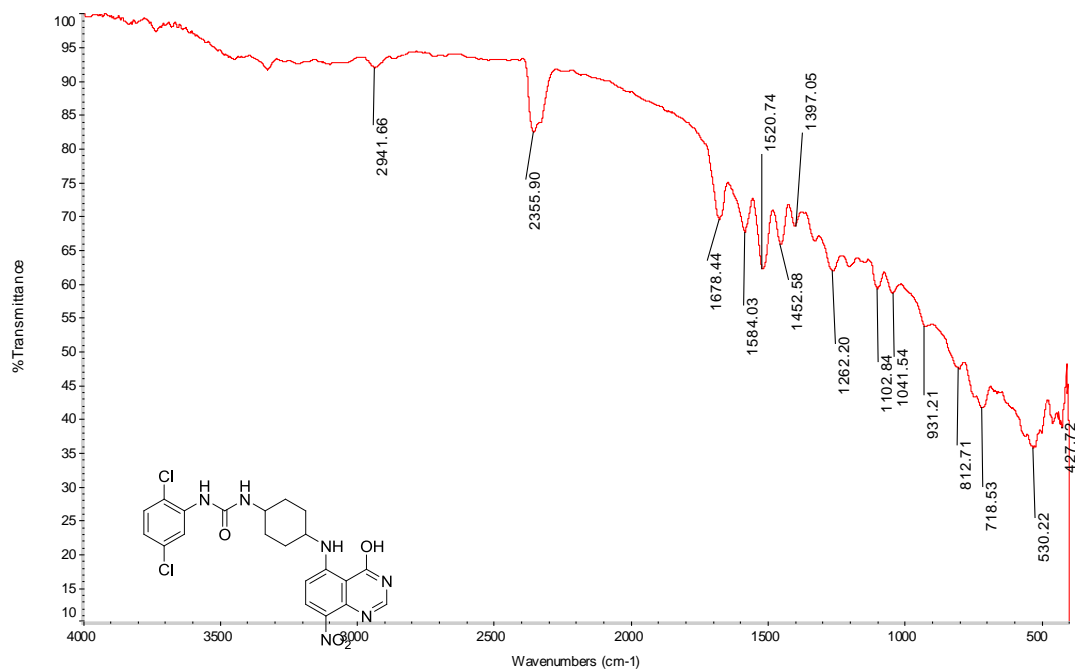

IR spectrum of 6s

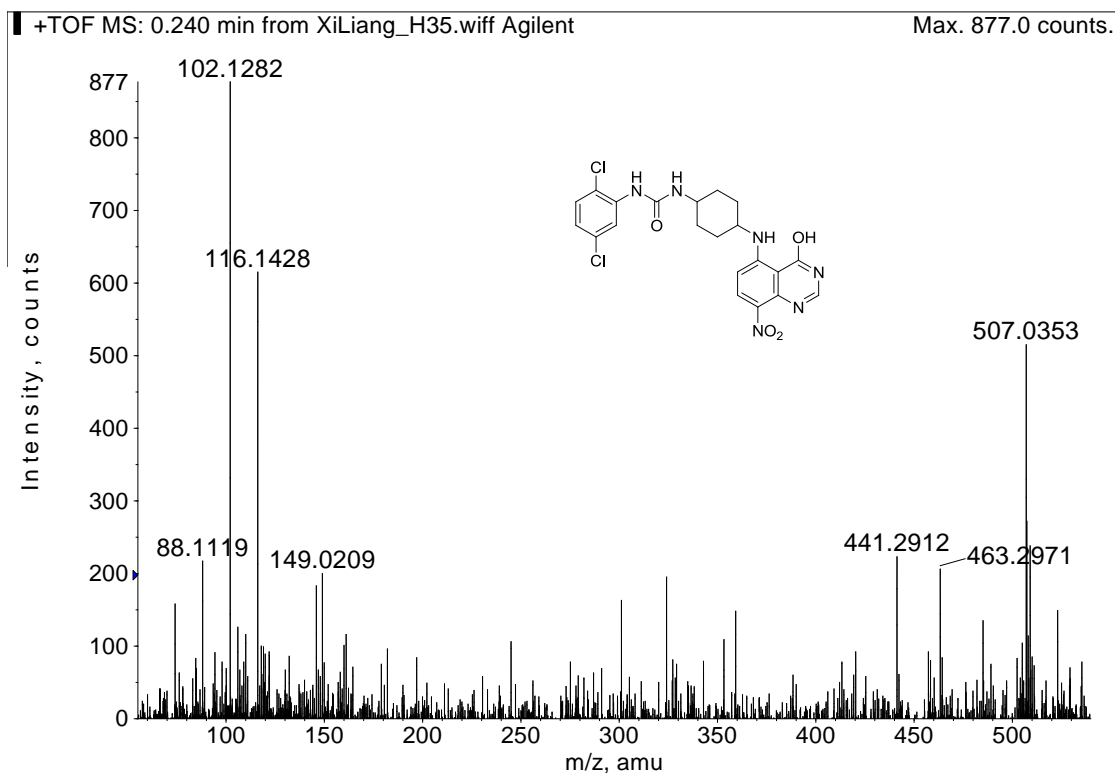

MS spectrum of 6s

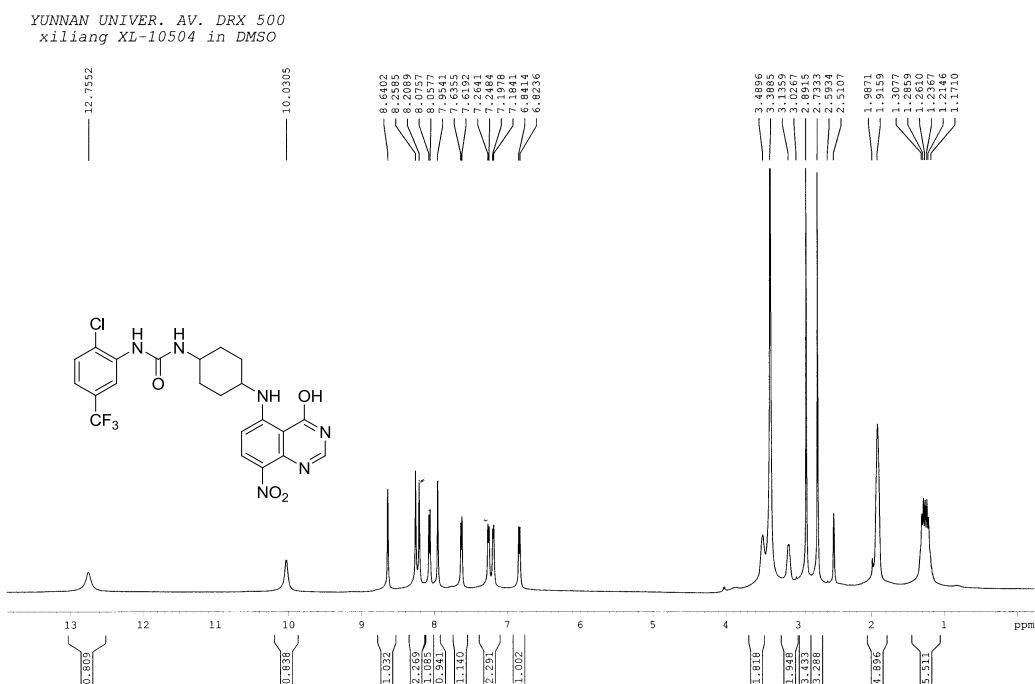

<sup>1</sup>H-NMR spectrum of 6t

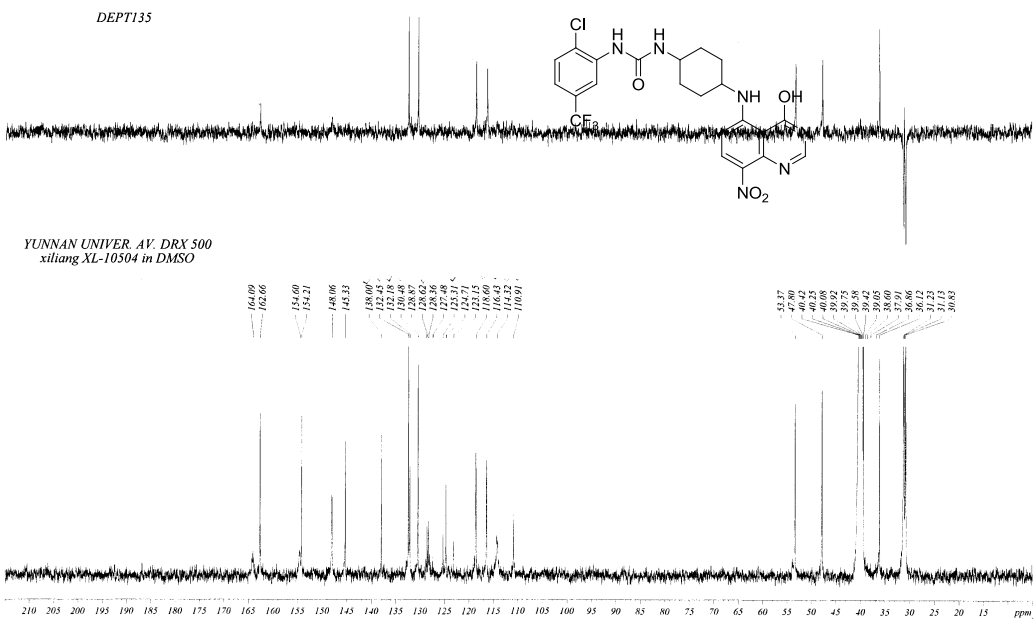

<sup>13</sup>C-NMR spectrum of 6t

### Supporting Information

For

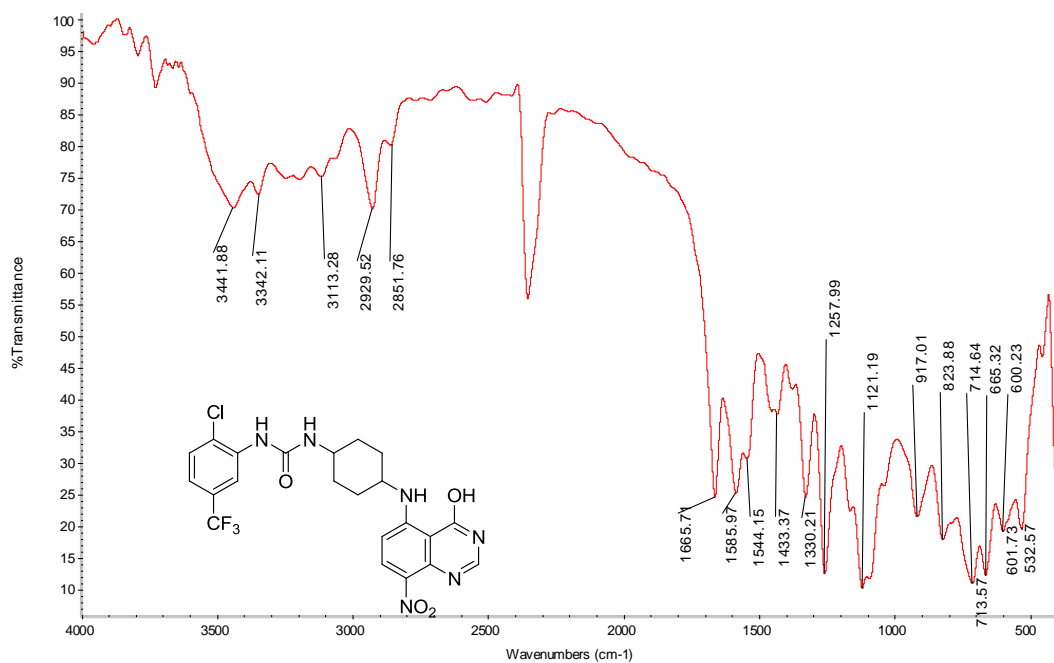

IR spectrum of 6t

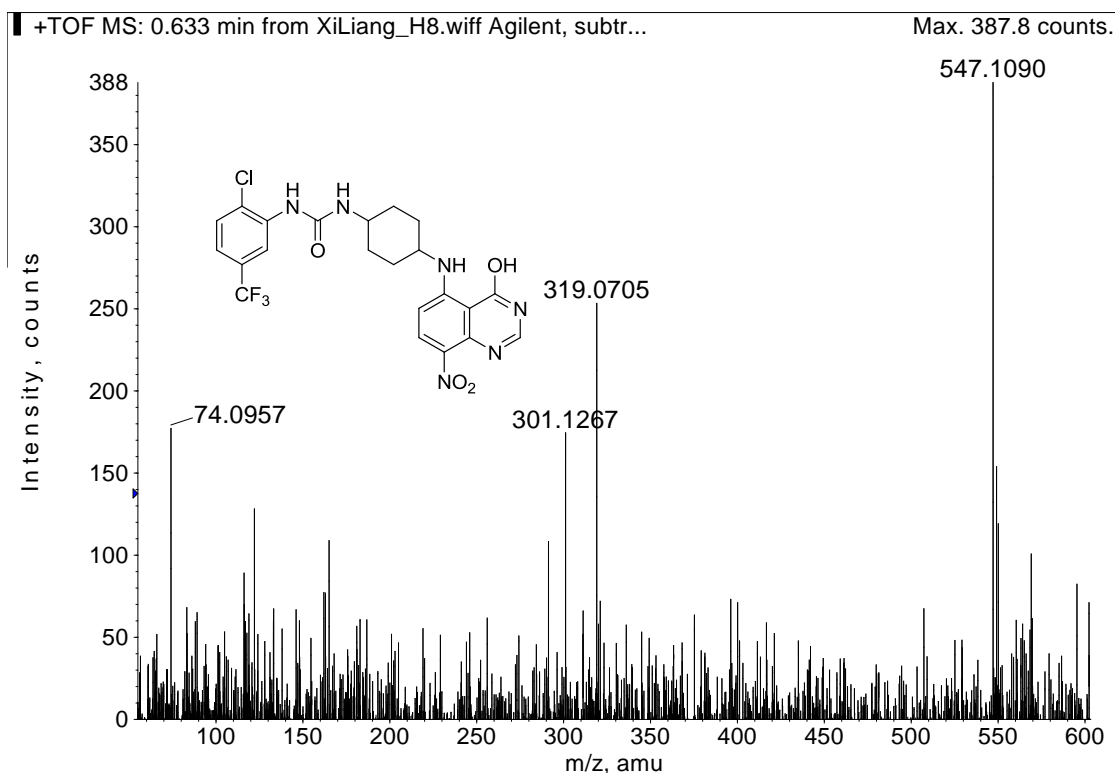

MS spectrum of 6t

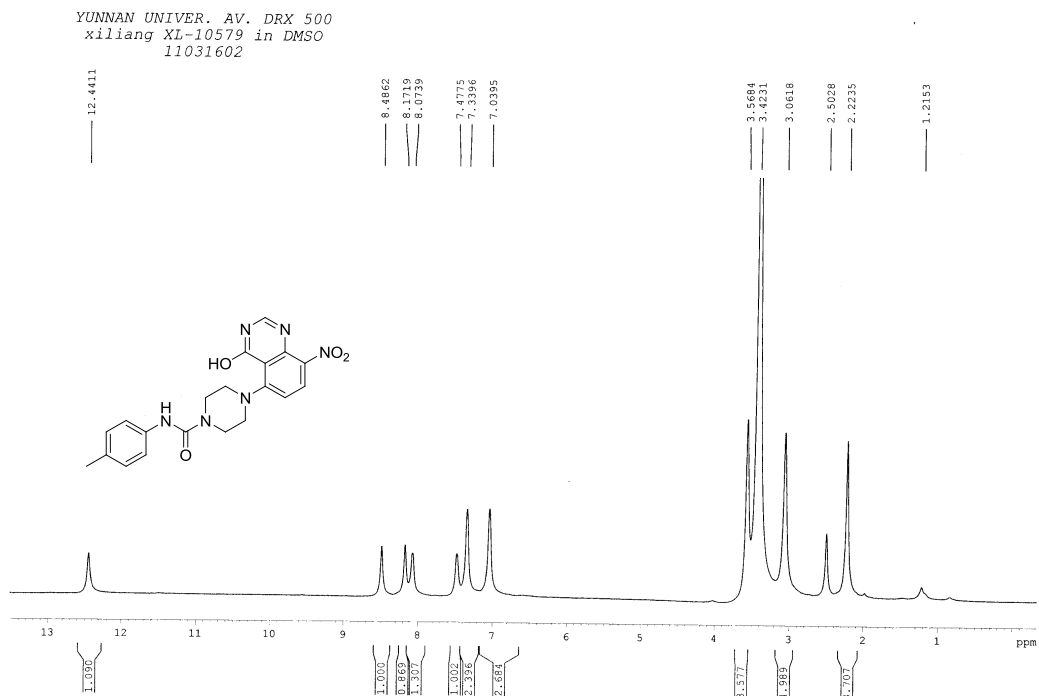

<sup>1</sup>H-NMR spectrum of 6u

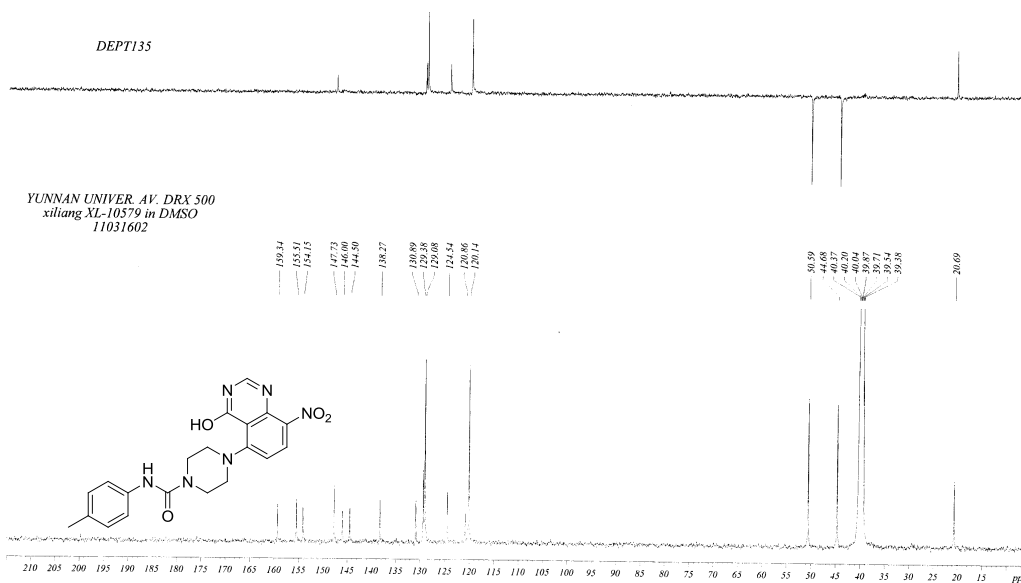

<sup>13</sup>C-NMR spectrum of 6u

## Supporting Information

For

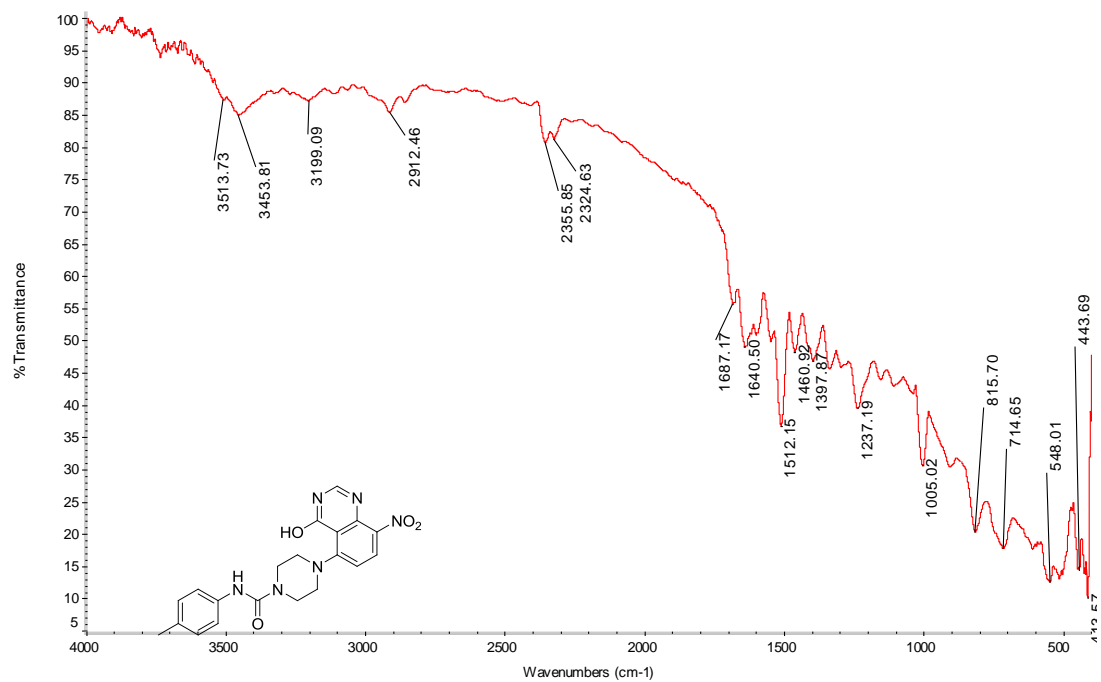

**IR spectrum of 6u**

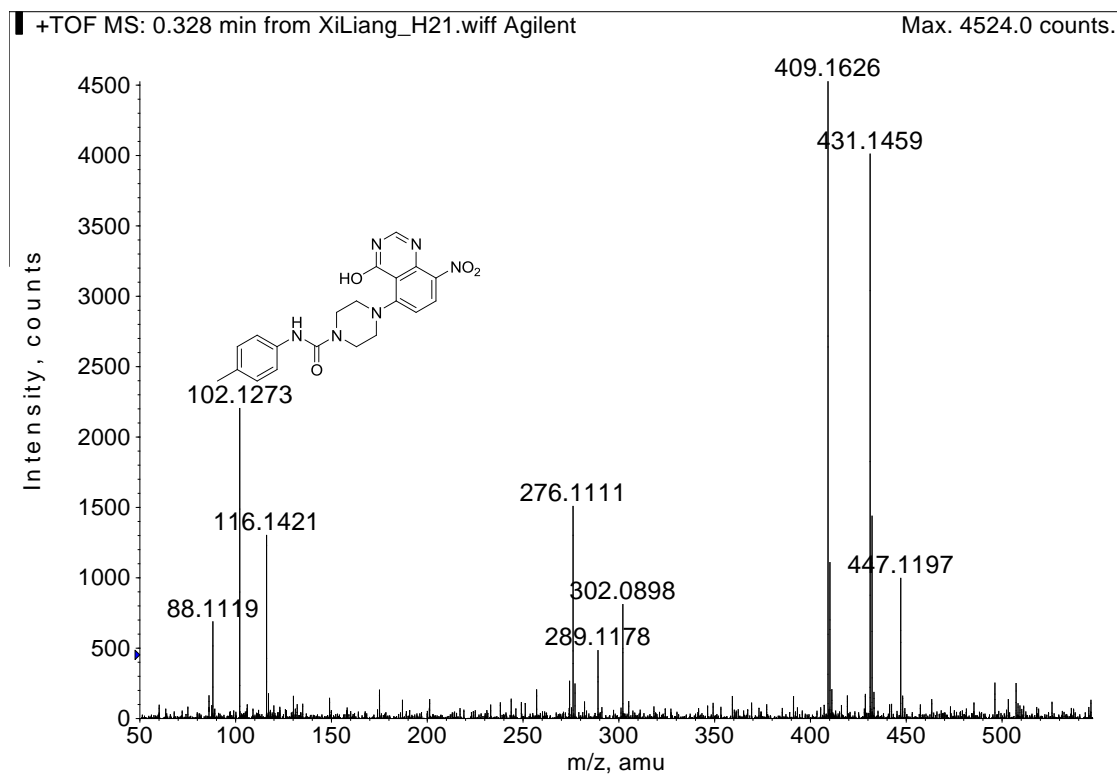

**MS spectrum of 6u**

YUNNAN UNIVER. AV. DRX 500  
 xiliang XL-10478 in DMSO

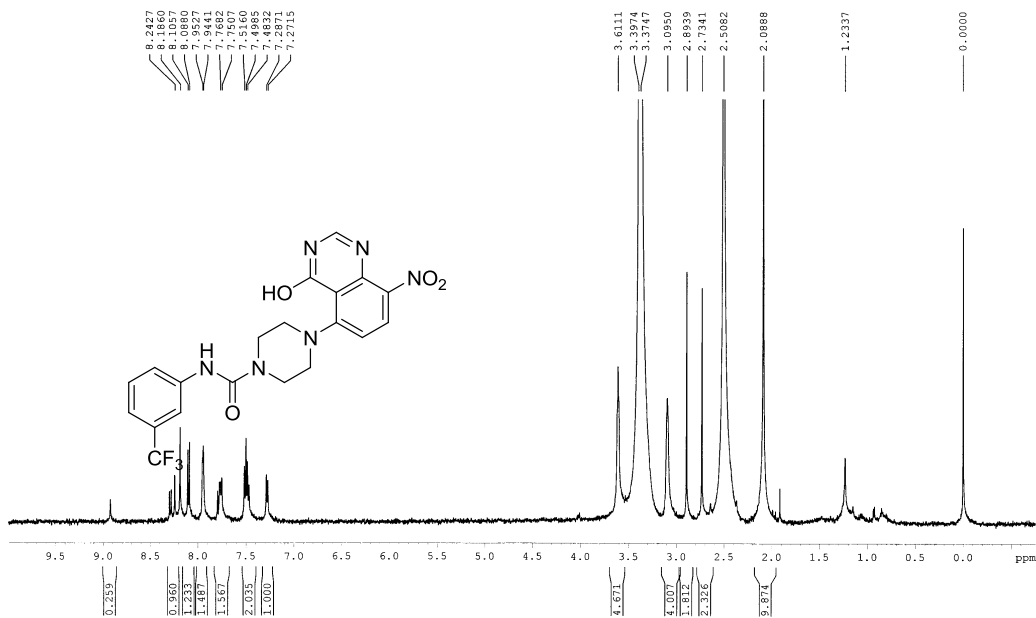

<sup>1</sup>H-NMR spectrum of 6v

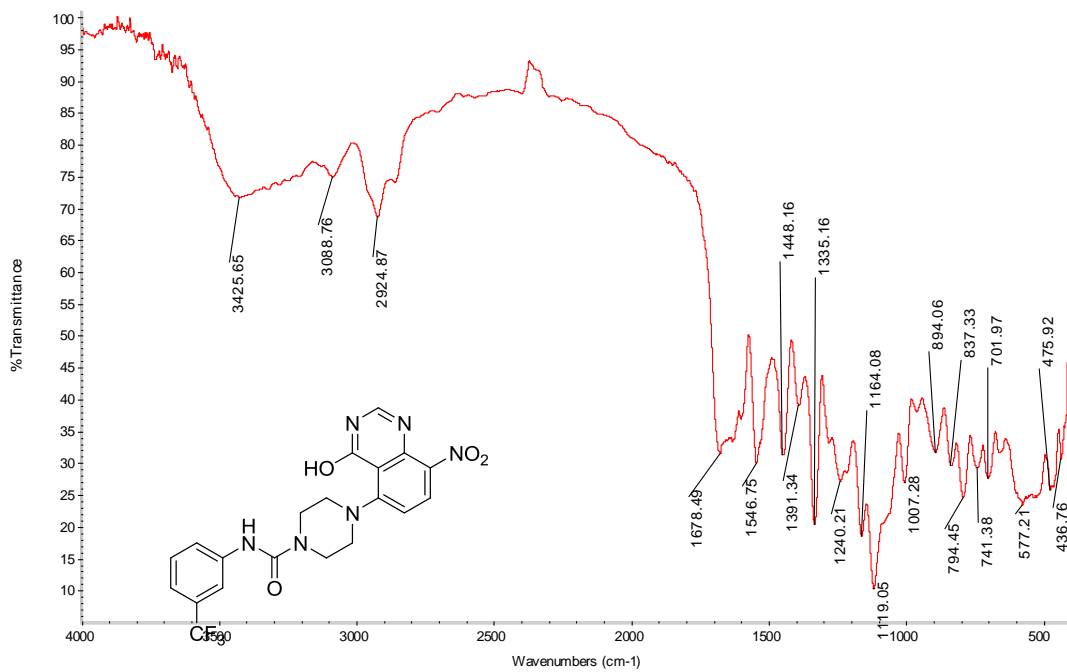

IR spectrum of 6v

Supporting Information  
For

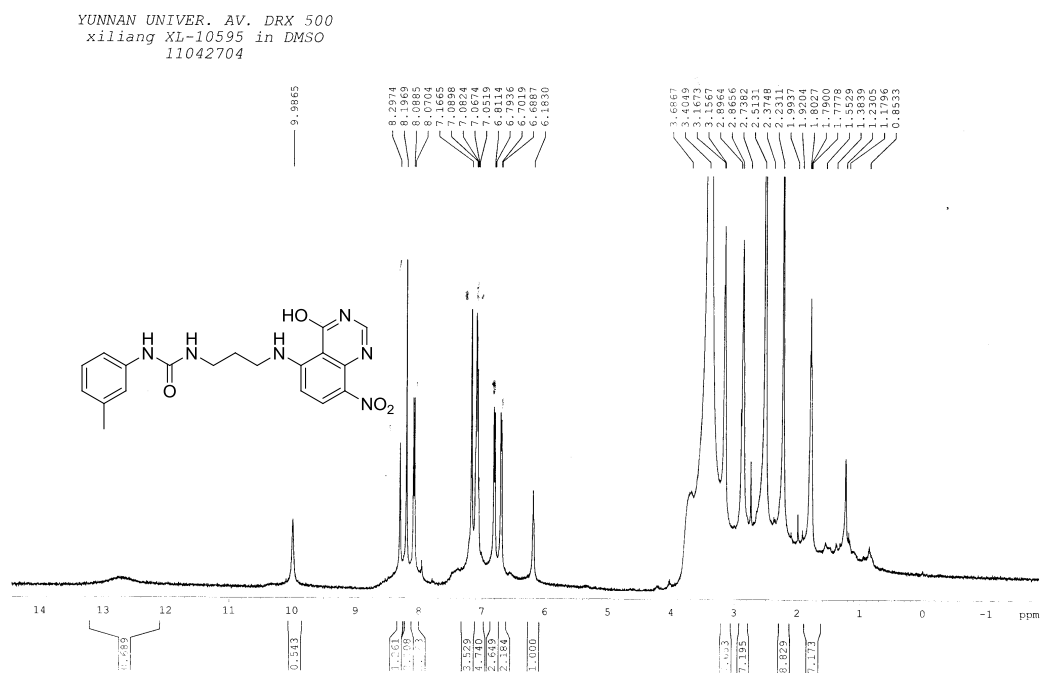

<sup>1</sup>H-NMR spectrum of 6w

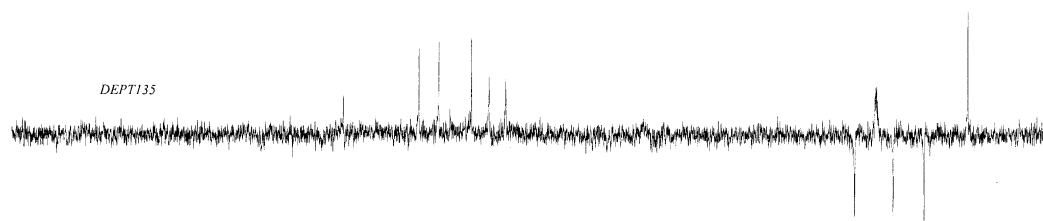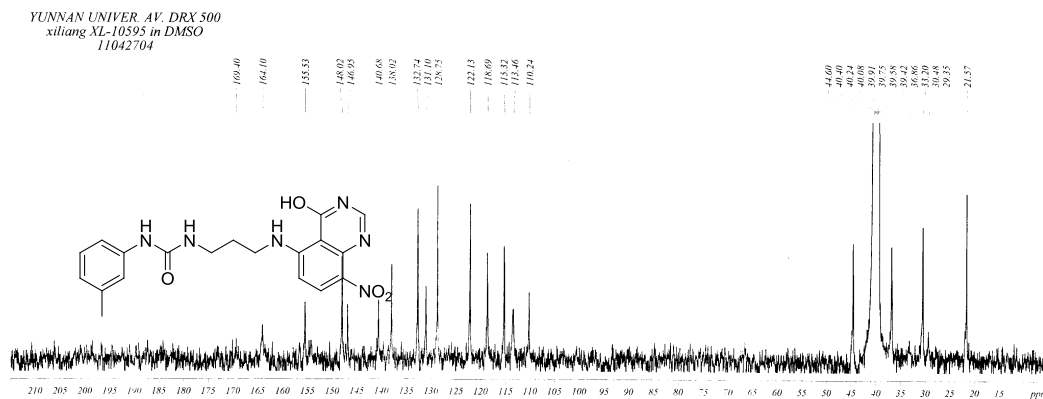

<sup>13</sup>C-NMR spectrum of 6w

For

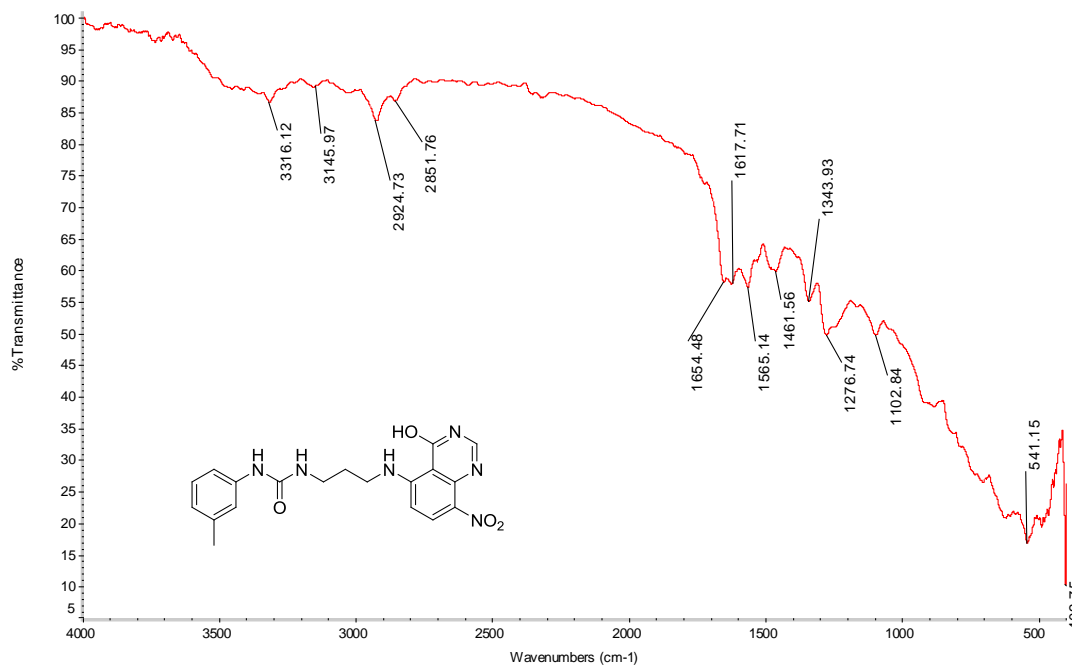

IR spectrum of 6w

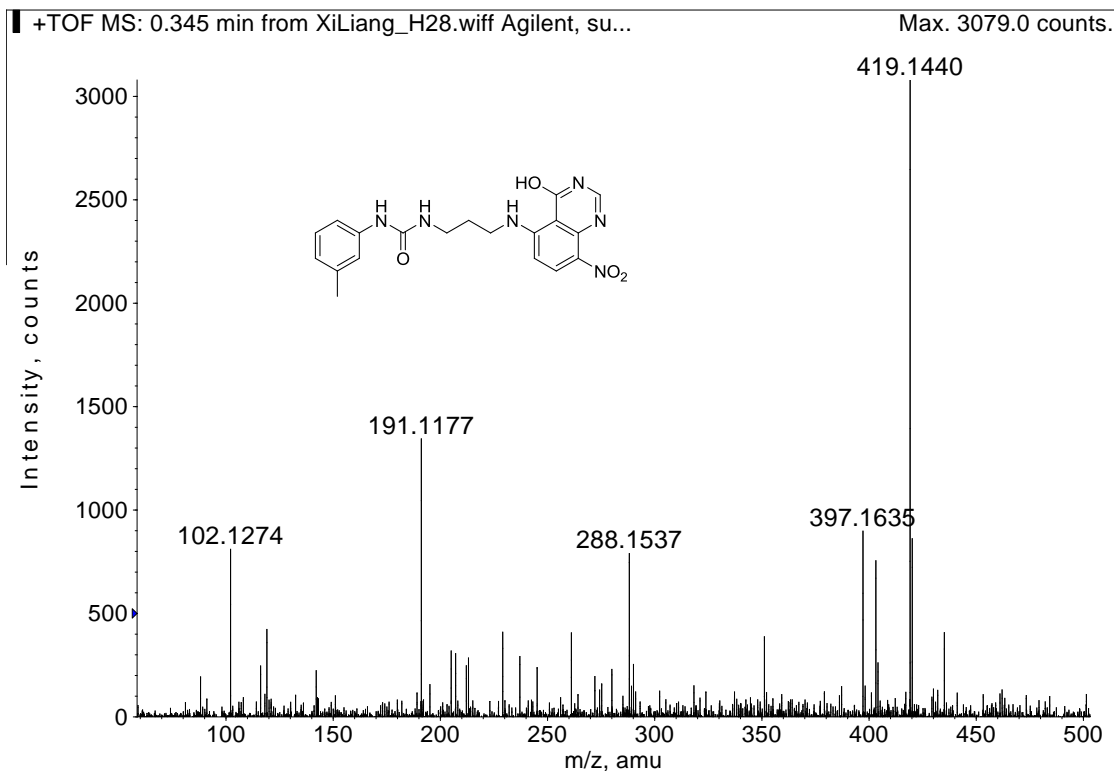

MS spectrum of 6w



Supporting Information

For

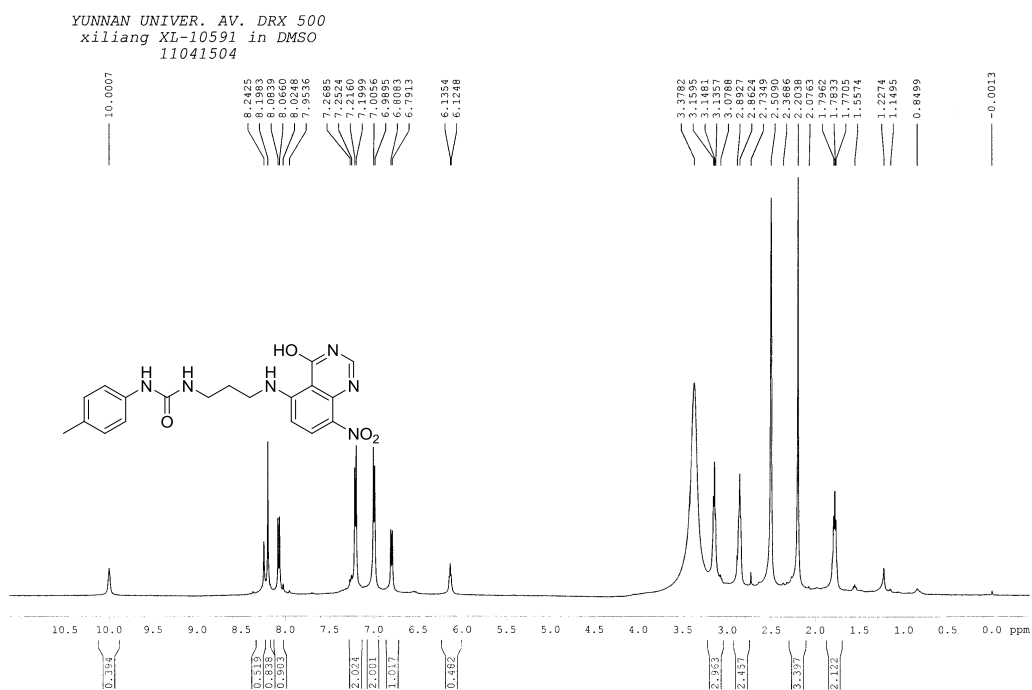

<sup>1</sup>H-NMR spectrum of 6x

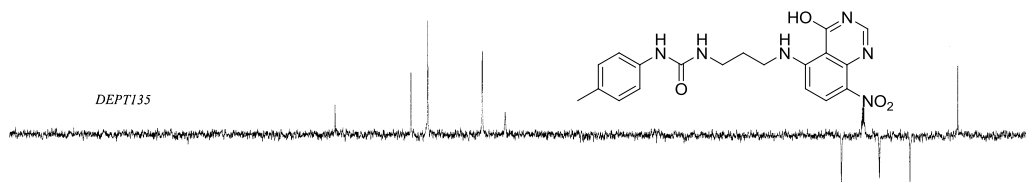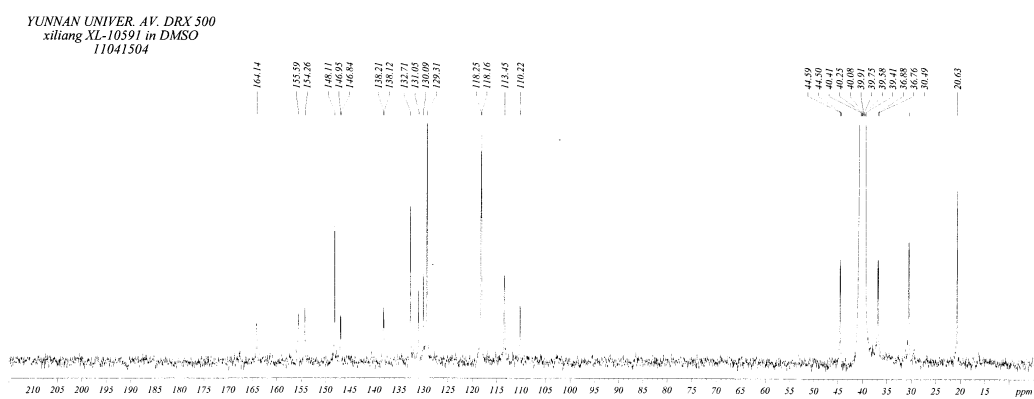

<sup>13</sup>C-NMR spectrum of 6x

For

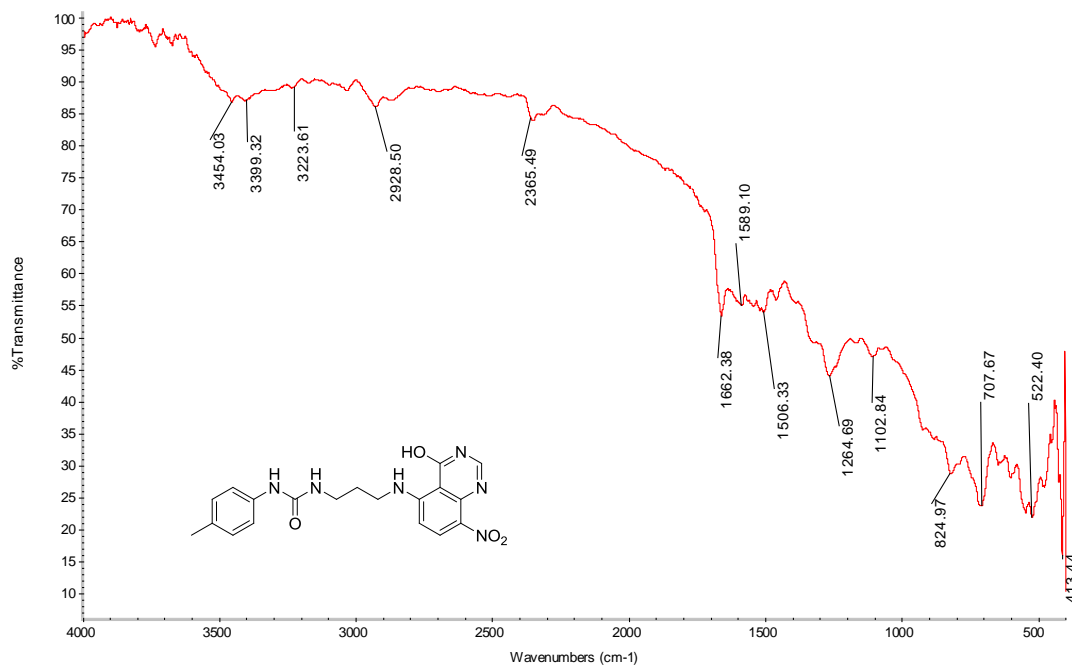

IR spectrum of 6x

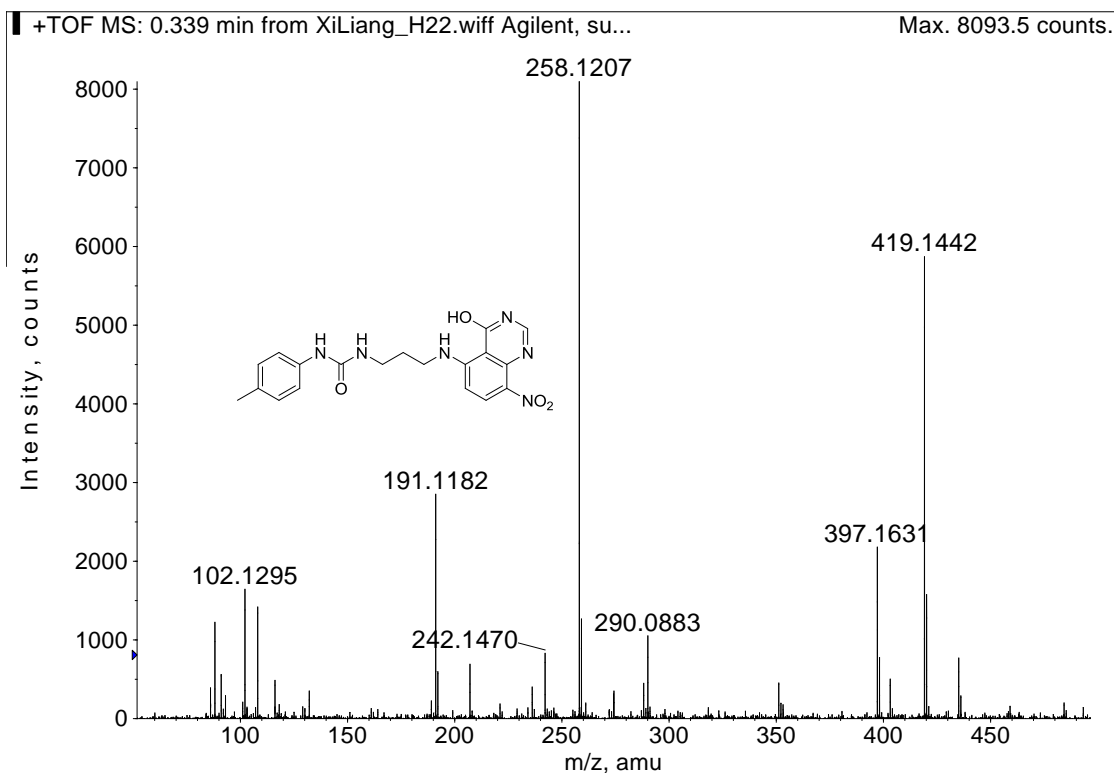

MS spectrum of 6x

### Supporting Information

For

YUNNAN UNIVER. AV. DRX 500  
xiliang XL-10480 in DMSO

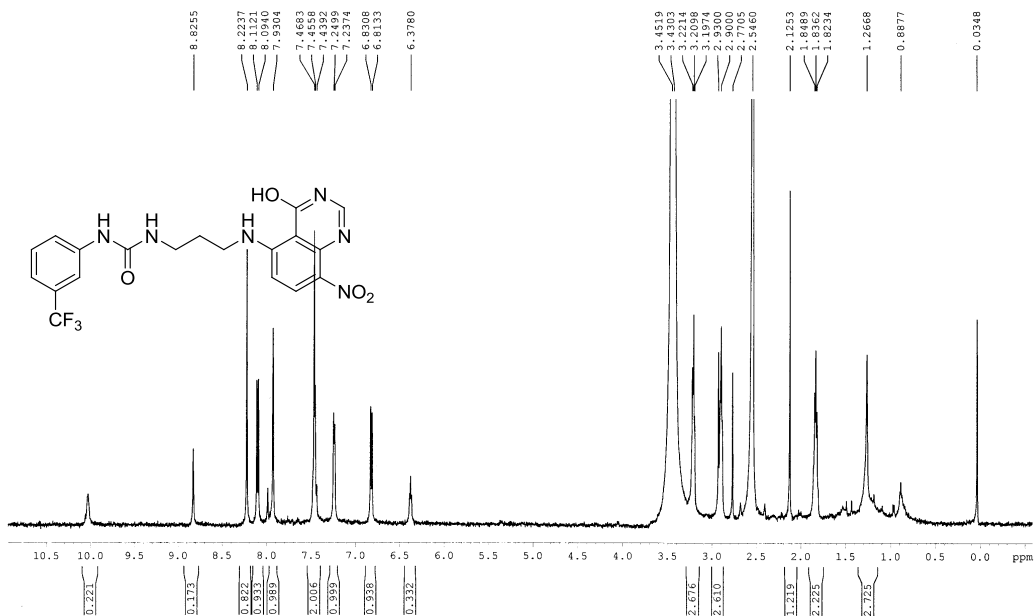

**<sup>1</sup>H-NMR spectrum of 6y**

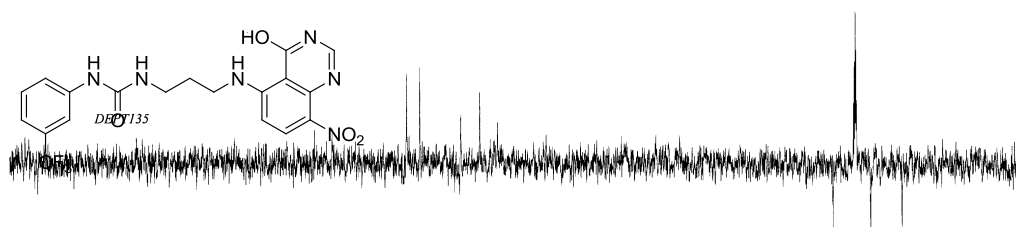

YUNNAN UNIVER. AV. DRX 500  
xiliang XL-10480 in DMSO

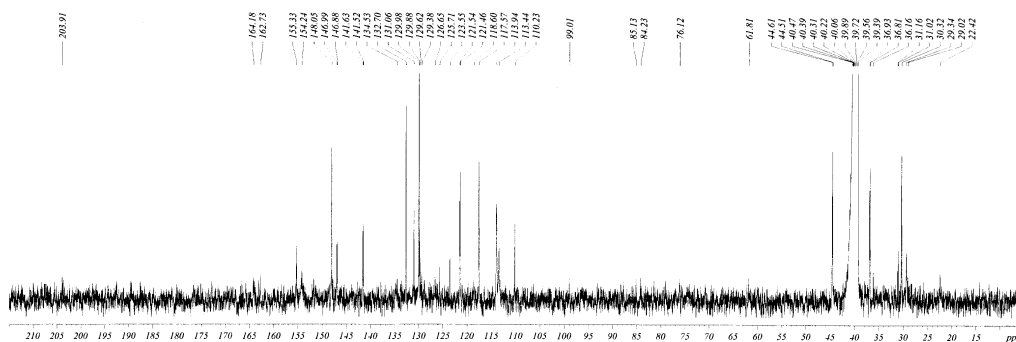

**<sup>13</sup>C-NMR spectrum of 6y**

For

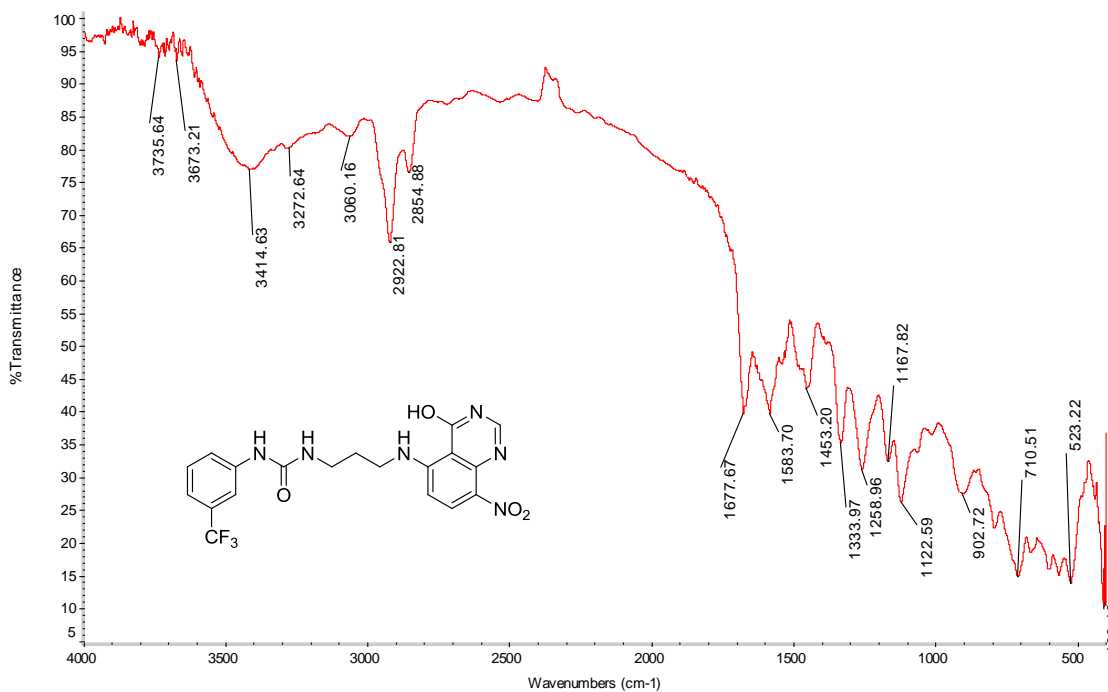

IR spectrum of 6y

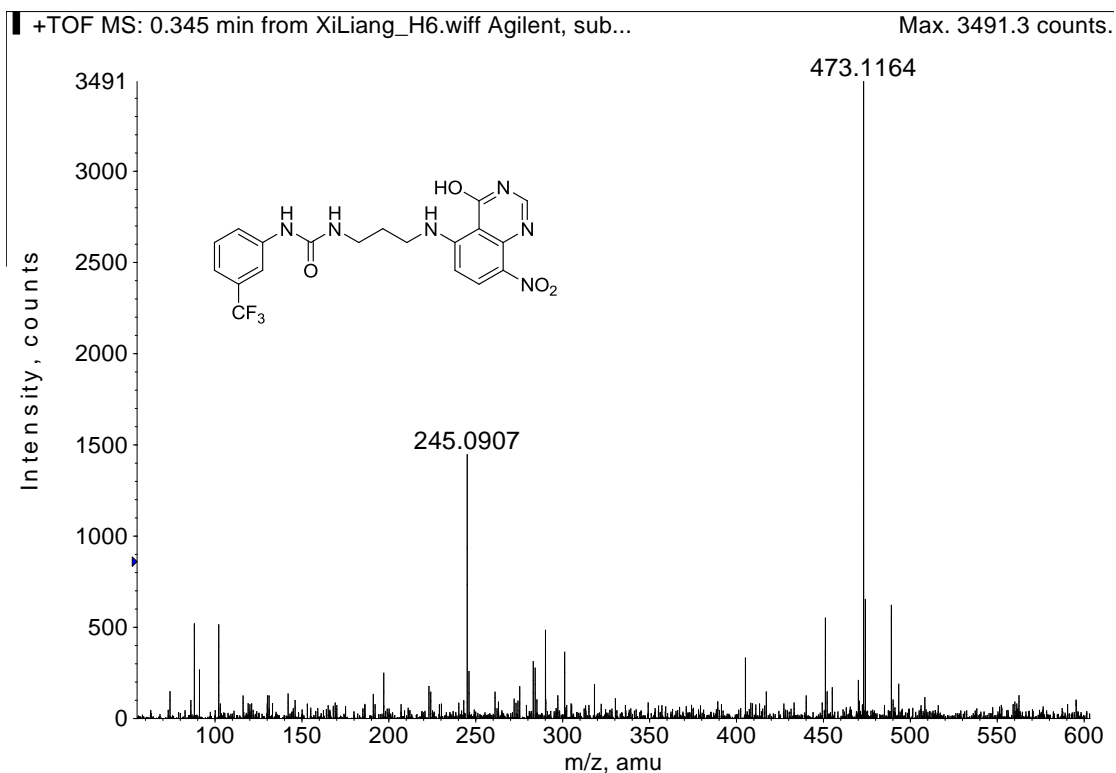

MS spectrum of 6y

## Supporting Information

For

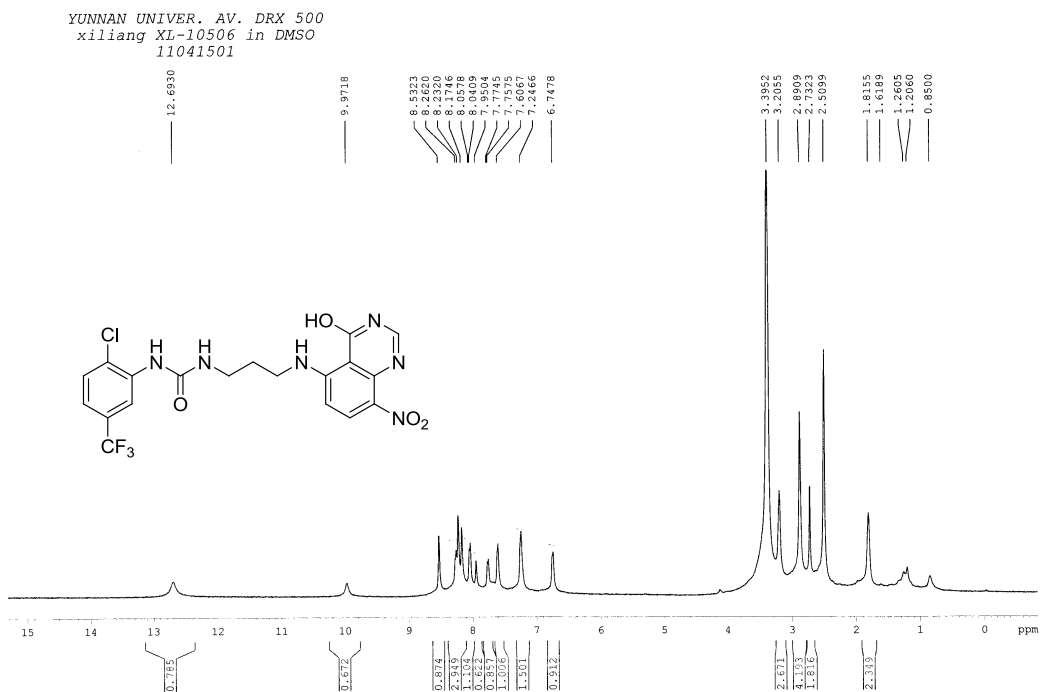

## <sup>1</sup>H-NMR spectrum of 6z

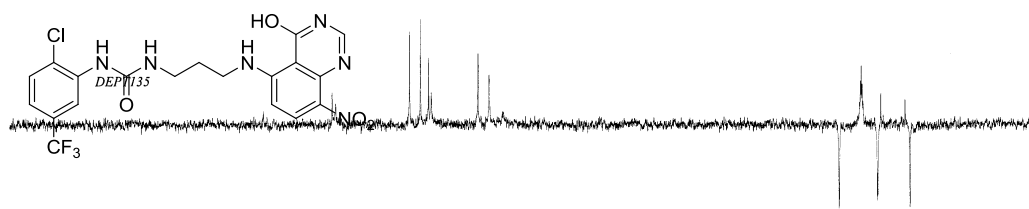

YUNNAN UNIVER. AV. DRX 500  
xiliang XL-10506 in DMSO  
11041501

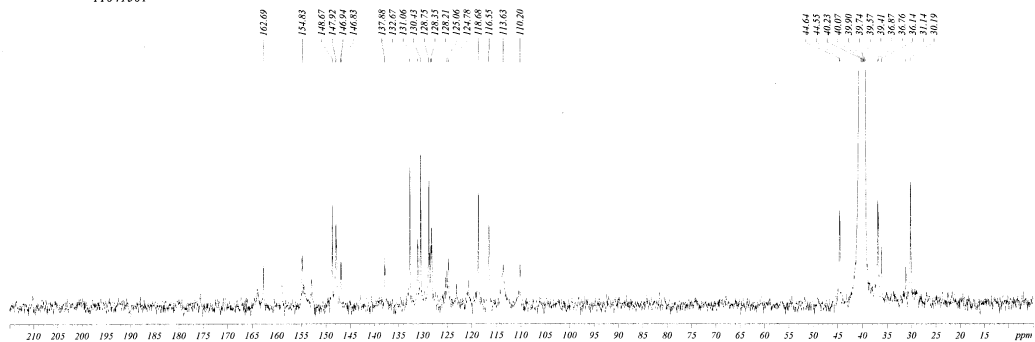

## <sup>13</sup>C-NMR spectrum of 6z

For

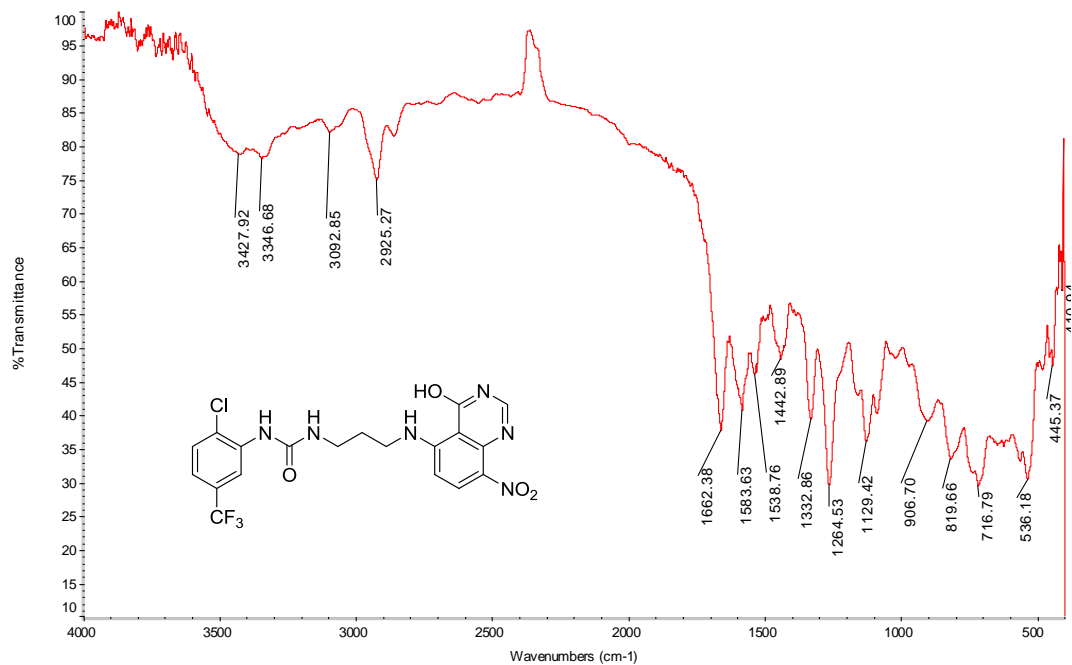

IR spectrum of 6z

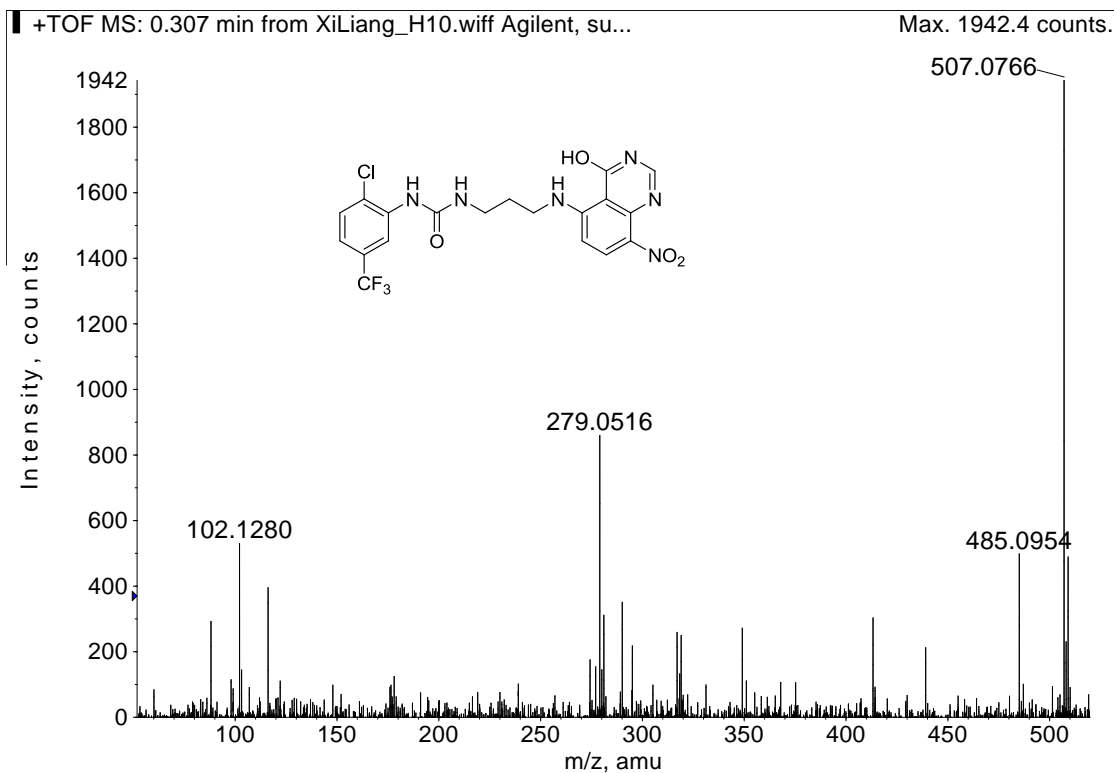

MS spectrum of 6z

Supporting Information

For

The calculated logP and logD(PH = 7.4) of  
 4-hydroxy quinazolines and none 4-hydroxy quinazolines

| <b>4-hydroxy<br/>quinazolines</b>                                                                    | <b>logP</b> | <b>logD(7.4)</b> | <b>none 4-hydroxy<br/>quinazolines</b>                                                                 | <b>logP</b> | <b>logD(7.4)</b> |
|------------------------------------------------------------------------------------------------------|-------------|------------------|--------------------------------------------------------------------------------------------------------|-------------|------------------|
| 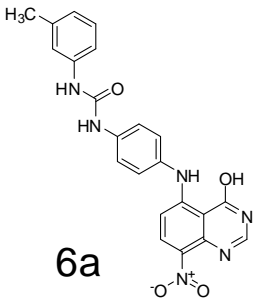 <p><b>6a</b></p>   | <b>2.52</b> | <b>0.024</b>     |  <p><b>6a'</b></p>   | <b>3.11</b> | <b>3.11</b>      |
|  <p><b>6b</b></p>  | <b>2.52</b> | <b>0.024</b>     |  <p><b>6b'</b></p>  | <b>3.11</b> | <b>3.11</b>      |
|  <p><b>6d</b></p> | <b>3.42</b> | <b>0.92</b>      |  <p><b>6d'</b></p> | <b>4.00</b> | <b>4.00</b>      |
|  <p><b>6e</b></p> | <b>3.53</b> | <b>1.03</b>      |  <p><b>6e'</b></p> | <b>4.12</b> | <b>4.12</b>      |

For

|                                                                                                      |             |             |                                                                                                       |             |             |
|------------------------------------------------------------------------------------------------------|-------------|-------------|-------------------------------------------------------------------------------------------------------|-------------|-------------|
| 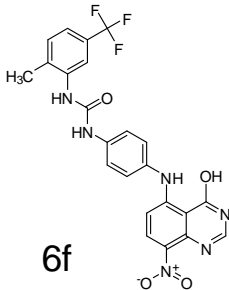 <p><b>6f</b></p>   | <b>3.88</b> | <b>1.38</b> |  <p><b>6f'</b></p>   | <b>4.46</b> | <b>4.46</b> |
|  <p><b>6g</b></p>   | <b>4.50</b> | <b>2.00</b> |  <p><b>6g'</b></p>   | <b>5.09</b> | <b>5.09</b> |
|  <p><b>6k</b></p>  | <b>4.95</b> | <b>2.45</b> |  <p><b>6k'</b></p>  | <b>5.53</b> | <b>5.53</b> |
|  <p><b>6p</b></p> | <b>2.48</b> | <b>1.78</b> |  <p><b>6p'</b></p> | <b>4.87</b> | <b>4.87</b> |
|  <p><b>6r</b></p> | <b>2.64</b> | <b>0.14</b> |  <p><b>6r'</b></p> | <b>3.23</b> | <b>3.23</b> |



Supporting Information  
For  
The Binding mode of Compound **6f** in EGFR Kinase activity pocket area

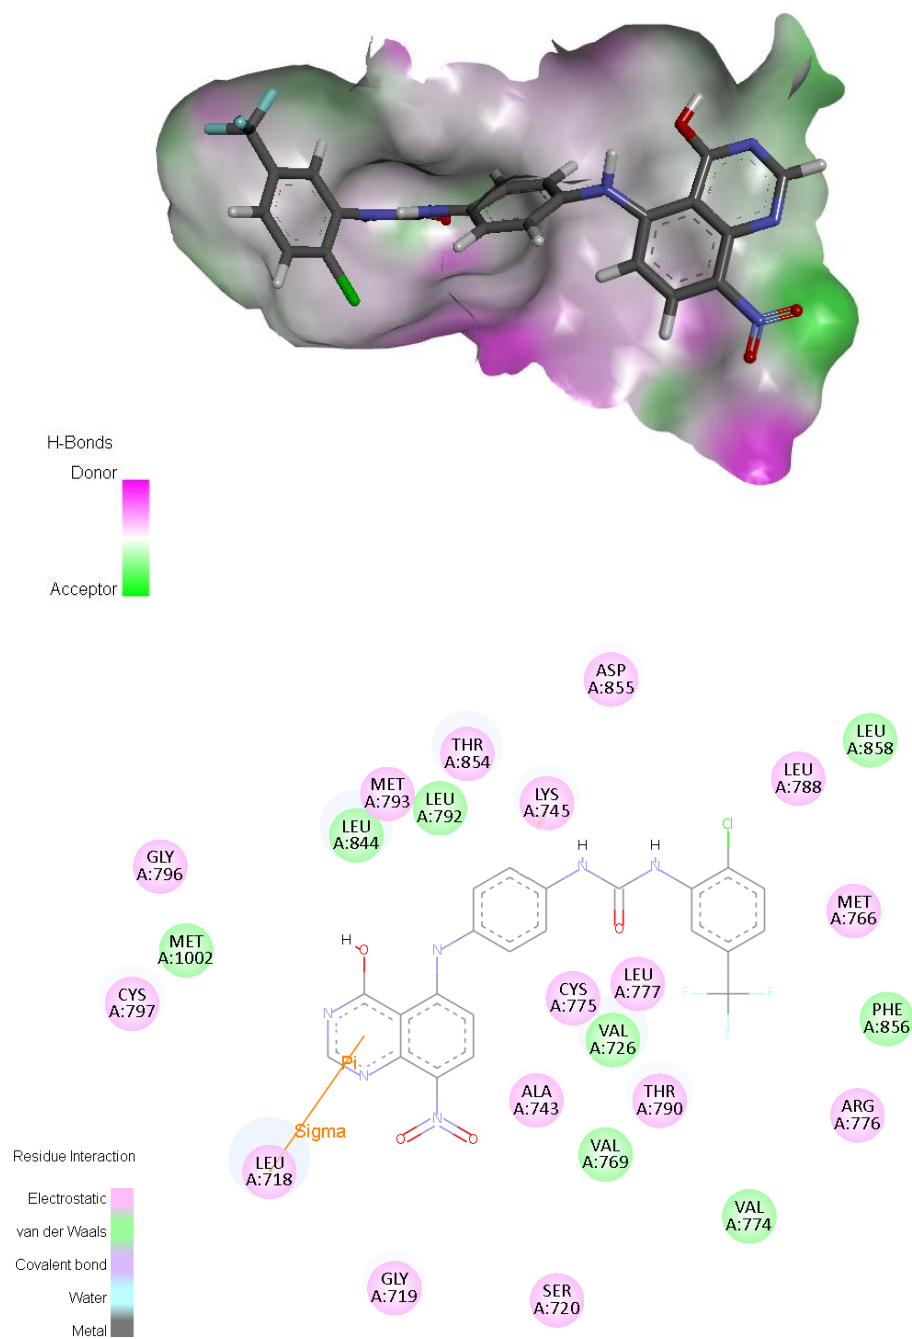

5

10

The Binding mode of Compound **6f** in VEGFR-2 Kinase activity pocket area

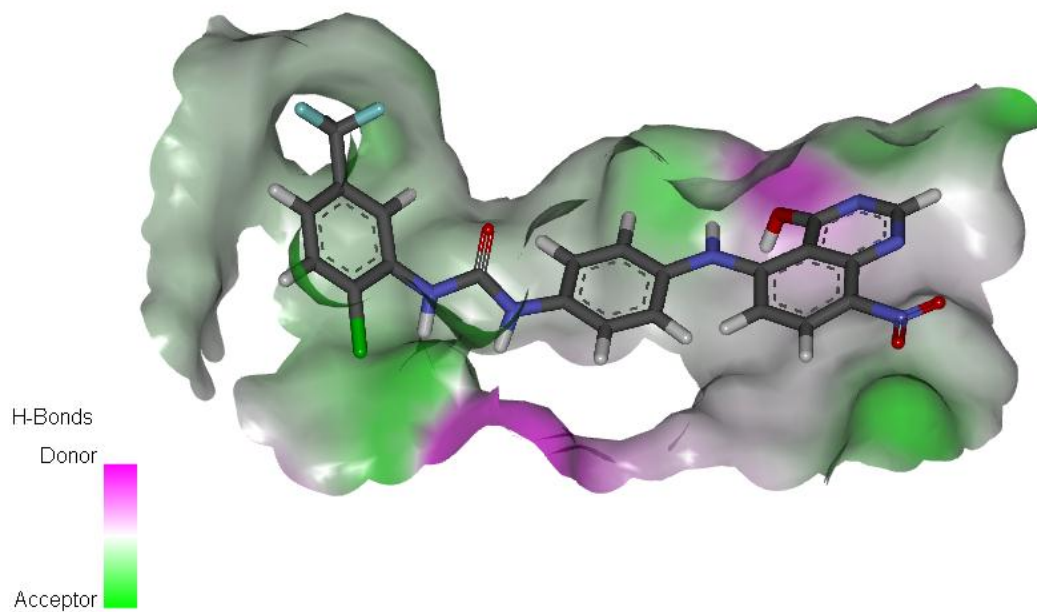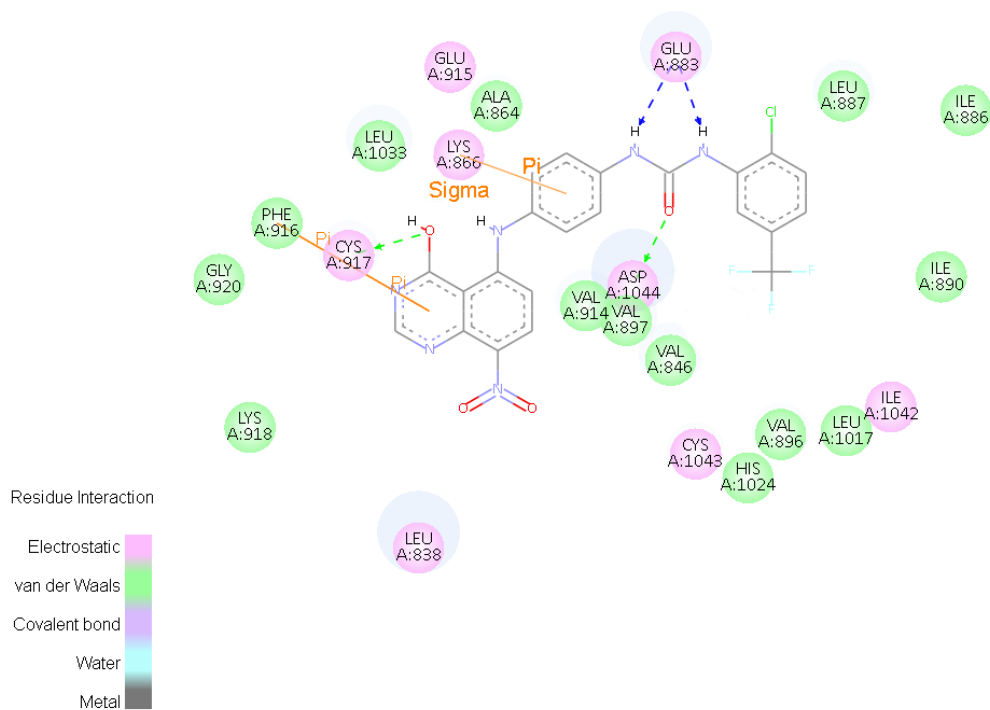

Supplement: c3ob40368h.pdf [file c3ob40368h.pdf]
